# Supplementary material for: The physical characteristics of human proteins in different biological functions
Source: PLoS One. 2017 May 1;12(5):e0176234. doi: 10.1371/journal.pone.0176234 (PMC5411090; doi:10.1371/journal.pone.0176234)
Supplement: S5 File — (XLSX) [file pone.0176234.s005.xlsx]

## Sheet: KaKs
Class	magnesium ion binding	peptide receptor activity	G-protein-coupled receptor binding	purine nucleoside binding	DNA binding	transcription coactivator activity	transcription corepressor activity	RNA binding	motor activity	GTPase activity	carboxylesterase activity	helicase activity	nuclease activity	protein tyrosine kinase activity	receptor activity	olfactory receptor activity	receptor signaling protein activity	guanyl-nucleotide exchange factor activity	Ras GTPase activator activity	receptor binding	cytokine activity	cytokine receptor binding	hormone activity	potassium channel activity	iron ion binding	calcium ion binding	calmodulin binding	sugar binding	phospholipid binding	protein C-terminus binding	growth factor activity	cytoskeletal protein binding	transcription factor binding	translation factor activity, nucleic acid binding	UDP-glycosyltransferase activity	peptidase activity	cysteine-type peptidase activity	metallopeptidase activity	anion transmembrane transporter activity	primary active transmembrane transporter activity	tubulin binding	lipase activity	oxidoreductase activity, acting on CH-OH group of donors	oxidoreductase activity, acting on paired donors, with incorporation or reduction of molecular oxygen	transferase activity, transferring one-carbon groups	transferase activity, transferring acyl groups	transferase activity, transferring glycosyl groups	transferase activity, transferring phosphorus-containing groups	nucleotidyltransferase activity
magnesium ion binding
peptide receptor activity
G-protein-coupled receptor binding
purine nucleoside binding
DNA binding				2.38152e-08
transcription coactivator activity		0.00229154	0.0140157		0.000232054
transcription corepressor activity		0.0343962
RNA binding		0.00399755	0.00160218		5.42286e-13
motor activity
GTPase activity	0.000142472	3.52185e-10	6.77323e-10	6.28135e-14	8.03388e-23	0.000367093	0.00356909	7.42167e-05	4.45807e-06
carboxylesterase activity	0.000846774			0.000181228		6.2042e-06	0.000164181	4.17723e-06		7.11575e-13
helicase activity										1.20881e-07
nuclease activity	0.00014013			2.66159e-06		1.53383e-07	2.79854e-05	8.4868e-09		8.91873e-18
protein tyrosine kinase activity										0.000239421	0.00068426		0.000182869
receptor activity	8.88363e-07			9.12685e-26	0.000104648	3.49184e-12	6.0864e-07	9.26942e-27	0.0151405	2.92963e-31				5.52525e-05
olfactory receptor activity						0.00175575	0.00642099	0.0111697		6.64117e-07				0.0132324
receptor signaling protein activity										0.000351073					0.00454164
guanyl-nucleotide exchange factor activity										7.93626e-09	0.0261562		0.0361255		0.0218731
Ras GTPase activator activity										1.48961e-06	0.003236		0.00577383		0.0421306	0.0263094
receptor binding	0.00708088			1.68996e-10		8.48175e-07	0.00164825	2.83295e-14		2.86568e-23				0.0457468
cytokine activity	2.31424e-14			8.32741e-24	1.1816e-12	1.62265e-18	3.66094e-14	1.98154e-24	2.87125e-10	3.27301e-27		3.64186e-09		8.17524e-13	0.000103764		1.00505e-09	1.61102e-11	6.86769e-11	1.6051e-07
cytokine receptor binding	6.9609e-11			2.02849e-16	3.1869e-08	1.30027e-13	1.27718e-10	1.44628e-17	1.16798e-07	1.46627e-21		6.74637e-07		1.15893e-09	0.0147564		3.37657e-07	2.2934e-08	6.6991e-08	0.000123029
hormone activity	8.57407e-07			1.4339e-08	0.0082694	2.22406e-09	1.07944e-07	1.15202e-09	0.000106659	1.09639e-14		0.00171885		3.78367e-07			0.000234635	7.39986e-06	8.40702e-07
potassium channel activity		0.0230305			0.0369872						0.000163952		1.80048e-05		2.44042e-07	0.0289895				0.0011462	1.67553e-13	1.32179e-10	1.0217e-06
iron ion binding	1.58732e-05			5.36616e-08		1.80529e-09	1.67723e-06	1.81223e-10	0.0273658	2.99891e-20				1.2625e-05			0.0165541	0.0059609	0.000532668		0.00307863			1.72822e-06
calcium ion binding						0.0207356		6.39671e-06		2.24628e-18					0.000376731						8.94353e-14	1.52329e-09	0.000568127
calmodulin binding										0.0175398	0.000350902		5.69915e-05		2.35378e-06	0.0251669				0.00456048	1.86219e-13	1.87836e-10	7.28582e-07		1.02015e-05
sugar binding	8.82786e-07			4.15682e-11	0.00373715	1.805e-09	6.97168e-07	1.42838e-13	0.00075572	8.26889e-20		0.00775392		1.48196e-05			0.000967303	0.000463909	0.000810013					5.49261e-07		0.000264707	1.82164e-06
phospholipid binding										5.11001e-08	0.0265428		0.00575747		0.000455363						2.43452e-12	3.69571e-09	1.47651e-05		0.00101075			0.000102206
protein C-terminus binding										0.000556121	0.00389044		0.00241462		0.00019684						1.91376e-12	2.36645e-09	1.54407e-06		0.000325331			1.59073e-05
growth factor activity	0.00572027			0.000412333		1.86203e-05	0.000705857	1.6706e-06		5.03559e-15				0.00601606							0.0231973			0.00116859			0.00239906			0.0302368
cytoskeletal protein binding					0.000929189					1.38665e-09	0.000392571		1.45292e-05		1.25389e-14					2.3893e-06	5.55523e-20	2.67829e-14	8.85449e-08		9.1537e-07			1.58513e-09			0.00132014
transcription factor binding		0.00149275	0.00330212		1.77165e-09					8.21061e-07	7.78601e-07		3.32498e-09		2.10132e-22	0.00166249				3.50511e-12	4.4044e-24	4.1383e-17	1.12079e-10		1.11174e-11	0.000109825		9.74737e-13			8.1809e-07
translation factor activity, nucleic acid binding		0.0151972	0.0275032		0.0132175						0.000112567		1.92305e-05		1.21239e-06	0.00702576				0.000636446	3.88418e-12	6.79922e-10	6.32218e-07		6.19539e-06			6.18337e-07			0.000482852
UDP-glycosyltransferase activity										5.93842e-09											3.64061e-06	0.000223622
peptidase activity	1.79729e-05			5.84069e-14		1.39616e-10	3.27175e-06	1.65469e-17		7.88101e-28				0.00015254					0.0447807		6.66411e-08	4.229e-05		1.7066e-06			1.87924e-05		0.00630633	0.00176803		1.13088e-09	1.08343e-16	3.58444e-06
cysteine-type peptidase activity										5.06083e-11											1.25625e-06	0.000213539	0.024894
metallopeptidase activity	0.00242951			4.69035e-05		7.11661e-07	0.000246907	5.33784e-08		5.57688e-19				0.0029047							5.37061e-05	0.00350471		0.000156084			0.000741861			0.047214		0.000176918	1.29435e-08	0.00011336
anion transmembrane transporter activity										2.1954e-07											5.42014e-09	9.51339e-07	0.00704727					0.00663253
primary active transmembrane transporter activity										0.000496048	0.0440188		0.0357837		0.0140505						4.92486e-10	7.15656e-08	0.000128652		0.0311542			0.000286398
tubulin binding										0.000153539											0.000249202	0.00319233
lipase activity						0.00893136		0.0079523		4.67796e-10											0.0138196												0.00359328	0.0169852
oxidoreductase activity, acting on CH-OH group of donors						0.000460782	0.00927251	0.000927897		8.76364e-12											0.00161934	0.0310539		0.0159073			0.0416964						0.000123147	0.00544594
oxidoreductase activity, acting on paired donors, with incorporation or reduction of molecular oxygen	0.00520373			0.00132968		1.03717e-05	0.000857019	6.38099e-06		4.72122e-15				0.00369469							0.0018203			0.000426108			0.00208622					0.00286358	1.28138e-06	0.000363172
transferase activity, transferring one-carbon groups	0.0384367			0.00309449		4.20857e-05	0.00449599	7.81262e-06		1.96145e-15				0.024494							2.07593e-05	0.00161263		0.00495068			0.0113293					0.009255	2.0544e-06	0.00180839
transferase activity, transferring acyl groups										2.54513e-11											9.37459e-11	1.4067e-07	0.000489658					0.00290689
transferase activity, transferring glycosyl groups						0.0047539		0.000103929		1.36907e-15											1.42568e-08	7.25e-06	0.0179806										0.000187955	0.0234258
transferase activity, transferring phosphorus-containing groups		0.0120051	0.0242292		2.4177e-09					6.75196e-11	1.98272e-05		5.80206e-08		6.57205e-25	0.014473				1.1666e-11	1.82188e-24	3.5565e-17	1.91737e-09		6.06722e-10	0.0048858		5.89887e-12			1.99074e-05					6.03487e-16		5.20775e-07					0.00454853	3.76621e-05	8.79377e-05		0.00711194
nucleotidyltransferase activity										0.000627051											4.35217e-08	2.5198e-06	0.00533092					0.0102528
hydrolase activity, acting on ester bonds				0.000503528		0.000211476		1.33387e-08		6.93311e-21					0.0153625						2.42229e-13	6.85714e-09	0.000809222	0.0220525				0.00159386				0.0145581	1.37959e-07	0.0104207														3.74967e-06
thiolester hydrolase activity										6.20762e-06											1.68043e-05	0.000971302	0.0401537
hydrolase activity, acting on glycosyl bonds	7.81868e-09			2.89808e-11	0.00398508	2.40494e-12	7.77211e-10	2.45669e-12	4.71795e-06	7.62751e-19		0.000828475		6.20368e-09			5.96521e-05	1.10352e-07	6.77032e-09					4.52969e-09		5.9438e-05	8.25816e-09		2.47744e-07	7.1979e-08		3.09164e-10	3.29449e-14	9.22445e-09	0.038256		0.0154191		0.0055304	4.19539e-06						5.46875e-05	0.0107315	2.24446e-12	0.00298406
hydrolase activity, acting on carbon-nitrogen (but not peptide) bonds										3.28803e-10											6.26979e-05	0.00288888											0.0267055
hydrolase activity, acting on acid anhydrides		0.0125695	0.00551156		3.2123e-11					2.77773e-07	7.32257e-06		3.51622e-08		6.41138e-26	0.0172064				6.48389e-13	1.29858e-24	1.01736e-17	1.64116e-09		8.27408e-10	0.000163534		3.35381e-13			9.11365e-06					1.77518e-16		3.54092e-07				0.0283184	0.00280798	2.81534e-05	5.65856e-05		0.00147571
hydrolase activity, acting on acid anhydrides, catalyzing transmembrane movement of substances										4.49072e-05											7.09853e-09	6.88132e-07	0.000585425					0.00233593
ligase activity, forming carbon-nitrogen bonds		0.000379552	0.000825231		7.0452e-09					0.0133011	4.92814e-07		2.16381e-09		1.0383e-18	0.000973722				3.7767e-11	6.2911e-22	3.51041e-16	2.73797e-10		2.21e-11	1.77377e-05		2.5921e-12			3.15838e-07					4.0543e-15	0.00778324	5.36926e-09				0.00101552	4.68676e-05	5.04563e-07	1.05338e-06		2.66071e-05
ATPase activity										4.71522e-09	0.00261181		0.000419003		2.21733e-09					0.00200943	3.69222e-17	1.36236e-12	1.08019e-06		7.94357e-05			6.6095e-08			0.0193332					5.08363e-06		0.0118835						0.0431852
purine nucleotide binding		0.0355815	0.0225394		3.28569e-14					1.45528e-11	2.62621e-05		1.1321e-07		4.56172e-33	0.0355345				1.30448e-14	1.41084e-25	9.31075e-18	2.8379e-09		1.3649e-09	0.00105455		9.13624e-13			3.04879e-05					4.97318e-18		1.0381e-06					0.00980807	0.000102458	0.000161219		0.00770656
SH3 domain binding										1.86188e-05											8.09706e-09	1.07677e-06	0.000541962					0.00623827
serine hydrolase activity	2.56206e-08			3.67168e-12	0.0148571	5.8569e-12	5.89664e-09	4.70224e-14	4.04626e-05	1.53623e-21		0.00403687		6.89199e-08			0.000271467	4.81841e-06	9.05603e-07					1.29707e-08		0.000228894	4.16462e-08		3.07352e-06	5.47384e-07		1.80877e-10	5.22516e-15	2.06966e-08					0.00820689	2.32275e-05						0.000453994		1.70564e-13	0.00706193
guanyl nucleotide binding		5.33736e-06	4.54498e-06	4.41899e-06	3.36811e-17						4.53333e-09	0.0134448	8.3699e-13		2.60816e-28	0.00027282		0.0105409		3.8337e-18	1.16427e-25	2.22292e-19	8.9273e-12		7.73606e-15	2.10015e-11		2.54402e-16	0.04115		4.75562e-10	0.00983495			0.000590149	1.68071e-22	1.95881e-05	5.48092e-13	0.0176084			7.57866e-06	5.52329e-07	8.23341e-10	5.177e-10	4.92796e-05	2.58441e-09	0.00308538
growth factor binding										4.76496e-07											0.00586761
enzyme binding					0.00010432					4.76536e-09	0.000673892		1.14412e-05		2.80009e-16					2.84626e-07	7.53305e-20	3.76803e-14	1.4079e-07		4.02279e-07			2.39386e-09			0.000998758					3.51007e-10		0.000127059						0.00248657	0.00562629
kinase binding										1.32586e-06	0.0184629		0.00177057		6.28193e-05						2.31049e-12	5.42027e-09	8.99383e-06		0.000142581			8.68975e-05								0.00085524		0.0262173
protein domain specific binding					0.00114918					6.76748e-07	0.000491475		1.44787e-05		5.44043e-13					6.1472e-06	7.53395e-19	6.72473e-14	1.94462e-07		1.25291e-06			3.27845e-09			0.0012217					8.09536e-09		0.000300855						0.00234965	0.00936518
cytokine binding	1.12614e-10	0.0187026		1.51008e-14	8.87424e-08	1.21312e-12	4.91896e-10	3.72134e-15	5.54117e-08	1.70383e-17		5.72895e-08	0.00885635	5.72211e-10	0.00446555		4.82885e-07	5.35656e-09	8.28908e-09	5.3485e-05				4.21855e-10	0.000340123	7.20429e-10	6.30498e-10		5.15606e-09	6.28066e-10	0.0111041	5.65146e-13	7.64014e-15	2.39507e-09	1.83181e-05	9.54579e-07	8.36765e-06	8.69729e-05	3.66398e-08	8.39405e-09	0.000686074	0.00260165	0.000139417	0.000305898	1.90802e-05	1.89771e-08	5.24133e-07	4.21782e-15	1.70357e-07
passive transmembrane transporter activity					0.0454853					3.44177e-09	0.00141441		7.70632e-05		5.49735e-11					0.000307706	9.23376e-18	7.44736e-13	7.99502e-07		9.28322e-06			3.1026e-08			0.00833763					2.15578e-07		0.00127256						0.0100488
active transmembrane transporter activity						0.0137533		0.000249219		3.61652e-16											9.83684e-12	2.50463e-08	0.00116199					0.00177791					0.000407548															0.0331402
ligand-gated channel activity		0.010147									8.73399e-05		1.39913e-05		2.27338e-06	0.00591587				0.00238567	1.0704e-12	1.22234e-09	2.33274e-07		1.47911e-06			1.4234e-06			0.00046498					3.95202e-06		8.79111e-05				0.0217085	0.00627321	0.000248893	0.00217068
inorganic cation transmembrane transporter activity								0.0140189		2.15049e-12											8.85595e-08	1.57239e-05	0.029169										0.0130871
substrate-specific transmembrane transporter activity								0.00128214		1.21371e-16			0.0116364		1.26514e-09					0.0488546	3.60539e-17	5.38059e-12	1.65045e-05		0.0021481			9.69806e-07					0.0178981			0.00016624
polysaccharide binding	0.000276823			4.41286e-06		1.59539e-07	4.68112e-05	2.30534e-08		2.35401e-17				0.000301904				0.03114	0.00549692		0.00989784			2.4752e-05			0.000121636		0.0122974	0.00332615		2.25778e-05	3.75972e-09	4.41572e-05														1.68896e-07
peptidase inhibitor activity	2.59419e-10			4.09773e-15	7.35647e-07	8.57175e-13	4.98255e-10	2.33172e-16	2.1562e-07	5.1396e-20		1.18543e-06		1.36556e-09			1.6163e-06	5.15149e-08	4.31474e-08	0.000838764				7.96951e-10		7.81219e-09	8.97093e-10		1.82682e-08	2.40442e-09		4.60913e-13	7.82992e-16	3.80948e-09	0.000355424	0.000111858	0.00027298	0.00599189	6.11186e-07	6.6644e-08	0.0118296		0.0126216	0.027221	0.000978811	3.29645e-07	1.15118e-05	6.33205e-16	2.58798e-06
GTPase regulator activity										2.07373e-14	0.000108192		1.79721e-05		2.63171e-10	0.0255084				0.000542711	3.66909e-20	5.0528e-14	5.02978e-09		4.34775e-07			1.83029e-08			0.00188956					9.62222e-08		0.00104911						0.00387086	0.0125095
protein complex binding										2.68259e-07			0.0299223		0.00034116						3.0009e-12	4.11137e-09	7.45838e-05		0.00958711			7.99874e-05								0.0183005
ribonucleotide binding		0.0195345	0.0130411		8.40447e-16					1.14933e-10	1.56517e-05		4.17983e-08		1.18068e-34	0.0273863				1.05319e-15	6.55021e-26	4.53585e-18	2.07693e-09		4.45197e-10	0.000157459		3.42732e-13			1.34733e-05					3.5293e-19		2.76366e-07					0.00542244	4.26741e-05	6.46836e-05		0.00231952
phosphoric ester hydrolase activity										1.82287e-10	0.00743973		0.00132258		2.85492e-07					0.0201288	1.48303e-16	9.26274e-12	8.80483e-07		0.000127686			1.10342e-06			0.042184					8.50843e-05		0.0374826
identical protein binding										1.97487e-13	0.00155914		9.50775e-05		3.71122e-13					5.68315e-05	4.32073e-20	5.00336e-14	1.12655e-07		3.74285e-06			1.04154e-08			0.00666114					4.43268e-08		0.0030442						0.0170503
cation binding				1.44696e-13		4.90049e-06	0.0134668	6.05172e-17		3.43097e-26					7.6771e-06						2.37892e-14	2.31487e-09	0.00181031	0.00487559			0.0343263	0.000808005				1.23505e-05	4.18961e-13	0.00250604														1.01191e-13
ATPase activity, coupled to movement of substances										6.79269e-05											8.20724e-09	7.26423e-07	0.000684966					0.00234266
sequence-specific DNA binding		0.0151244	0.022177		1.22864e-07					3.69196e-08	2.65414e-05		1.54001e-07		2.23233e-20	0.0137256				4.86054e-10	1.78135e-22	8.50928e-16	4.10973e-09		2.47225e-09	0.00370461		2.2688e-11			2.2505e-05					5.199e-14		6.18031e-07				0.0376383	0.00376093	5.16411e-05	0.000127338		0.00443911
structure-specific DNA binding										7.66773e-05					0.00943476						3.41742e-10	1.00124e-07	0.000261896		0.0421549			0.000772594
DNA regulatory region binding		0.0139931			0.0448					0.0472006	3.73679e-05		8.23109e-06		3.51231e-07	0.00423124				0.000813182	3.13888e-14	1.26178e-10	3.6898e-08		6.07796e-07			2.92062e-07			0.000218386					1.01884e-06		4.61078e-05				0.0201213	0.00433304	0.00021342	0.00123184		0.0476268
metal ion transmembrane transporter activity										6.17113e-08											3.55411e-08	4.22799e-06	0.00289594					0.0275491
protein heterodimerization activity										1.62781e-05	0.00097291		9.7501e-05		2.42334e-07					0.00435759	1.41523e-15	1.60086e-11	5.68673e-07		1.18968e-05			3.37296e-07			0.00554301					7.00415e-06		0.00186385						0.00576175	0.0422129
protein dimerization activity										1.73538e-12	0.00252733		0.000178671		1.9544e-11					0.00031357	7.00862e-19	3.18573e-13	3.11886e-07		8.22238e-06			3.83864e-08			0.0110438					2.38546e-07		0.00405089						0.0251562
coenzyme binding						0.00454106		0.0112331		2.21083e-14											1.24625e-09	2.49e-06	0.000141533										0.00197203
GTPase binding										0.000323849	0.00676542		0.00251024		0.000841846						3.57669e-11	1.7958e-08	9.54979e-06		0.000535847			0.000104252								0.00355635		0.0418741
unfolded protein binding										0.0453032	0.0066192		0.00167967		0.000196573						2.03386e-11	5.38265e-09	6.83281e-06		0.000589023			1.95785e-05			0.0368991					0.00161014		0.0246357						0.0345779
endopeptidase regulator activity	1.10246e-08			9.00903e-13	2.23439e-05	6.22009e-11	1.60681e-08	4.9276e-14	4.34702e-06	1.08645e-17		2.10579e-05		4.01346e-08			2.46913e-05	1.15572e-06	6.72328e-07	0.0103976				2.69762e-08		3.61084e-07	2.88957e-08		4.92408e-07	6.90522e-08		4.9836e-11	1.48187e-13	7.59977e-08	0.00355945	0.00178509	0.00250577	0.0451976	1.37273e-05	1.40267e-06					0.00874142	7.80208e-06	0.000196774	1.58611e-13	3.71971e-05
[truncated: 41 more columns]

## Sheet: mRNADR
Class	magnesium ion binding	peptide receptor activity	G-protein-coupled receptor binding	purine nucleoside binding	DNA binding	transcription coactivator activity	transcription corepressor activity	RNA binding	motor activity	GTPase activity	carboxylesterase activity	helicase activity	nuclease activity	protein tyrosine kinase activity	receptor activity	olfactory receptor activity	receptor signaling protein activity	guanyl-nucleotide exchange factor activity	Ras GTPase activator activity	receptor binding	cytokine activity	cytokine receptor binding	hormone activity	potassium channel activity	iron ion binding	calcium ion binding	calmodulin binding	sugar binding	phospholipid binding	protein C-terminus binding	growth factor activity	cytoskeletal protein binding	transcription factor binding	translation factor activity, nucleic acid binding	UDP-glycosyltransferase activity	peptidase activity	cysteine-type peptidase activity	metallopeptidase activity	anion transmembrane transporter activity	primary active transmembrane transporter activity	tubulin binding	lipase activity	oxidoreductase activity, acting on CH-OH group of donors	oxidoreductase activity, acting on paired donors, with incorporation or reduction of molecular oxygen	transferase activity, transferring one-carbon groups	transferase activity, transferring acyl groups	transferase activity, transferring glycosyl groups	transferase activity, transferring phosphorus-containing groups	nucleotidyltransferase activity
magnesium ion binding
peptide receptor activity
G-protein-coupled receptor binding
purine nucleoside binding
DNA binding				5.39307e-06
transcription coactivator activity
transcription corepressor activity
RNA binding					0.000461275
motor activity
GTPase activity					6.7606e-05
carboxylesterase activity
helicase activity
nuclease activity
protein tyrosine kinase activity
receptor activity					1.12098e-06
olfactory receptor activity
receptor signaling protein activity
guanyl-nucleotide exchange factor activity
Ras GTPase activator activity
receptor binding					0.00432641
cytokine activity
cytokine receptor binding
hormone activity					0.0441752
potassium channel activity
iron ion binding					0.000242801	0.0165431								0.00917331				0.01516
calcium ion binding					2.2613e-05
calmodulin binding
sugar binding				0.012678	1.14865e-05	0.000882505						0.0286611		0.000710891				0.0012363
phospholipid binding					0.000556387	0.0426792								0.018165				0.0287499
protein C-terminus binding																												0.0326192
growth factor activity
cytoskeletal protein binding					8.82034e-06
transcription factor binding										0.031237															0.00955922	0.0432935		0.000604398	0.0316654
translation factor activity, nucleic acid binding
UDP-glycosyltransferase activity
peptidase activity					2.1773e-05
cysteine-type peptidase activity
metallopeptidase activity					0.0477667
anion transmembrane transporter activity
primary active transmembrane transporter activity
tubulin binding
lipase activity
oxidoreductase activity, acting on CH-OH group of donors					0.000126857	0.00446617								0.00238413				0.00209964															0.00365292
oxidoreductase activity, acting on paired donors, with incorporation or reduction of molecular oxygen					0.00103454	0.0151651								0.00837441				0.00915061															0.0147105
transferase activity, transferring one-carbon groups
transferase activity, transferring acyl groups
transferase activity, transferring glycosyl groups
transferase activity, transferring phosphorus-containing groups																									0.00840549			0.000277166	0.0233937														0.00159544	0.00885269
nucleotidyltransferase activity
hydrolase activity, acting on ester bonds
thiolester hydrolase activity
hydrolase activity, acting on glycosyl bonds
hydrolase activity, acting on carbon-nitrogen (but not peptide) bonds
hydrolase activity, acting on acid anhydrides					1.3309e-05
hydrolase activity, acting on acid anhydrides, catalyzing transmembrane movement of substances
ligase activity, forming carbon-nitrogen bonds																												0.0211118
ATPase activity					0.00860583
purine nucleotide binding					8.53366e-08																							0.0266703
SH3 domain binding
serine hydrolase activity
guanyl nucleotide binding					0.000416036
growth factor binding
enzyme binding					0.0179133																							0.0215298
kinase binding
protein domain specific binding
cytokine binding
passive transmembrane transporter activity
active transmembrane transporter activity					3.05843e-06																												0.00706966															0.0116132
ligand-gated channel activity
inorganic cation transmembrane transporter activity					1.64896e-05	0.0177283								0.00980721				0.0220173															0.00420998															0.00507259
substrate-specific transmembrane transporter activity					1.09178e-09	0.0059659								0.00969997				0.0348471															0.000126496															0.000125857
polysaccharide binding
peptidase inhibitor activity				0.0105777	2.60371e-05	0.000698932						0.0247206		0.000245034				0.000389638												0.0434642			0.000874248				0.0483681											0.000151316
GTPase regulator activity																												0.00609227															0.019314
protein complex binding
ribonucleotide binding					5.80464e-07																							0.0164241
phosphoric ester hydrolase activity
identical protein binding					4.56915e-07
cation binding					0.0138359																							0.00418763															0.0379334
ATPase activity, coupled to movement of substances
sequence-specific DNA binding				0.0115928						0.00172135					0.00117178										0.00349145	0.00195001		0.000458286	0.00576278			0.00214602				0.00215545							0.00264698	0.010902
structure-specific DNA binding																												0.0177267
DNA regulatory region binding																												0.013689															0.0206447
metal ion transmembrane transporter activity
protein heterodimerization activity
protein dimerization activity					0.00232055
coenzyme binding				0.0132406	1.6282e-07	0.00110042	0.0460795							0.00210077				0.0036999															0.000126553															9.05371e-05
GTPase binding
unfolded protein binding
endopeptidase regulator activity				0.0346791	6.27979e-05	0.00217048								0.000599792				0.000750042															0.00234586															0.000470699
[truncated: 41 more columns]

## Sheet: proteinDR
Class	magnesium ion binding	peptide receptor activity	G-protein-coupled receptor binding	purine nucleoside binding	DNA binding	transcription coactivator activity	transcription corepressor activity	RNA binding	motor activity	GTPase activity	carboxylesterase activity	helicase activity	nuclease activity	protein tyrosine kinase activity	receptor activity	olfactory receptor activity	receptor signaling protein activity	guanyl-nucleotide exchange factor activity	Ras GTPase activator activity	receptor binding	cytokine activity	cytokine receptor binding	hormone activity	potassium channel activity	iron ion binding	calcium ion binding	calmodulin binding	sugar binding	phospholipid binding	protein C-terminus binding	growth factor activity	cytoskeletal protein binding	transcription factor binding	translation factor activity, nucleic acid binding	UDP-glycosyltransferase activity	peptidase activity	cysteine-type peptidase activity	metallopeptidase activity	anion transmembrane transporter activity	primary active transmembrane transporter activity	tubulin binding	lipase activity	oxidoreductase activity, acting on CH-OH group of donors	oxidoreductase activity, acting on paired donors, with incorporation or reduction of molecular oxygen	transferase activity, transferring one-carbon groups	transferase activity, transferring acyl groups	transferase activity, transferring glycosyl groups	transferase activity, transferring phosphorus-containing groups	nucleotidyltransferase activity
magnesium ion binding
peptide receptor activity	0.000164497
G-protein-coupled receptor binding	0.0128827
purine nucleoside binding		5.39229e-07	2.95959e-06
DNA binding		1.81352e-06	0.00104321	0.000474944
transcription coactivator activity		6.3254e-05
transcription corepressor activity		0.00062378
RNA binding		1.94698e-07	1.03298e-06		0.00126595
motor activity		0.00114684
GTPase activity		9.07925e-07	1.4951e-05
carboxylesterase activity
helicase activity		0.000430782	0.0136486
nuclease activity		0.00115398
protein tyrosine kinase activity
receptor activity	3.64559e-12			1.113e-52	4.51278e-45	1.15006e-12	3.51627e-08	3.82737e-46	1.26732e-06	1.38028e-24		1.39867e-09	6.66149e-09	0.0182832
olfactory receptor activity
receptor signaling protein activity		0.00787827													1.09289e-05
guanyl-nucleotide exchange factor activity		0.000144831	0.013981												9.48985e-10
Ras GTPase activator activity
receptor binding	0.0126773			1.87837e-16	3.02566e-08			8.27277e-15		4.10174e-08		0.0182318			2.41026e-07
cytokine activity	0.000160283			4.00638e-09	1.06893e-06	0.00100055	0.0393309	1.02455e-09	0.00884692	5.29064e-08		0.000673059	0.0414667					0.000785876
cytokine receptor binding	0.00371472			4.17885e-07	0.000273923	0.0346691		1.80456e-07		3.36345e-06		0.00680746						0.0110478
hormone activity	5.4439e-06			1.85003e-09	4.211e-09	1.32616e-06	0.000196773	3.44166e-10	0.000105188	8.01509e-09		2.83907e-05	4.58753e-05				0.00825318	1.48821e-05
potassium channel activity				0.00107614				0.000254556		0.000411891
iron ion binding								0.0372266							0.00895901
calcium ion binding		0.000148933													8.80208e-18						0.016178		3.18467e-05
calmodulin binding		0.00158328													5.70061e-06								0.00351985
sugar binding															0.00211952
phospholipid binding		0.000134085													4.22057e-12						0.00449576	0.0334357	4.86155e-05
protein C-terminus binding		0.000117759	0.0205539												2.35908e-11						0.000793439	0.0111708	6.11909e-06
growth factor activity	0.000657005			1.30179e-07	4.0109e-05	0.0074017		3.0345e-08	0.0271747	3.44491e-07		0.00183064						0.00140769											0.0251859	0.00407604
cytoskeletal protein binding		3.79433e-07	5.7212e-06		0.0125035										5.04942e-33					5.95795e-11	2.61273e-08	1.15601e-06	7.89662e-09	0.000724857	0.0242375						4.52912e-07
transcription factor binding		1.14983e-05	0.0101713												4.97243e-24					0.00150308	7.31927e-05	0.00531557	3.22583e-07								0.000974905
translation factor activity, nucleic acid binding		4.05915e-06	4.8163e-06		0.000194456	0.0354549	0.0478163						0.00203307		1.80421e-16					1.93201e-07	2.25278e-07	2.18903e-06	1.56053e-07	6.19197e-05	0.00286561	0.0112621		0.0291608			4.0789e-07		0.00301359
UDP-glycosyltransferase activity															0.0443354																			0.00660628
peptidase activity		0.000899812		0.00037349				0.000193435		0.00799315					7.25377e-14								0.000159965									0.00165166		0.000194227
cysteine-type peptidase activity		0.000980903													3.67268e-07								0.000247769
metallopeptidase activity		0.00601583													2.6451e-05								0.00300054
anion transmembrane transporter activity	4.59574e-05			6.79397e-08	6.04129e-07	0.000121726	0.00525123	1.65754e-08	0.00251847	2.73727e-07		0.000472993	0.00447978					0.000818714								0.00199533	0.0373096		0.00119024	0.000273062		1.24576e-07	2.35635e-05	2.57719e-06		0.00625421	0.004193
primary active transmembrane transporter activity																																		0.00295335
tubulin binding		0.000391884													8.22147e-08						0.00472925		4.90807e-05								0.0130842								0.00146299
lipase activity																																		0.0023618
oxidoreductase activity, acting on CH-OH group of donors		1.45639e-05	0.000785086												5.02351e-14					0.000322719	4.37063e-05	0.000443935	1.21099e-06	0.0119858							0.000114675								6.3911e-05
oxidoreductase activity, acting on paired donors, with incorporation or reduction of molecular oxygen				0.0351269				0.0149171		0.0298011																						0.0142346		0.000609859
transferase activity, transferring one-carbon groups		9.76454e-05	0.0246692												3.20639e-13					0.0470609	0.000358006	0.0104543	2.15579e-06								0.002374								0.000119737
transferase activity, transferring acyl groups				0.000199527				5.74826e-05		0.000604265					0.00319234																	0.000378541		2.88547e-05									0.046803
transferase activity, transferring glycosyl groups		0.0196446		0.0269994				0.0178415							3.1541e-06								0.0106804									0.0133607		0.000200801
transferase activity, transferring phosphorus-containing groups		7.77373e-07	8.18105e-06		0.0495542										1.09635e-41					1.07877e-12	1.394e-08	1.38023e-06	3.14417e-09	0.00140301							2.68389e-07					0.00342117			1.09027e-07							0.000584273
nucleotidyltransferase activity		0.000111076	0.00740514												2.02592e-11					0.0105084	0.00028381	0.00343861	3.98649e-06								0.000840202								0.0001704
hydrolase activity, acting on ester bonds		3.67564e-05	0.0209404												2.66319e-26					0.000459458	0.000220681	0.0102797	1.38473e-06								0.0028219			0.0267375					8.22726e-05
thiolester hydrolase activity		0.00149918													5.21588e-07						0.0164385		0.000247768								0.0206147								0.0051072
hydrolase activity, acting on glycosyl bonds															0.049562
hydrolase activity, acting on carbon-nitrogen (but not peptide) bonds		0.000311111	0.0143403												2.24282e-09					0.0430459	0.000295875	0.00548198	5.01811e-06	0.0425539							0.000564096								0.000315911
hydrolase activity, acting on acid anhydrides		1.67067e-06	3.86135e-05												5.35319e-37					2.04609e-10	1.18099e-07	9.79318e-06	1.54166e-08	0.00375896							2.40186e-06					0.035909			6.43145e-07							0.00356668
hydrolase activity, acting on acid anhydrides, catalyzing transmembrane movement of substances																																		0.0387449
ligase activity, forming carbon-nitrogen bonds		0.000116991													8.32046e-16						0.000865655	0.0301211	3.72032e-06								0.00573607								0.000146184
ATPase activity		0.00040244													9.97466e-14						0.00380617		7.08335e-05								0.0191771								0.0018048
purine nucleotide binding		3.72655e-07	2.50693e-06		0.000293889										3.4289e-57					1.46258e-17	3.0461e-09	3.89936e-07	1.33891e-09	0.00098575							1.06657e-07					0.000342614			5.68348e-08					0.0348285		0.000175069	0.0321571
SH3 domain binding		0.00124563													1.06443e-06						0.00705023		0.000260744								0.0118509								0.00389571
serine hydrolase activity	0.000684826			2.20987e-07	0.00011903	0.0112643		2.05431e-08		3.79198e-07		0.00218113						0.00309556												0.0109758		7.831e-07	0.00310123	4.05597e-07									0.000691994		0.0100577			5.67275e-07	0.00283029
guanyl nucleotide binding		1.79704e-06	0.000121608												2.0589e-28					1.14205e-07	6.33304e-07	4.13549e-05	3.43722e-08	0.00470046							6.43714e-06								1.77334e-06							0.00981984
growth factor binding				0.00590353				0.00248459		0.00368577																						0.00346817		0.000955974									0.0209222					0.00739168
enzyme binding		1.36937e-05	0.00248729												5.97394e-27					1.02735e-05	4.77478e-05	0.00151867	1.35509e-06								0.000652253								4.23463e-05
kinase binding		5.24366e-05	0.0160578												2.38437e-12					0.0420885	0.000595506	0.0091779	7.03831e-06								0.00386771								0.000305377
protein domain specific binding		1.47343e-05	0.00346686												1.72001e-21					0.000125307	1.47329e-05	0.000657799	3.33462e-07	0.0475702							0.000186518								1.31615e-05
cytokine binding	1.66543e-06			3.23257e-09	4.95521e-09	5.22512e-07	2.12083e-05	7.46902e-10	2.64489e-05	5.38646e-09		1.80086e-05	1.48582e-05				0.00329531	3.47082e-06								2.01016e-05	0.000986576		2.68818e-05	2.46604e-06		6.52293e-09	1.30717e-07	1.4674e-07		7.93639e-05	7.97022e-05	0.000705221			1.13835e-05		5.69477e-07		9.06556e-07		0.00321364	3.77723e-09	3.2263e-06
passive transmembrane transporter activity	2.03306e-08			1.09648e-20	1.07072e-16	5.70939e-08	3.90265e-05	7.45091e-21	0.000100936	4.51746e-15		5.06426e-07	3.53828e-05				0.00292723	3.24317e-07								1.17141e-07	0.000781047		6.6543e-07	2.52645e-07		5.50999e-17	9.47279e-12	4.1147e-12		6.55221e-06	0.000140223	0.00258565			2.03368e-05		2.32617e-09		3.56948e-08		0.0050525	9.29331e-19	1.04967e-07
active transmembrane transporter activity	8.25969e-06			3.99819e-15	1.97282e-10	9.17808e-05	0.0142714	1.53104e-15	0.00266518	1.99232e-11		2.45901e-05	0.0194856					7.22097e-05								0.000755946			0.000220597	9.90817e-05		1.47525e-12	5.92826e-07	2.86814e-10		0.0165065	0.018311				0.0019587		9.69669e-07		2.06359e-05			1.78805e-13	1.57889e-05
ligand-gated channel activity	2.0931e-05			4.49964e-08	3.91668e-07	2.72488e-05	0.00108135	7.26951e-09	0.000447637	4.56773e-08		0.000118239	0.000743405				0.041233	2.85964e-05								0.000965304	0.00879615		0.00074509	0.000107951		7.0436e-08	7.00559e-06	1.92611e-07		0.00372161	0.0024045	0.011469			0.000367208		8.66633e-06		3.54955e-05			6.9828e-08	4.9896e-05
inorganic cation transmembrane transporter activity	5.75622e-06			4.14846e-13	5.81449e-10	1.9211e-05	0.00601994	1.39589e-13	0.000918229	1.85423e-10		4.25027e-05	0.00416297					4.16469e-05								0.000242461	0.0181361		0.000136774	4.01042e-05		1.54641e-11	4.32188e-07	3.40549e-09		0.00337239	0.00421025				0.000474872		8.19574e-07		1.36451e-05			4.69915e-12	9.95562e-06
substrate-specific transmembrane transporter activity	5.73529e-09			4.56884e-34	4.53541e-26	4.30389e-08	0.000162821	1.24571e-31	0.000175803	3.41908e-18		3.29685e-07	0.000130048				0.011255	7.47508e-07								5.73772e-09	0.00211185		2.63165e-07	1.6347e-07		5.15202e-23	1.84323e-14	2.10883e-13		1.62234e-06	0.000297977	0.0138424			5.28852e-05		7.19136e-10		1.51105e-08		0.0290532	7.47183e-28	5.64055e-08
polysaccharide binding				0.000218491				6.31667e-05		0.000222464		0.0440589																				0.00029791		1.37741e-05									0.0124488					0.000491669
peptidase inhibitor activity
GTPase regulator activity		9.89314e-06	0.00246219												3.39649e-20					0.000292352	6.0688e-05	0.00137624	4.19741e-07								0.000568876								4.70014e-05
protein complex binding				0.0303572				0.0126838		0.0467792					0.000819279																	0.0282473		0.00197313
ribonucleotide binding		3.32656e-07	2.15882e-06		0.000238161										1.3311e-56					1.41942e-17	2.58432e-09	3.21937e-07	1.22695e-09	0.000874714							9.1141e-08					0.000289008			5.11647e-08					0.0299563		0.000140531	0.0298898
phosphoric ester hydrolase activity		3.55932e-05	0.00770622												1.88783e-18					0.00127517	0.000147015	0.00446392	2.49715e-06								0.00116263								0.000109178
identical protein binding		5.2696e-06	0.00102397												3.18535e-32					2.85152e-07	1.15686e-05	0.000417909	2.86769e-07								0.000217951								8.71629e-06
cation binding		4.75096e-06	0.00232308	0.000372548				0.00286184							6.23069e-49					6.96164e-09	7.47721e-06	0.000865174	6.00687e-08								0.000229733	0.0239968		0.00196427					5.14749e-06
ATPase activity, coupled to movement of substances																																		0.0437034
sequence-specific DNA binding		4.06634e-05		0.0384646				0.0176565							1.75167e-18						0.000771202		6.55818e-07								0.00767257	0.0341204		0.000207724					8.18753e-05
structure-specific DNA binding		0.00139696													7.55697e-09						0.0141349		0.000151503								0.046908								0.00444475
DNA regulatory region binding		0.00338801													8.92905e-06								0.000321979																0.00836733
metal ion transmembrane transporter activity	0.000500605			7.79422e-07	3.59785e-05	0.00123204	0.0309757	1.56069e-07	0.00625307	9.71801e-07		0.000760464						0.000403061								0.026433			0.00963478	0.00168078		1.12083e-06	0.00035845	7.27797e-07							0.00538527		9.15925e-05		0.000929659			1.27774e-06	0.00046017
protein heterodimerization activity		0.00169894													2.73115e-09								0.000350101											0.0152178					0.0100593
protein dimerization activity		3.48871e-05	0.0305554												2.32161e-23					0.00277726	0.000590682	0.0169451	3.53222e-06								0.00915737								0.00014495
coenzyme binding		2.64412e-05	0.000420839												1.50894e-17					2.59092e-05	7.06592e-06	0.000150915	4.57447e-07	0.00692252							2.86572e-05								1.3627e-05							0.0195967
GTPase binding		0.000330349	0.0237933												1.07779e-08						0.00166169	0.0179161	2.3213e-05								0.00387997								0.000891719
unfolded protein binding		0.0236859													2.06249e-05								0.0491607
endopeptidase regulator activity
[truncated: 41 more columns]

## Sheet: pI
Class	magnesium ion binding	peptide receptor activity	G-protein-coupled receptor binding	purine nucleoside binding	DNA binding	transcription coactivator activity	transcription corepressor activity	RNA binding	motor activity	GTPase activity	carboxylesterase activity	helicase activity	nuclease activity	protein tyrosine kinase activity	receptor activity	olfactory receptor activity	receptor signaling protein activity	guanyl-nucleotide exchange factor activity	Ras GTPase activator activity	receptor binding	cytokine activity	cytokine receptor binding	hormone activity	potassium channel activity	iron ion binding	calcium ion binding	calmodulin binding	sugar binding	phospholipid binding	protein C-terminus binding	growth factor activity	cytoskeletal protein binding	transcription factor binding	translation factor activity, nucleic acid binding	UDP-glycosyltransferase activity	peptidase activity	cysteine-type peptidase activity	metallopeptidase activity	anion transmembrane transporter activity	primary active transmembrane transporter activity	tubulin binding	lipase activity	oxidoreductase activity, acting on CH-OH group of donors	oxidoreductase activity, acting on paired donors, with incorporation or reduction of molecular oxygen	transferase activity, transferring one-carbon groups	transferase activity, transferring acyl groups	transferase activity, transferring glycosyl groups	transferase activity, transferring phosphorus-containing groups	nucleotidyltransferase activity
magnesium ion binding
peptide receptor activity	1.582e-14
G-protein-coupled receptor binding	0.0276559
purine nucleoside binding		1.55187e-21	0.000239407
DNA binding	9.77769e-07	0.0258964		1.77993e-42
transcription coactivator activity		5.19065e-13	0.00343602		6.61176e-09
transcription corepressor activity		3.62346e-07
RNA binding	1.53593e-08			4.21829e-32		5.48074e-11	0.00047035
motor activity		1.91468e-16	0.000129249		2.74197e-11			1.05478e-12
GTPase activity		2.14247e-18	1.65925e-06		3.24346e-17			2.00298e-18
carboxylesterase activity		2.26481e-11			0.00180348			9.18026e-05
helicase activity		1.29448e-07						0.03331
nuclease activity		1.47396e-05								0.00522053
protein tyrosine kinase activity		4.4488e-16	0.0072148		3.5264e-08			1.19122e-09
receptor activity	0.000625254	2.69147e-08		8.96611e-23	0.00879628	1.93434e-05		1.51254e-06	3.14251e-08	1.24309e-12				7.31441e-06
olfactory receptor activity	4.07763e-26			6.73741e-65		3.04027e-23	3.65712e-10		1.32618e-25	2.35905e-32	1.18405e-17	3.81485e-10	2.77268e-06	2.46444e-29	1.89066e-15
receptor signaling protein activity		5.17835e-18	0.00112463		1.89142e-10			8.19611e-12							1.14538e-07	4.18887e-32
guanyl-nucleotide exchange factor activity		3.20625e-23	1.22523e-05	0.00651919	1.08699e-16			2.8111e-17				0.0030355	0.000371669		4.76409e-15	8.73938e-46
Ras GTPase activator activity		3.99437e-10			0.00163983			4.11056e-05								1.33547e-12
receptor binding		1.2054e-10			4.18215e-11			4.91452e-13		0.0051087					0.00176332	1.04674e-26		0.00294083
cytokine activity	3.4541e-05			4.33603e-10		1.11123e-05			4.55434e-08	2.22217e-10	0.00361299			2.7485e-06			1.82396e-07	2.73481e-11	0.00410642	0.00232584
cytokine receptor binding		0.0420905							0.00250334	0.000101961								4.80467e-05
hormone activity									0.0133747	0.00127319								0.000360313
potassium channel activity		1.67734e-08			0.0480304			0.000658474								2.00716e-11					0.0369829
iron ion binding		7.71361e-09						0.00363463	0.00722338	0.000742849						1.02386e-12		3.31667e-06
calcium ion binding	1.22907e-20	2.14847e-42	9.42137e-28	1.61639e-84	7.80345e-135	1.90135e-17	1.22319e-15	2.87011e-99	2.83894e-10	1.98169e-11	1.25018e-13	1.30182e-25	2.19854e-28	6.10866e-16	5.35766e-122	1.15012e-115	1.40678e-16	5.03675e-12	4.33872e-12	2.19949e-66	8.16332e-42	7.31488e-33	7.08427e-21	1.49568e-16	1.72395e-36
calmodulin binding		2.3642e-09			0.000812335			8.86366e-06								3.83353e-12					0.00377236					6.5211e-15
sugar binding		5.47673e-20	2.22884e-05		3.04989e-15			3.16526e-16					0.0364417		1.32407e-11	1.35407e-38					1.18329e-09	0.00229736	0.00737436		0.00318551	4.16906e-15
phospholipid binding		3.78368e-20	1.7584e-05		1.37851e-15			1.16733e-16					0.01393		1.67291e-12	5.9185e-39				0.0441705	5.38839e-10	0.000557914	0.00318311		0.000772331	1.90848e-14
protein C-terminus binding		1.4253e-13	0.000126912		4.69146e-10			7.89007e-12							1.50686e-07	1.93695e-21					5.23422e-07	0.00425588	0.00896539		0.0219758	5.14877e-07
growth factor activity	0.00283061			6.21537e-06		0.00146605			1.08629e-05	2.7614e-07				0.000247617			4.20251e-05	1.12055e-08								2.94442e-32		4.98032e-07	2.62845e-07	3.58368e-05
cytoskeletal protein binding		3.52024e-26	2.82343e-10	2.2822e-11	1.70879e-46			2.00052e-40				2.74984e-05	1.36629e-06		2.35554e-36	5.94867e-64				2.097e-11	1.70445e-17	3.57443e-09	2.14393e-06		3.34107e-09	7.33114e-20					1.51797e-12
transcription factor binding		1.19106e-15	0.00019619		1.48771e-18			1.13576e-19							5.93268e-11	1.47566e-35					8.81945e-08					1.30526e-35					7.09414e-05
translation factor activity, nucleic acid binding		1.59051e-08	0.0185725		0.000285393			5.10825e-06							0.0122702	1.76171e-11					0.00163227					6.43661e-06					0.0240921
UDP-glycosyltransferase activity	3.70079e-07			2.82321e-10		2.92692e-06			1.62351e-09	5.30318e-11	3.26758e-05			1.58521e-09			3.86789e-10	5.06501e-17	0.00023618	0.00369778				0.0248713		2.83253e-37	0.00282831	4.37898e-12	9.88375e-13	4.23753e-08		1.35223e-17	2.71763e-07	0.00039115
peptidase activity		2.85395e-22	2.08274e-05		5.15112e-29			7.67946e-27							2.2676e-19	6.19562e-57					3.56946e-11	0.00465036	0.0356828		0.0303394	8.89093e-45					3.0846e-07	0.0168949			4.13464e-12
cysteine-type peptidase activity		2.54303e-18	4.65298e-05		5.56068e-13			3.89107e-14					0.0137517		3.68132e-10	3.4965e-31					6.37695e-09	0.000742856	0.00655168		0.00121539	1.14699e-10					2.55138e-06				2.72963e-11
metallopeptidase activity		8.92297e-19	0.00122035		2.21812e-11			1.20388e-12							3.43808e-08	4.91283e-36					1.19812e-07					3.50216e-21					2.24755e-05				1.24078e-10
anion transmembrane transporter activity		1.46785e-09						0.00321575								1.49354e-12		0.000853526								9.21159e-25						6.73899e-05
primary active transmembrane transporter activity		1.5252e-06														8.27347e-09		0.00820584								1.66867e-20						0.000841151
tubulin binding		1.04866e-09	0.0459859		0.000387001			1.0635e-05							0.0332452	1.94989e-13					0.00176195					5.91955e-09					0.03089				0.000229063
lipase activity		1.01927e-09			0.0209884			0.000675085								7.68282e-14					0.0256206					5.83747e-15									0.000752062
oxidoreductase activity, acting on CH-OH group of donors		2.89689e-06							0.000214932	9.31467e-05				0.00235944		2.89458e-08	0.00581183	4.42667e-09								9.95069e-28		0.000126465	1.87119e-05	0.00158236		3.41698e-09				0.00227434	4.65101e-05	0.00230798
oxidoreductase activity, acting on paired donors, with incorporation or reduction of molecular oxygen		4.16789e-07							0.00457444	0.00164416						2.37035e-08		1.04033e-06								7.90928e-28		0.00214122	0.00043768	0.0195302		7.67442e-08				0.0245099	0.000954216	0.0426303
transferase activity, transferring one-carbon groups		1.98167e-11			9.40039e-05			7.51573e-07							0.0481084	9.52566e-20					0.00123447					1.2692e-22									0.00011506
transferase activity, transferring acyl groups	0.0109231	0.000708896		2.34896e-05		0.00475623			6.60869e-06	1.17668e-07				0.000275853		0.0188002	4.49063e-05	4.22573e-10								5.27697e-43		3.44434e-07	9.55288e-08	6.60406e-05		1.47267e-14	0.000509879			2.09062e-07	4.71933e-07	2.44151e-05
transferase activity, transferring glycosyl groups	1.58111e-08			2.8832e-17		1.34668e-08	0.0112674		3.98592e-12	2.09353e-15	1.43041e-05			1.00608e-10			3.86831e-12	1.47118e-19	2.97936e-05	7.76136e-06				0.00457129		1.01909e-62	0.000156589	1.97624e-15	4.87518e-16	1.80262e-10		7.63638e-28	9.00539e-12	3.22073e-05		1.60788e-18	4.03371e-14	6.75881e-13	0.0139094		2.45974e-05	0.000270315			5.85689e-06
transferase activity, transferring phosphorus-containing groups		1.55227e-21	0.000109735		3.20872e-32			4.73832e-28							1.02403e-18	4.11716e-59					3.33909e-10					2.36758e-64					3.0625e-06	2.32632e-07			1.01521e-10								0.0396414			8.22245e-06	3.40178e-17
nucleotidyltransferase activity		2.86963e-09			0.0109898			0.000176565								1.0193e-11					0.0170255					2.37197e-14									0.0103983												0.000983906
hydrolase activity, acting on ester bonds		3.9578e-20	7.68225e-05		3.87961e-28			5.06808e-26							7.84463e-17	5.57277e-50					9.0536e-10	0.0304723				1.18876e-52					4.52772e-06	0.000379964			4.80144e-10								0.0248506			1.10785e-05	2.44576e-16
thiolester hydrolase activity		4.31918e-13	0.0173095		8.57984e-06			3.64554e-07							0.000792762	1.37715e-19					8.48831e-05					2.90277e-10					0.00434882				1.35461e-06											0.00622429	1.13623e-07
hydrolase activity, acting on glycosyl bonds		3.02559e-12			6.06591e-05			1.63638e-06							0.0057076	4.12302e-19					0.000361305					5.75258e-13					0.0113658				5.83125e-06											0.0353773	7.47167e-07
hydrolase activity, acting on carbon-nitrogen (but not peptide) bonds		1.06695e-13	0.0352519		8.40717e-06			2.68689e-07							0.000654533	3.59267e-22					8.78393e-05					5.30668e-14					0.00286585				1.94541e-07								0.0412128			0.00713173	3.2149e-08
hydrolase activity, acting on acid anhydrides		4.03129e-20	1.15666e-05		1.31297e-32			3.48001e-29							6.07207e-20	4.27554e-50					8.65048e-11	0.00389761	0.0249486			2.50271e-47					8.15092e-07	0.0195127			2.27175e-10								0.00640484			1.26682e-06	2.44686e-17
hydrolase activity, acting on acid anhydrides, catalyzing transmembrane movement of substances		1.67724e-07						0.0431683								1.76986e-10										2.37913e-17						0.0332885															0.0429312
ligase activity, forming carbon-nitrogen bonds		1.14274e-23	1.68786e-06		1.25298e-22			1.26346e-22					0.00362479		2.30216e-17	2.75265e-50				0.00515796	2.55967e-12	8.40685e-05	0.00129067		0.000126048	7.70095e-21					1.14036e-08				9.91813e-15								5.56502e-06	0.00011416		1.69345e-09	6.74126e-20
ATPase activity		2.63235e-14	0.0325504		2.34158e-09			1.27518e-11							0.000214627	1.3706e-28					3.97845e-05					2.60778e-40					0.00733447	2.38015e-05			6.33897e-06												1.42405e-08
purine nucleotide binding		5.59776e-22	5.22195e-05		4.24999e-51			2.99587e-36							8.02206e-28	8.16533e-67					5.14768e-11	0.0434217				9.04454e-82					1.36536e-06	2.00719e-09			8.70586e-11											3.67587e-06	1.30387e-18
SH3 domain binding		9.44053e-12			0.000130376			4.17575e-06							0.0118878	1.34482e-17					0.000548525					2.46323e-11					0.0115315				1.02277e-05											0.0495805	1.84171e-06
serine hydrolase activity		7.271e-09						0.00180719								1.04037e-14		0.00184659								1.02992e-28						1.12073e-05			0.0351182												0.0106501
guanyl nucleotide binding		3.25763e-19	9.08112e-06		1.24651e-21			4.06587e-22							3.10764e-14	7.68851e-40					2.58516e-10	0.00181489	0.0117815		0.0270754	3.88393e-27					7.8256e-07				2.24543e-10								0.0032601	0.0397476		1.32188e-06	7.93288e-16
growth factor binding		4.8471e-13	0.00402658		2.14632e-07			8.82593e-09							1.22564e-05	1.00125e-20					8.08284e-06	0.0485452				2.87852e-07					0.000528237				1.32331e-07								0.0107606			0.000429556	5.93722e-09
enzyme binding		8.93824e-27	2.44144e-09	1.54229e-08	2.96449e-49			3.21959e-41				0.000869045	1.9697e-05		4.45811e-38	1.51659e-71				9.06855e-10	4.95533e-17	5.16719e-08	1.67672e-05		9.32024e-08	5.48507e-26					5.49404e-12				1.11395e-17				0.000663551	0.00798387			5.28963e-08	8.54772e-07		8.83974e-14	1.10955e-27	7.82465e-05
kinase binding		3.90779e-19	9.254e-06		2.21652e-16			1.97986e-17					0.0130284		9.19318e-13	1.16172e-36				0.0182249	5.12565e-10	0.000292656	0.00361979		0.00120949	1.99412e-12					3.45624e-07				8.73878e-12								9.67407e-05	0.00105477		1.49047e-07	1.87359e-15
protein domain specific binding		3.27956e-21	2.89019e-07	0.00300432	7.27398e-28			8.25677e-27				0.040571	0.00255698		1.00037e-20	9.89267e-48				7.5455e-05	1.61529e-12	2.03902e-05	0.000409733		8.03365e-05	1.06016e-19					7.4312e-09				4.48682e-13								1.38137e-05	0.000214941		2.49892e-09	1.32234e-19
cytokine binding		3.57301e-13	0.00475984		1.5302e-06			5.04124e-08							0.000209654	8.60652e-20					2.42789e-05					3.6501e-08					0.00154417				1.74103e-06											0.00333608	7.98242e-08
passive transmembrane transporter activity		4.66786e-16	0.0115628		2.72046e-11			3.46289e-13							4.51362e-05	3.48608e-33		0.00494132			5.4001e-06					3.95886e-45					0.00334626	1.03121e-06			4.41463e-06												4.01338e-09
active transmembrane transporter activity		7.40403e-13			5.22795e-05			1.56457e-07	0.0120764	0.000621371						3.476e-25		2.56216e-06			0.00353906					7.72402e-50		0.00975961	0.000985935	0.0195498		5.55536e-11			0.00110668		0.00217295										2.6843e-05
ligand-gated channel activity		9.6135e-11			0.0458347			0.00097961								6.43287e-16		0.0184629			0.026453					6.00042e-21						0.00472203			0.00233089												0.00078032
inorganic cation transmembrane transporter activity		8.62798e-07						0.00750103		0.0214174						7.60094e-12		0.00360783								3.91982e-32						1.74794e-06
substrate-specific transmembrane transporter activity		1.66214e-13			1.21623e-11			1.53219e-13	0.0101855	0.000111573					0.00282243	4.79671e-32		4.34422e-06			0.00025568					1.11222e-74		0.00443485	0.000505165	0.0123091		3.04924e-15			0.000519181	0.00462972	0.00163246										6.33946e-07
polysaccharide binding		0.000110363						0.0456754								5.12916e-06										1.07124e-18						0.00679286
peptidase inhibitor activity		2.76621e-16	0.000346846		1.32955e-10			4.37624e-12							1.54941e-07	1.00261e-26					2.20321e-07	0.0154957				6.7341e-13					3.99187e-05				3.94218e-09								0.00420732	0.0413619		5.20237e-05	1.25073e-11
GTPase regulator activity		5.51996e-23	5.93691e-06		3.40108e-26			2.05465e-25					0.0370167		4.4594e-19	7.12175e-54				0.0234518	8.27745e-12	0.000596648	0.00402803		0.00150056	2.12053e-33					3.44118e-08				6.75321e-14								2.91781e-05	0.00133286		2.06523e-08	6.45565e-20
protein complex binding		1.08251e-23	6.91555e-08	0.000401523	4.18741e-24			5.37724e-24				0.00211312	0.000108587		1.42865e-19	1.53811e-48				3.08302e-05	1.67702e-13	1.92741e-06	0.000102996		3.26722e-06	2.10794e-12					7.8071e-10				1.88856e-15				0.00187988	0.0142601			3.93819e-07	5.59907e-06		5.31594e-11	5.77382e-21	0.0172371
ribonucleotide binding		1.28221e-22	1.88648e-05		3.40664e-54			2.76468e-38							1.04826e-30	8.60613e-69					9.48918e-12	0.0122732				1.79334e-77					3.53409e-07	8.98687e-08			1.42316e-11								0.0137515			5.65643e-07	6.13833e-20
phosphoric ester hydrolase activity		4.90676e-21	1.60676e-05		2.99812e-21			1.16488e-21							4.44711e-15	1.01947e-44					1.56612e-10	0.00145583	0.00735704		0.0043479	3.40613e-28					3.42307e-07				4.35972e-12								0.000215749	0.00460703		2.51143e-07	1.93945e-17
identical protein binding		2.96123e-25	4.64065e-08	3.44628e-05	2.37158e-45			4.50806e-38				0.0192311	0.000595778		2.30669e-33	1.45858e-67				7.08629e-07	3.3404e-15	2.22324e-06	0.000209707		7.47016e-06	4.75002e-34					2.46148e-10				1.02163e-15				0.0160672				2.67122e-06	3.21729e-05		1.27842e-11	5.52696e-25	0.0280835
cation binding		6.48721e-17	0.000279831		6.19067e-49			1.51756e-32		0.0435579					6.47144e-20	4.58227e-47		0.0134355			2.6496e-08					4.26165e-88					0.000162623	7.09696e-12			2.59522e-06											0.00421931	1.345e-12
ATPase activity, coupled to movement of substances		1.95986e-08						0.00919093								4.291e-12										1.8806e-16									0.0161912												0.00720595
sequence-specific DNA binding		2.88612e-05		5.51145e-06		0.0309674		0.000636727	8.08375e-05	2.4382e-07				0.0332282		4.47816e-08	0.00324252	1.10636e-07								2.7123e-68		1.00998e-05	2.92256e-06	0.00037712		1.21691e-18	0.00029294			1.71675e-07	1.50189e-05	0.0023413										5.38604e-06
structure-specific DNA binding		3.52456e-05														7.39807e-07										1.68826e-22						0.000931307
DNA regulatory region binding		6.22487e-10			0.00181394			2.92509e-05								3.25674e-14					0.00530576					4.72276e-15									0.000576268												6.65224e-05
metal ion transmembrane transporter activity		1.53863e-18	0.00135563		7.32431e-10			6.432e-11							6.23141e-08	1.79211e-33					1.58473e-07	0.0397386			0.0379279	7.60984e-13					1.53149e-05				1.43015e-11								0.000521571	0.00932659		1.13024e-05	9.71079e-13
protein heterodimerization activity		1.41706e-16	0.000456177		5.96236e-12			1.49024e-13							6.43828e-08	9.44994e-31					1.41679e-07					4.97329e-19					5.0343e-05				1.20803e-08								0.0373462			0.000121551	1.34162e-11
protein dimerization activity		5.90493e-23	3.20611e-07	0.00577754	3.39685e-36			2.85502e-32					0.00489861		6.57057e-26	4.69828e-58				7.55705e-05	2.06746e-13	2.60934e-05	0.000875437		0.000155809	1.11053e-31					4.72512e-09				8.92463e-14								3.46649e-05	0.000434355		9.17652e-10	1.31434e-21
coenzyme binding		7.45027e-09		0.0187292					3.57611e-05	6.38474e-06				0.000651451		1.12651e-13	0.00139513	1.30676e-10								8.27359e-39		1.36377e-05	1.25808e-06	0.000298583		2.50228e-12				0.000109318	6.45301e-06	0.000415101										0.00307097
GTPase binding		3.20426e-18	6.24147e-05		2.05561e-11			2.36668e-12				0.0406612	0.00530195		9.17361e-10	9.43948e-31				0.0456238	1.04037e-08	0.000765295	0.0016582		0.000363299	2.41194e-06					8.04256e-07				1.61497e-12				0.0292789				2.17107e-06	0.000144261		2.84921e-07	4.83716e-14
unfolded protein binding		3.79107e-14	0.000282288		4.11644e-09			3.93198e-10							3.55604e-07	6.17033e-23					6.31204e-07	0.00566756	0.0281716		0.0127604	0.000781086					3.96326e-05				1.36455e-08								0.00193084	0.00904172		1.83861e-05	3.44525e-10
endopeptidase regulator activity		1.28955e-16	0.000194039		4.70102e-11			1.86384e-12							3.91955e-08	1.97235e-27					1.01045e-07	0.00723291	0.0260735		0.0230489	1.06304e-11					1.76509e-05				1.18334e-09								0.00134878	0.0154472		1.76075e-05	3.57812e-12
[truncated: 41 more columns]

## Sheet: hydrophobicity
Class	magnesium ion binding	peptide receptor activity	G-protein-coupled receptor binding	purine nucleoside binding	DNA binding	transcription coactivator activity	transcription corepressor activity	RNA binding	motor activity	GTPase activity	carboxylesterase activity	helicase activity	nuclease activity	protein tyrosine kinase activity	receptor activity	olfactory receptor activity	receptor signaling protein activity	guanyl-nucleotide exchange factor activity	Ras GTPase activator activity	receptor binding	cytokine activity	cytokine receptor binding	hormone activity	potassium channel activity	iron ion binding	calcium ion binding	calmodulin binding	sugar binding	phospholipid binding	protein C-terminus binding	growth factor activity	cytoskeletal protein binding	transcription factor binding	translation factor activity, nucleic acid binding	UDP-glycosyltransferase activity	peptidase activity	cysteine-type peptidase activity	metallopeptidase activity	anion transmembrane transporter activity	primary active transmembrane transporter activity	tubulin binding	lipase activity	oxidoreductase activity, acting on CH-OH group of donors	oxidoreductase activity, acting on paired donors, with incorporation or reduction of molecular oxygen	transferase activity, transferring one-carbon groups	transferase activity, transferring acyl groups	transferase activity, transferring glycosyl groups	transferase activity, transferring phosphorus-containing groups	nucleotidyltransferase activity
magnesium ion binding
peptide receptor activity	1.29105e-36
G-protein-coupled receptor binding		6.49303e-28
purine nucleoside binding		3.05672e-59	0.00575926
DNA binding	2.35012e-34	1.29214e-65	4.56603e-39	6.38363e-195
transcription coactivator activity	7.6184e-12	7.93178e-44	1.1105e-17	4.20886e-22
transcription corepressor activity	1.75942e-13	4.59824e-38	5.06595e-18	2.43019e-21
RNA binding	3.82829e-14	1.83591e-58	2.28001e-22	2.59851e-50	0.00050014
motor activity	7.05935e-11	4.63824e-37	1.52286e-15	2.35481e-16
GTPase activity		2.9007e-42			4.9187e-51	2.67727e-17	4.6635e-18	8.19281e-20	1.68896e-15
carboxylesterase activity	0.000899266	2.74591e-26		8.37054e-09	4.53917e-42	5.63284e-25	1.57631e-23	5.53473e-28	4.10463e-23	1.21641e-09
helicase activity	0.00181049	2.63794e-37	2.4847e-09	1.26364e-05	7.37929e-09					8.6151e-06	2.24533e-19
nuclease activity		1.90392e-37	0.00536952		5.14959e-25	5.65805e-07	8.00338e-09	7.4381e-08	5.12708e-06		1.9045e-09
protein tyrosine kinase activity		1.95184e-35	0.0333187		1.98274e-25	1.09619e-08	2.44606e-10	1.51405e-08	5.96276e-08		8.15555e-10
receptor activity	3.10267e-30	0.0167476	7.39958e-13	3.65229e-187	0	4.43164e-80	6.9478e-61	1.64456e-204	5.65205e-57	3.60757e-44	1.27773e-05	2.00035e-48	1.18905e-39	8.48804e-33
olfactory receptor activity	2.7515e-75	4.17678e-44	7.19468e-66	4.73872e-217	3.85314e-232	1.8916e-91	4.41872e-70	6.19073e-175	6.48086e-68	9.72151e-92	5.94569e-51	1.20599e-68	7.75593e-77	1.8992e-66	8.22836e-111
receptor signaling protein activity		1.42187e-36	0.00090813		4.63979e-22	9.55072e-06	1.45087e-07	6.50411e-06	5.35446e-05		7.09781e-12				3.3799e-41	1.54964e-74
guanyl-nucleotide exchange factor activity	0.000644462	1.66898e-37	8.58595e-10	1.24501e-06	1.16002e-12		0.00384651			2.57466e-08	7.58596e-21			0.0150434	1.67207e-52	9.06929e-71
Ras GTPase activator activity		2.10826e-30	1.36152e-05		2.71633e-10		0.00203935			0.0203474	7.38928e-13				1.10756e-31	8.19782e-52
receptor binding		2.19124e-52	0.0378879		2.96684e-121	1.689e-17	1.00251e-17	2.44631e-36	3.61296e-13		8.94867e-07	0.000668439			4.90104e-128	3.62524e-185		0.000222481
cytokine activity	0.00262257	1.99227e-31		1.06245e-10	1.53911e-64	1.24545e-27	7.048e-26	4.61267e-38	4.52988e-24	7.2664e-07		4.49215e-17	4.31456e-08	3.28854e-07	9.07558e-14	2.73887e-83	1.95496e-09	6.51491e-18	9.89933e-11	3.8925e-08
cytokine receptor binding	0.00864968	1.57248e-33		2.34361e-09	2.74503e-62	1.60709e-27	4.19457e-26	2.10663e-36	4.06596e-24	2.8667e-06		6.92401e-17	1.1116e-07	5.50005e-07	1.32369e-14	1.26525e-81	3.36303e-09	4.71367e-18	1.87479e-10	4.72533e-07
hormone activity		2.6798e-27			4.78748e-22	3.47955e-09	1.41963e-10	7.5805e-11	1.73979e-08			0.00177594			3.5827e-15	1.67464e-53		0.000539375
potassium channel activity	2.70359e-05	2.61308e-26		4.00051e-12	3.2653e-51	2.52914e-27	9.67779e-26	9.33569e-34	1.73785e-24	2.22823e-10		1.65633e-19	1.5561e-10	1.93028e-10	3.67705e-06	9.30686e-63	3.02699e-12	3.46009e-20	4.1934e-13	1.66763e-09
iron ion binding		7.14158e-36		1.93241e-08	1.48215e-72	6.90605e-30	3.32357e-28	7.40368e-40	2.57842e-26	1.65838e-05		8.42973e-18	3.6524e-07	9.82545e-07	9.19936e-20	1.19628e-90	1.6591e-09	1.05962e-19	3.84337e-11	2.58809e-06
calcium ion binding		4.24381e-56	8.51063e-08	0.00253334	8.55738e-77	3.40336e-11	8.61731e-13	3.02775e-18	1.03256e-08		6.91064e-18				6.54324e-138	2.22211e-165					6.51085e-19	8.32976e-18		3.31624e-20	1.82422e-18
calmodulin binding	0.00518299	6.96354e-36	3.31235e-08	7.95192e-05	8.60869e-06					0.000100364	3.23274e-14				7.43904e-44	3.4873e-67				0.00136608	6.34199e-14	1.3388e-13	0.00612865	1.18639e-15	3.66586e-14
sugar binding		1.36888e-38			2.56771e-49	2.02063e-17	1.97648e-18	5.04112e-20	1.25655e-15		4.59831e-07	5.26082e-06			5.03559e-37	1.36145e-85		9.68323e-09	0.0035175		0.000173231	0.000478133		1.50922e-07	0.00248175	0.0452215	2.62737e-05
phospholipid binding		1.51079e-38	1.05172e-06	0.0121041	3.19721e-18	0.00968378	4.82218e-05	0.00323137	0.0313998	0.00476705	1.5415e-14				1.36283e-52	1.38454e-82					1.4376e-13	2.58117e-13		1.78439e-15	5.90664e-14			0.00153368
protein C-terminus binding		1.32022e-34	6.01184e-06		4.60925e-09		0.0291758				9.7114e-11				1.08384e-39	5.71709e-69					1.24976e-10	3.01727e-10		2.67564e-12	2.12702e-10			0.0170534
growth factor activity		4.68966e-36			4.44388e-27	1.47083e-08	3.66507e-10	4.14488e-10	1.49808e-07		2.79025e-05				6.71521e-33	6.7241e-75					0.000185977	0.000442042		1.42906e-06	0.001641
cytoskeletal protein binding	3.23022e-17	1.59635e-53	2.18943e-23	2.02687e-48	0.00145043					5.29901e-25	3.33224e-30		2.02448e-10	6.45954e-12	2.16826e-166	2.66786e-150	1.05026e-08	0.0296801	0.0138929	1.45693e-35	2.51452e-39	3.00901e-38	3.26863e-12	4.59724e-35	3.4023e-43	4.99663e-22		3.43904e-25	5.38823e-05		2.86927e-12
transcription factor binding	8.13312e-15	2.26517e-55	3.83051e-22	8.29205e-43	6.44428e-07					2.48334e-22	1.95652e-29		2.47155e-08	4.88176e-10	4.38117e-165	2.94577e-151	1.11148e-06			2.15033e-31	2.66175e-37	2.52938e-36	4.8344e-11	6.77598e-34	2.05444e-40	4.05605e-18		1.82229e-22	0.00237987		2.09012e-10
translation factor activity, nucleic acid binding	0.00598688	5.08036e-30	3.84699e-07	0.0005976						0.00417601	4.20864e-11				5.02442e-31	5.74378e-51				0.00308288	2.50908e-11	3.65063e-11	0.00805089	1.21244e-12	5.58884e-11			0.00121248
UDP-glycosyltransferase activity		7.84175e-30		0.000493756	5.93493e-45	3.10525e-22	2.90315e-22	2.75161e-25	9.1977e-21	0.0182109		5.41484e-13	6.76504e-05	0.000852684	2.99773e-12	4.17374e-61	2.18404e-06	1.50989e-15	4.41211e-09	0.00343707						7.02782e-11	5.16421e-11		4.93053e-10	7.33105e-08	0.0454181	8.04202e-29	2.67294e-27	2.51049e-08
peptidase activity		6.00482e-51			1.74015e-128	9.13937e-28	2.94579e-26	7.72126e-47	3.67725e-22		1.75641e-05	6.4881e-10			6.01489e-84	1.26295e-157	0.04909	4.05615e-12	7.81904e-05		8.26886e-05	0.000668114		2.55596e-07	0.00836123	2.47449e-08	1.04793e-08		9.11935e-07	3.23191e-05		3.51171e-50	1.67812e-45	2.50972e-06
cysteine-type peptidase activity	0.0227443	1.44714e-37	1.2462e-08	0.00029556	3.90838e-15		0.00018488			1.69981e-05	8.88293e-20				7.18737e-49	2.29503e-69				0.0154501	3.8783e-16	4.05439e-16	0.00575083	3.27764e-19	1.98086e-17			5.74822e-06				0.000789499	0.0375096		2.11439e-13	3.9641e-09
metallopeptidase activity		9.70185e-39	0.0354641		2.08096e-38	1.43876e-12	3.88162e-14	3.18427e-13	2.52923e-11		5.97624e-11	0.020358			2.15324e-41	3.4917e-81		0.000440038			1.50277e-07	4.3068e-07		6.07501e-11	7.0995e-07		0.0217967					5.06747e-18	1.74618e-15		0.000384361
anion transmembrane transporter activity	2.56193e-23	1.0969e-11	3.19218e-09	2.37791e-44	9.15868e-76	1.85933e-43	2.73504e-38	1.74536e-59	2.48625e-37	1.70576e-33	3.36198e-09	1.11015e-35	4.22742e-29	1.06199e-28		2.77669e-66	4.50425e-30	4.77268e-36	3.45435e-26	1.61128e-36	1.06751e-09	1.48506e-11	4.04865e-13	2.0282e-06	5.46755e-16	3.28567e-50	1.44412e-30	1.33176e-28	4.22775e-33	2.0112e-27	6.31656e-24	3.82515e-56	6.94181e-57	4.52702e-25	2.25003e-12	1.22412e-34	5.68171e-36	5.47857e-31
primary active transmembrane transporter activity	2.59454e-16	2.57504e-20	0.00238821	1.37185e-27	1.45791e-53	1.24457e-32	8.89441e-30	1.71609e-42	5.42679e-29	6.5779e-24	5.8476e-05	5.48073e-27	1.42622e-20	7.397e-21		7.58522e-51	6.13685e-21	1.14725e-26	6.24782e-20	4.99009e-22	0.000549003	3.21516e-05	1.6714e-07	0.0465334	8.13715e-10	7.13476e-34	2.56029e-22	1.62066e-19	1.42495e-23	1.98052e-19	9.18026e-16	1.88333e-40	9.75702e-41	3.70359e-19	2.46536e-06	2.8135e-21	9.16417e-27	7.82251e-22
tubulin binding	1.41032e-11	1.44716e-31	4.91193e-15	1.56717e-15						2.29683e-15	2.45767e-21		3.17199e-07	4.17063e-09	8.15258e-45	4.46818e-53	1.86843e-06	0.0170893	0.0100689	1.04589e-12	9.9899e-22	4.89223e-22	7.5085e-09	1.487e-22	3.44989e-24	1.47255e-09		3.70627e-16	0.00137591		2.21303e-08				5.87449e-20	8.51872e-21	0.000988389	2.35202e-12	6.37015e-32	1.98551e-25
lipase activity		2.64651e-24		0.00656896	1.61033e-34	1.87464e-18	2.65602e-18	4.09547e-20	4.73891e-17	0.0229624		1.88317e-11	0.000846782	0.00213601	5.39218e-09	6.36459e-52	2.84904e-05	1.55311e-12	4.05577e-07	0.039973						9.97679e-09	8.57355e-09		4.7945e-08	2.11826e-06		9.11484e-23	1.58994e-21	3.10725e-07			5.17963e-11	0.00144942	7.70776e-10	2.79661e-05	2.0145e-16
oxidoreductase activity, acting on CH-OH group of donors	1.74529e-14	1.72883e-24	0.0494084	1.09706e-25	1.24888e-57	9.62761e-35	9.0499e-32	1.41379e-43	1.8627e-31	5.92618e-23	0.0314518	9.06499e-29	3.00372e-20	1.21334e-20		4.24843e-57	1.62153e-21	2.45925e-29	9.93218e-21	2.58071e-20		0.00999205	3.94867e-06		1.56071e-06	3.2559e-34	3.56538e-23	1.03629e-18	1.37832e-24	1.44619e-19	8.73276e-15	4.08413e-43	3.17369e-43	5.63482e-19	0.000122131	1.72666e-19	3.29237e-29	5.67782e-22			1.35827e-27	0.00212804
oxidoreductase activity, acting on paired donors, with incorporation or reduction of molecular oxygen		2.93235e-32		0.00071811	2.4182e-44	4.66748e-21	5.61563e-21	1.50873e-25	1.80733e-19	0.00106304		2.20398e-13	0.000148269	8.48427e-05	4.74643e-14	8.12593e-67	2.31893e-06	4.04162e-14	1.2388e-07	0.0152693						1.94495e-11	8.03178e-10		1.58133e-09	5.09161e-07		5.66324e-28	3.92093e-26	2.4715e-08			1.26777e-12	0.000182979	7.28549e-15	9.73577e-11	3.93736e-18		6.52727e-07
transferase activity, transferring one-carbon groups		1.07318e-37			1.46112e-24	5.39814e-07	9.58837e-09	2.75062e-09	5.92315e-06		7.86191e-06				2.00108e-36	3.24739e-80					3.11869e-06	1.52054e-05		4.12475e-08	0.000145189							1.49335e-10	8.70852e-09		0.0134762				1.29481e-26	4.22564e-19	1.39689e-06		1.92571e-17	0.0141486
transferase activity, transferring acyl groups	0.00154148	8.63926e-32		1.60149e-11	1.65222e-61	1.61223e-25	5.44058e-24	8.24417e-38	5.65482e-21	3.37411e-07		1.43635e-15	6.38514e-08	3.77359e-07	7.68926e-14	2.90024e-90	5.28763e-09	1.48906e-15	5.21263e-09	1.38888e-08						1.19976e-18	5.63345e-13	6.95546e-05	2.55136e-12	8.13674e-10	0.000135168	3.29031e-36	4.47251e-35	2.74159e-11		1.70809e-05	1.71846e-14	2.10905e-07	5.35868e-08		6.58399e-19				2.63524e-06
transferase activity, transferring glycosyl groups	0.000641374	7.32889e-34		1.20121e-13	6.34776e-93	5.70774e-36	5.27975e-33	1.03019e-50	1.2808e-30	2.43576e-07		6.77451e-21	7.47776e-10	3.87705e-08	1.61462e-19	4.04672e-99	5.54421e-12	4.27914e-24	1.31103e-13	6.77477e-11						9.60008e-25	1.62867e-17	4.38643e-05	1.32519e-17	2.27512e-13	1.31991e-05	1.86993e-53	4.75198e-51	5.07137e-13		6.35509e-06	3.80331e-21	2.83337e-09	2.84014e-13	3.44584e-06	1.49992e-27		0.000576229		1.21873e-06
transferase activity, transferring phosphorus-containing groups		5.55849e-56	2.51095e-05		2.75927e-119	1.72541e-16	2.90419e-17	6.00778e-31	1.16145e-12		9.84792e-14	0.0190857			8.65e-153	5.71781e-185		0.0015115			6.53916e-15	9.7649e-14		1.52308e-16	7.2579e-14		0.0231901					6.05796e-34	9.68347e-29		1.14428e-07	0.00051913			4.61761e-47	5.65547e-31	5.45586e-13	7.94522e-06	2.03908e-30	9.4914e-08		3.96592e-15	9.0653e-20
nucleotidyltransferase activity		1.66431e-33	0.00882228		3.24538e-15	0.000702021	1.03435e-05	0.000258376	0.00196704		4.67923e-08				6.72126e-31	2.70716e-62					7.41763e-07	1.64755e-06		4.71995e-09	7.0677e-06							1.09488e-05	0.00017769		0.000278262				6.3675e-25	6.66059e-18	0.000218039	0.00220344	1.91533e-17	0.00109015		7.92615e-07	2.71947e-08
hydrolase activity, acting on ester bonds		5.63014e-53			5.27818e-125	2.25817e-22	7.16747e-22	2.41937e-40	1.67919e-17		4.60485e-08	2.16908e-06			2.10641e-109	9.6916e-172		1.33724e-07	0.0405859		2.87271e-08	3.81518e-07		1.87272e-10	2.45705e-06	0.00249579	1.19687e-05		0.00261749	0.013285		8.21745e-43	9.02359e-38	0.0001848	0.00422775		5.33776e-05		5.02535e-39	1.48978e-24	7.48473e-17	0.038142	5.70513e-23	0.00730111		1.06261e-08	1.7515e-10
thiolester hydrolase activity		7.38667e-31	2.76102e-05		7.16497e-11		0.00104666				3.3971e-12				4.44746e-31	1.16076e-52					6.62064e-10	9.31871e-10		1.89939e-12	8.1201e-10			0.0260539				0.00486842			3.14443e-08	0.000593119			2.34632e-26	4.3193e-20	0.00355546	1.8821e-06	7.47491e-21	7.60864e-07		6.64971e-09	1.30098e-12
hydrolase activity, acting on glycosyl bonds		1.14478e-29			6.1397e-40	3.59106e-20	3.62193e-20	3.53936e-21	4.08328e-19			5.78637e-12	0.00727429	0.0169346	8.82228e-15	1.47021e-57	5.61168e-05	2.15861e-14	3.53099e-07					0.0469223		2.34803e-08	8.54151e-09		1.84981e-08	8.11906e-06		2.58075e-25	7.84482e-24	2.1014e-06			3.39239e-12	0.00603557	7.945e-18	7.52505e-13	2.95655e-18		1.62107e-10					0.000111309	0.0195755
hydrolase activity, acting on carbon-nitrogen (but not peptide) bonds		3.84451e-28			6.69969e-37	7.84873e-18	2.48803e-18	8.90769e-20	5.85409e-17			5.45937e-10	0.0192504		1.71255e-13	1.60732e-57	0.000744301	4.72219e-11	5.36067e-06							8.38712e-07	7.6918e-08		7.42159e-07	2.11857e-05		3.34573e-23	3.14885e-21	2.246e-06			1.77099e-09		2.70304e-14	5.68287e-10	9.78348e-17		1.49371e-07					0.000492184
hydrolase activity, acting on acid anhydrides		2.35609e-54	0.00130126		3.67212e-100	2.08872e-15	3.86131e-16	9.6355e-30	1.20491e-11		1.64921e-09	0.00692837			6.06751e-124	4.76112e-173		0.00204029			7.57302e-11	1.07952e-09		2.65933e-12	5.49881e-09		0.0167218					2.74371e-30	1.97817e-26	0.0264841	9.15497e-05				9.66269e-41	1.29555e-25	1.87546e-11	0.000997992	2.41705e-24	0.000154507		3.12077e-11	8.53801e-14
hydrolase activity, acting on acid anhydrides, catalyzing transmembrane movement of substances	3.97561e-14	7.72572e-21	0.0210838	1.65727e-23	6.69952e-46	1.14032e-28	2.31361e-26	5.84327e-37	1.29848e-25	2.74572e-21	0.00049712	3.81489e-24	3.98168e-18	1.14911e-18		3.27488e-47	1.64613e-18	9.94435e-24	1.01946e-17	1.43136e-18	0.00714329	0.000536926	2.74188e-06		3.35702e-08	1.57088e-29	1.18766e-19	2.58816e-17	1.13577e-20	5.67674e-17	1.08221e-13	5.65614e-35	2.3733e-35	4.96765e-17	2.82616e-05	3.32003e-18	6.29676e-24	1.99264e-19			1.59671e-22	0.000289609		3.773e-09	1.34228e-16		6.3471e-05	9.70241e-27	1.00914e-15
ligase activity, forming carbon-nitrogen bonds		4.66229e-45	0.000145467		1.28544e-37	1.56526e-08	2.27294e-10	1.51728e-11	3.884e-07		4.62464e-11				6.54162e-63	5.54669e-108					2.58335e-11	1.68408e-10		1.61911e-13	3.41884e-10							3.58366e-14	1.60844e-11		2.66406e-06	0.0347052			2.37313e-36	1.07292e-25	3.78869e-08	6.42337e-05	7.76731e-25	3.12573e-06		4.45074e-11	1.20136e-13
ATPase activity		3.43369e-43			8.3878e-62	2.6717e-17	2.12945e-17	4.5615e-28	1.2997e-13			1.60924e-06			8.52028e-45	1.46019e-115		7.28009e-07	0.017849					0.0180298		4.08186e-05	2.10468e-05		0.000761339	0.0052449		1.17949e-27	1.21865e-25	7.5253e-05			2.30944e-05		1.21012e-22	3.55204e-12	6.97922e-13		3.68358e-10					0.0320642
purine nucleotide binding		4.24411e-60	0.00699724		6.2097e-226	4.19769e-24	7.95469e-23	6.01231e-56	8.51121e-18		3.4537e-09	1.69882e-06			6.80758e-204	7.16247e-225		8.36943e-08			6.17154e-11	1.51999e-09		1.68938e-12	1.26968e-08	0.000119582	1.68839e-05		0.00219832	0.0218301		1.77369e-53	1.44835e-47	0.000266704	0.000603999		3.58602e-05		1.13325e-45	1.63157e-28	1.09968e-16	0.00646996	1.40252e-26	0.000471164		7.98927e-12	8.63236e-14
SH3 domain binding	8.79938e-07	5.25582e-32	1.45994e-11	1.36012e-09						1.6122e-10	2.5878e-19		0.00216434	3.93601e-05	1.58999e-41	6.54275e-54	0.00944682			2.38067e-07	1.07857e-17	8.39697e-18	8.79537e-06	1.47542e-19	2.68547e-19	0.000223702		4.86051e-11			0.000171404				3.22479e-16	1.81441e-14		2.71229e-07	1.08787e-30	4.6586e-24		1.92909e-13	7.42076e-26	3.24318e-14	0.00338488	1.70054e-15	6.34015e-23	4.0319e-07
serine hydrolase activity	0.000441325	1.22334e-34		8.34713e-12	1.02966e-67	2.05259e-31	2.48431e-29	1.16394e-40	1.00989e-27	6.28725e-09		1.14284e-20	5.69092e-10	2.07868e-09	2.68819e-13	3.34618e-80	4.83813e-12	2.3944e-22	2.84972e-13	5.36501e-09						5.1936e-22	3.02967e-16	3.58657e-06	2.23921e-16	1.43547e-12	1.66068e-05	5.66664e-43	2.98323e-41	1.37322e-12		5.40364e-06	1.04922e-20	3.40984e-10	1.82243e-12	1.97208e-06	4.06964e-25		0.00163687		5.41694e-07			1.97914e-17	2.01228e-08
guanyl nucleotide binding		2.51582e-49			9.05553e-87	5.49862e-23	2.32943e-22	5.54267e-33	6.3518e-19		9.771e-09	3.44165e-08			7.65333e-69	3.62939e-131		1.29318e-10	0.0017887		2.70001e-07	2.01815e-06		1.92989e-10	1.78411e-05	0.000110157	1.38401e-06		6.88853e-05	0.00259768		2.14978e-37	5.84186e-34	0.000166384			1.16136e-07		6.30594e-38	1.63846e-25	4.69886e-18		5.49819e-24	0.00380684		5.22449e-08	7.07491e-08
growth factor binding		7.02305e-31			3.00579e-23	2.08214e-09	7.73409e-11	1.7148e-09	7.36575e-09		6.37305e-05	0.00616583			6.23087e-22	5.71912e-56		0.000691966			0.00214184	0.00414116		5.26561e-06	0.0183456		0.0477659					3.57015e-12	1.27255e-10				0.025147		6.67786e-22	5.87287e-16	1.47874e-09		1.31896e-14			0.00166688	0.0023095
enzyme binding	0.00553719	2.93949e-53	1.45436e-10	1.42483e-11	1.20342e-42	0.00132461	7.02623e-06	1.52632e-07	0.0302068	2.54288e-05	3.26956e-18				3.68644e-143	5.80366e-162				2.26556e-07	1.52453e-21	2.39547e-20	0.00451834	2.08006e-21	9.08563e-22			2.64084e-06				1.32394e-08	5.53419e-06		9.03197e-14	2.07702e-16			1.30983e-47	6.97947e-32	0.0019646	1.1731e-10	1.57795e-32	4.47908e-13		5.77224e-21	2.21312e-29	0.00044772
kinase binding		4.17673e-41	1.79005e-06	0.029688	2.3888e-18	0.00938951	7.21053e-05	0.000994291	0.0491681		1.66125e-13				1.20339e-55	2.18061e-89					4.10595e-13	1.51608e-12		5.577e-15	6.09358e-13			0.012292				5.1626e-05	0.00190177		5.17094e-09	5.24759e-06			3.59679e-34	9.86484e-24	0.00344276	2.348e-07	3.65575e-24	2.35563e-08		1.84133e-12	1.127e-16
protein domain specific binding	6.9533e-08	1.06984e-48	2.55828e-14	5.91069e-20	9.47848e-11					1.00095e-11	1.32813e-19		0.00243196	0.000199204	6.28991e-113	2.10248e-132	0.0285325			9.25469e-15	1.28561e-24	1.20356e-23	4.53945e-06	2.83166e-23	1.10792e-25	7.02064e-07		1.54309e-12			7.09697e-05				6.4436e-18	8.96124e-25		9.10937e-08	6.1336e-44	1.63575e-30		6.29726e-14	1.90538e-31	3.36384e-16	0.00220979	7.28651e-23	2.19075e-33	8.27481e-13
cytokine binding	0.0028739	1.57132e-13		4.34812e-08	2.34484e-43	7.86548e-24	4.38429e-23	5.23658e-27	8.81737e-22	6.77396e-06		1.556e-15	1.07134e-07	6.92536e-07	0.000505619	3.78924e-53	1.25176e-09	4.70038e-18	6.14951e-11	5.00216e-07						4.33196e-15	3.31062e-13	0.000185288	5.62837e-13	4.00487e-10	4.65631e-05	7.72076e-30	1.08008e-28	3.44498e-10		0.000191992	6.10161e-16	1.30038e-07	0.00550422		1.81177e-20				5.41092e-05			1.23837e-11	6.21299e-07
passive transmembrane transporter activity	2.03552e-16	1.79407e-34		1.6961e-55	1.87844e-161	2.10404e-55	2.44048e-46	3.09528e-97	4.06589e-44	5.60371e-30		2.44413e-38	5.75038e-26	9.7023e-25	6.06945e-11	1.28724e-129	1.94263e-28	1.10415e-39	3.35127e-24	4.5513e-41			5.45591e-06		1.09877e-05	1.49866e-66	6.49031e-31	1.76547e-23	5.88088e-35	8.44276e-26	2.16814e-18	2.23556e-89	2.13845e-88	2.09906e-23	0.00207608	8.54427e-33	2.52953e-38	3.78592e-28	2.34958e-05		2.15851e-36	0.0356769		3.83217e-05	6.16813e-22		0.00197949	1.09687e-61	8.919e-21
active transmembrane transporter activity	1.50976e-51		7.66113e-30	5.62346e-135	3.02482e-178	1.31473e-74	1.74812e-59	5.24404e-133	1.74696e-57	9.33995e-68	2.44697e-28	6.95076e-57	1.65658e-55	7.76418e-51		1.75219e-101	4.88127e-54	2.50466e-57	2.02168e-41	3.25455e-108	6.77897e-38	2.0169e-40	2.79297e-31	2.03375e-27	9.03351e-50	2.0343e-118	4.78492e-52	7.28585e-59	1.41357e-60	1.45672e-49	4.52655e-50	2.77306e-114	1.75781e-117	1.93785e-40	7.15049e-34	1.0563e-96	3.27019e-57	5.14062e-59	4.31561e-05	3.46171e-13	1.16822e-45	1.05485e-26	8.35224e-19	8.73178e-42	5.14426e-56	8.62754e-36	4.01621e-46	4.55912e-123	1.12653e-45
ligand-gated channel activity	8.12863e-11	6.37325e-27		3.142e-22	4.55463e-60	2.6368e-34	1.15053e-31	1.82424e-43	2.12927e-31	3.9072e-21		2.76941e-28	4.59639e-18	1.90687e-19	0.0141919	3.29524e-62	1.14977e-20	3.64228e-29	2.67428e-19	2.32554e-17			0.000623479		0.00742828	4.06939e-33	1.24375e-21	8.57179e-17	1.22751e-23	7.98642e-18	2.35535e-12	6.9342e-44	3.3835e-43	1.28437e-17	0.041302	4.42929e-16	8.20019e-29	3.19796e-20	0.000340638		1.61123e-27			0.00633333	1.71326e-14			2.91045e-28	2.20178e-15
inorganic cation transmembrane transporter activity	1.87442e-25	0.00138759	1.89327e-12	8.40964e-56	2.59368e-96	1.42799e-47	1.93158e-40	6.47973e-72	1.53063e-38	1.05855e-33	5.37563e-10	2.75937e-35	5.73878e-30	1.24235e-27		4.10524e-71	2.87598e-30	5.637e-36	9.50107e-26	8.15536e-47	7.7361e-14	2.77518e-15	4.76968e-15	4.0882e-09	3.74463e-19	2.71337e-57	4.42661e-32	7.30401e-29	4.55329e-35	2.53684e-29	4.43156e-26	2.96038e-66	8.41441e-67	1.04603e-25	5.33007e-14	4.03061e-41	4.42507e-35	3.90479e-31			2.07307e-32	5.65171e-11	0.000482733	6.57374e-17	8.08219e-29	5.13598e-13	7.91585e-17	1.4891e-55	1.38027e-25
substrate-specific transmembrane transporter activity	5.89911e-34	7.6033e-16	1.92953e-12	4.19267e-149	4.4522e-308	8.8967e-77	1.24622e-59	1.69508e-170	1.15526e-56	6.79077e-53	1.26011e-09	5.74461e-52	2.76657e-43	4.68346e-39		8.78199e-160	2.66925e-44	1.89979e-53	6.45983e-34	3.22161e-106	1.1907e-14	1.49976e-16	1.04787e-16	1.23284e-07	2.53902e-24	9.39459e-128	6.33889e-45	2.2498e-43	1.53115e-53	2.18185e-40	3.29376e-35	1.08426e-141	1.18154e-142	3.34738e-33	4.07e-15	8.61621e-82	4.84484e-52	1.24443e-46			1.83904e-44	2.39068e-11		1.7297e-19	6.65106e-41	1.42347e-12	1.80039e-21	4.82403e-134	4.45635e-34
polysaccharide binding		1.44826e-37	0.000869031		5.83209e-19	0.000260004	2.45568e-06	2.81021e-05	0.000885198		1.34992e-09				1.57733e-40	2.77144e-76					5.99915e-09	1.66647e-08		4.41809e-11	2.8874e-08							7.76448e-07	2.962e-05		2.35154e-05				6.08999e-29	2.80539e-20	0.000100611	0.000163411	5.32368e-20	1.45343e-05		1.50057e-08	1.29426e-10
peptidase inhibitor activity		1.49092e-34		0.0458937	8.5925e-46	2.6424e-20	3.99251e-20	8.95318e-25	3.57688e-18			1.12316e-11	0.00459746	0.0102585	4.29685e-19	1.44493e-73	6.93522e-05	6.46876e-13	1.56898e-06							2.62142e-09	7.59565e-09		6.21234e-08	1.09678e-05		2.08984e-27	1.41103e-25	4.91454e-07			3.37772e-11	0.00705086	3.32728e-18	1.32342e-11	2.63705e-17		7.13795e-09					9.44214e-06	0.00957415
GTPase regulator activity	7.89705e-10	1.01841e-52	8.43333e-18	1.08429e-25	1.42404e-22		0.0124616			1.61498e-17	1.72748e-28		0.000353753	1.06305e-06	5.20813e-135	3.30499e-136	0.00424523			7.75153e-18	4.85225e-32	2.51495e-31	5.20571e-08	6.74766e-31	2.85e-35	6.29215e-09		3.9599e-18			7.47966e-06	0.0389866			6.58936e-25	3.63773e-33		7.10586e-11	8.85167e-54	2.43357e-38		6.08103e-19	1.64062e-41	1.38157e-22	0.000201317	2.16312e-28	6.21428e-45	3.00218e-16
protein complex binding		1.01614e-39	0.00729361		1.2395e-31	1.86277e-07	2.29513e-09	2.16099e-10	4.34379e-06		4.15076e-08				9.60453e-51	3.73632e-98					6.05791e-08	2.38045e-07		7.02003e-10	4.55225e-07							5.40034e-12	4.88577e-10		0.000297286				3.12115e-29	1.57656e-19	7.39586e-07	0.0024515	7.62179e-19	0.000433509		1.043e-07	6.99405e-10
ribonucleotide binding		3.33948e-60	0.00153645		7.44797e-211	2.49607e-22	1.67648e-21	3.40308e-51	1.79843e-16		2.7071e-10	1.93934e-05			2.59783e-207	4.28354e-223		1.25586e-06			3.37063e-12	9.02244e-11		1.2547e-13	4.47439e-10	0.00824396	0.000116642		0.0186108			1.60198e-49	1.04934e-43	0.00103795	8.29554e-05		0.000408456		7.82432e-47	2.12868e-29	1.14982e-15	0.00119155	9.49589e-28	5.42549e-05		5.94813e-13	1.48976e-15
phosphoric ester hydrolase activity		1.31639e-44			2.87205e-72	3.53526e-19	1.3052e-19	4.36319e-27	4.60463e-16		1.1119e-06	1.36189e-05			1.56913e-59	8.62582e-122		4.9381e-07	0.0374553		1.85382e-05	0.000106223		5.9065e-08	0.000369494		3.21423e-05		0.00634537	0.0167054		2.4391e-31	9.13797e-28	0.000386835			0.000137367		6.04285e-31	1.77335e-19	5.65898e-16		2.12181e-18			1.58896e-05	4.85029e-07
identical protein binding		4.52307e-49	0.00130159		2.40384e-74	8.59132e-11	3.72805e-12	3.05398e-22	1.25455e-07		1.1829e-07				2.25318e-111	1.52254e-166					5.77303e-10	8.20394e-09		9.87573e-11	1.78717e-08							1.49847e-21	3.6383e-18		8.23351e-05	0.0380921			3.50395e-35	1.1635e-21	4.69593e-08	0.00250184	2.0859e-20	0.000578768		7.63487e-10	3.19836e-13
cation binding	8.80427e-06	6.35179e-63	1.08181e-14	3.78991e-41	1.3123e-93	0.0261076	0.000101854	1.04319e-09		7.4579e-09	4.63104e-21				0	3.62696e-246				4.9964e-23	7.17906e-30	7.57128e-28	7.60901e-05	1.17658e-26	3.74149e-30	0.000376738		1.34096e-09			0.0109572	1.08025e-08	1.36163e-05		2.48275e-17	1.41756e-33		0.000404573	1.66851e-58	1.16002e-38		2.5707e-13	7.07063e-39	2.80225e-17		6.84901e-30	1.54266e-41	6.69871e-15
ATPase activity, coupled to movement of substances	7.50677e-15	1.32311e-20	0.00964789	1.47042e-24	1.41894e-47	8.92821e-30	1.94461e-27	2.77235e-38	1.16912e-26	3.10628e-22	0.000205448	3.97076e-25	5.62767e-19	1.63972e-19		8.80041e-47	2.3588e-19	1.05362e-24	1.63871e-18	1.76063e-19	0.00304543	0.000209093	9.48134e-07		9.23187e-09	1.04834e-30	1.62174e-20	3.82954e-18	1.35161e-21	8.78867e-18	2.13455e-14	2.47978e-36	1.12078e-36	7.04785e-18	1.03964e-05	4.25828e-19	6.623e-25	2.61233e-20			1.8404e-23	0.000116973		1.02272e-09	2.04603e-17		2.21266e-05	7.3038e-28	1.72229e-16
sequence-specific DNA binding	3.10145e-23	1.79516e-58	1.20519e-29	1.21657e-73	0.00014511					4.20122e-36	1.17732e-37	0.00846255	4.39255e-15	1.58979e-17	3.15628e-218	2.173e-165	3.95863e-13	7.20112e-05	8.50925e-05	1.5356e-52	1.92746e-49	1.65479e-48	4.77521e-16	4.10802e-43	1.33025e-55	3.4385e-35		8.99663e-36	2.7765e-08	0.00859562	3.13186e-17				1.49259e-37	2.07298e-72	3.96252e-07	1.26195e-26	3.35632e-65	2.21746e-47		5.70717e-29	1.7157e-51	1.86473e-35	1.67482e-14	7.39395e-45	8.4597e-70	3.79321e-52	9.11788e-09
structure-specific DNA binding	2.81274e-07	3.65488e-38	9.04372e-13	9.3319e-12						2.98308e-10	4.80458e-20		0.00296625	0.000128501	7.34468e-55	1.69542e-71	0.028077			2.59727e-09	2.19464e-20	2.31339e-20	3.15006e-06	1.46284e-21	1.62614e-21	0.00011923		9.45191e-11			0.000102845				1.48215e-16	2.31274e-16		9.54216e-07	1.84523e-36	5.10408e-28		8.49729e-14	2.11038e-29	9.4564e-16	0.000835044	4.04082e-19	1.13488e-25	4.86992e-08
DNA regulatory region binding	3.22236e-09	1.20906e-35	2.97827e-14	6.39119e-14						1.25782e-13	3.19161e-23		7.31722e-05	7.22932e-07	1.76967e-51	2.61987e-62	0.000744457			4.43083e-11	8.84782e-22	4.18964e-22	1.04155e-07	1.68454e-23	4.32407e-24	6.09479e-07		8.42813e-14			2.38861e-06				3.37061e-19	3.79316e-19		2.13867e-09	3.84573e-36	6.83904e-28		2.48734e-16	1.36114e-30	3.87423e-18	2.50807e-05	6.21247e-20	3.54634e-28	2.44331e-10	0.00694004
metal ion transmembrane transporter activity	1.15493e-30		4.00777e-19	1.99044e-52	3.16233e-70	7.98056e-44	3.06805e-38	6.46583e-59	4.06293e-37	1.34172e-37	6.38366e-18	5.68741e-36	2.67807e-33	1.27803e-31		4.4082e-52	6.77684e-33	3.13025e-36	2.18209e-28	1.36825e-45	1.80019e-21	2.75063e-23	8.24239e-21	5.06272e-17	7.32253e-27	1.05026e-52	1.82802e-33	3.41442e-33	5.78658e-36	1.60599e-31	2.03593e-30	6.03888e-55	3.38377e-56	8.6098e-28	2.57319e-21	2.69058e-43	4.31937e-36	1.42785e-34	0.00322925	1.43688e-08	6.49112e-32	1.51058e-17	3.17319e-12	1.25359e-24	8.35673e-33	1.07598e-20	3.9146e-24	1.5153e-51	1.9283e-29
protein heterodimerization activity		4.21135e-37			3.60309e-29	1.71762e-07	2.82435e-09	7.90338e-12	6.38487e-06		0.0100511				6.00788e-38	1.88233e-91					0.00201174	0.00679839		0.000111267	0.0328305							1.08628e-11	4.36837e-10						2.01066e-21	2.51079e-12	2.09568e-06		4.78978e-11			0.00209379	0.000209841
protein dimerization activity		1.50666e-49	0.0054369		2.04675e-68	5.02462e-11	1.70164e-12	9.15239e-22	4.22016e-08		7.47781e-07				5.47776e-98	9.26841e-158					7.08645e-09	7.86906e-08		8.89705e-10	2.4021e-07							3.4087e-21	3.55586e-18		0.000489807				4.18164e-34	1.86335e-20	2.17163e-08	0.00689083	3.88536e-19	0.00265757		9.20061e-09	1.29793e-11
coenzyme binding	1.32089e-05	1.7032e-34		4.68081e-15	7.19579e-70	4.11344e-33	1.52062e-30	1.15781e-43	2.96991e-29	7.70061e-12		8.25133e-23	6.21146e-12	1.00411e-11	2.95345e-11	1.59697e-80	3.43786e-14	1.57177e-24	7.65288e-15	1.68922e-11						6.5591e-26	9.41443e-18	1.37629e-08	1.45138e-18	6.17722e-14	3.9319e-07	3.584e-45	9.48291e-44	8.85937e-14		1.29242e-08	5.18046e-23	1.10717e-12	1.04565e-10	4.66508e-05	6.10833e-26		0.0436364		8.97175e-09			5.25804e-21	4.3792e-10
GTPase binding	0.000626102	7.12596e-32	1.15071e-08	9.59283e-06	0.00155599					5.87865e-06	2.21617e-16			0.0309461	3.71205e-38	3.76733e-55				0.000344286	1.30904e-14	1.25505e-14	0.000744673	9.45292e-17	1.49611e-15			6.71826e-07							1.97141e-12	1.34427e-09		0.00243335	1.61896e-29	1.63936e-22		3.00617e-10	6.01639e-24	2.15605e-11		2.28382e-13	1.69428e-18	0.00245839
unfolded protein binding	0.0017775	2.91144e-31	9.50901e-08	5.23649e-05						0.00024494	1.37152e-10				1.43786e-34	5.71912e-56				0.00044452	1.24411e-11	1.52199e-11	0.00388236	1.65482e-12	2.35682e-11			3.63001e-05							1.57604e-09	5.51879e-08		0.00590688	8.08474e-25	7.7353e-19		1.61088e-07	1.07487e-18	8.92698e-08		2.65882e-11	1.39879e-14	0.00417214
endopeptidase regulator activity		1.47084e-34			2.54778e-43	3.63724e-19	3.25802e-19	4.29413e-23	2.84861e-17			8.97065e-11	0.0179624	0.0409133	1.88863e-19	7.79721e-72	0.000345064	5.65524e-12	6.57005e-06							3.95511e-08	3.82697e-08		3.67185e-07	4.45247e-05		8.89996e-26	5.92199e-24	1.69707e-06			2.97975e-10	0.0317045	9.91883e-19	3.5965e-12	1.44321e-16		1.76871e-09					9.58626e-05	0.03047
[truncated: 41 more columns]

## Sheet: Mass
Class	magnesium ion binding	peptide receptor activity	G-protein-coupled receptor binding	purine nucleoside binding	DNA binding	transcription coactivator activity	transcription corepressor activity	RNA binding	motor activity	GTPase activity	carboxylesterase activity	helicase activity	nuclease activity	protein tyrosine kinase activity	receptor activity	olfactory receptor activity	receptor signaling protein activity	guanyl-nucleotide exchange factor activity	Ras GTPase activator activity	receptor binding	cytokine activity	cytokine receptor binding	hormone activity	potassium channel activity	iron ion binding	calcium ion binding	calmodulin binding	sugar binding	phospholipid binding	protein C-terminus binding	growth factor activity	cytoskeletal protein binding	transcription factor binding	translation factor activity, nucleic acid binding	UDP-glycosyltransferase activity	peptidase activity	cysteine-type peptidase activity	metallopeptidase activity	anion transmembrane transporter activity	primary active transmembrane transporter activity	tubulin binding	lipase activity	oxidoreductase activity, acting on CH-OH group of donors	oxidoreductase activity, acting on paired donors, with incorporation or reduction of molecular oxygen	transferase activity, transferring one-carbon groups	transferase activity, transferring acyl groups	transferase activity, transferring glycosyl groups	transferase activity, transferring phosphorus-containing groups	nucleotidyltransferase activity
magnesium ion binding
peptide receptor activity	4.44528e-07
G-protein-coupled receptor binding	1.08889e-19	9.9347e-09
purine nucleoside binding		1.36028e-24	1.79991e-42
DNA binding		0.000668577	2.69187e-27	3.60114e-52
transcription coactivator activity			1.21555e-17	0.00564679
transcription corepressor activity			1.52925e-12	8.11567e-07
RNA binding	0.00903301		2.46209e-17	3.88073e-41
motor activity	1.96965e-07	2.16885e-15	1.14231e-23	9.30789e-08	3.98687e-21	1.91628e-08	7.98408e-10	2.94354e-21
GTPase activity	1.89164e-14		2.76884e-05	3.9969e-45	4.98117e-17	7.22206e-10	0.000708496	3.9197e-06	2.4472e-22
carboxylesterase activity	0.00188309		1.05077e-07	7.37521e-14					9.24408e-14
helicase activity	1.56917e-08	4.13945e-29	1.77865e-30	9.28856e-07	2.17834e-28	2.53529e-10	1.62209e-13	6.28623e-28		6.71642e-36	2.78408e-21
nuclease activity			3.32525e-12	4.26281e-06					3.37327e-10	0.000334125		3.08867e-12
protein tyrosine kinase activity	0.021451	4.44537e-22	1.13707e-25		2.86009e-16	0.00012962	4.93952e-08	1.16612e-17		7.70324e-29	2.58114e-15		6.50309e-07
receptor activity	1.1523e-07		1.69853e-20	1.28978e-102	1.82152e-12				1.00732e-23	3.7674e-09		8.3713e-37		3.85049e-26
olfactory receptor activity	3.17472e-41	3.09948e-44	0.00154946	2.65756e-149	1.87964e-69	2.95856e-23	1.31035e-12	2.21845e-21	6.16376e-33		5.3205e-07	4.197e-61	1.53494e-07	2.04303e-56	2.23514e-48
receptor signaling protein activity		2.33136e-09	8.85943e-19					0.00871748	2.15514e-07	6.18337e-13	0.000446937	9.06697e-08		0.0359195	5.18675e-08	1.99803e-38
guanyl-nucleotide exchange factor activity	3.70553e-07	7.13757e-25	1.31829e-29	1.77593e-05	6.27801e-25	4.5927e-09	6.112e-12	2.2517e-25		6.27912e-33	4.12393e-18		2.26984e-11		1.62408e-34	3.82419e-61	1.28285e-06
Ras GTPase activator activity		7.50067e-16	5.4779e-21		1.15793e-10	0.00556898	7.06019e-06	4.83961e-12		2.39314e-21	8.8965e-12		8e-05		1.55754e-16	1.77551e-37
receptor binding	8.71752e-13		4.00989e-07	6.14678e-92	3.06014e-34	1.34833e-09	0.0049019	1.66197e-08	1.0078e-25			9.40295e-35	0.00221551	1.23186e-25	2.0135e-16		9.20098e-12	2.94153e-33	3.31575e-18
cytokine activity	3.07189e-36	9.99832e-22		5.61824e-83	1.42391e-58	7.81995e-32	5.28862e-22	1.89298e-35	2.58304e-31	1.68477e-10	8.35852e-13	8.86873e-47	5.89349e-22	1.29315e-42	4.77264e-55	9.19601e-27	2.77765e-32	3.61921e-45	6.11195e-33	3.21714e-12
cytokine receptor binding	3.26717e-23	3.66683e-11		9.9152e-55	5.39823e-34	5.12691e-20	4.82572e-13	6.30825e-20	2.08747e-25	0.0009426	4.59556e-06	2.60266e-35	1.54598e-13	1.28499e-30	2.13753e-31	8.40442e-13	1.57787e-20	2.2579e-34	5.8156e-24	3.73629e-05
hormone activity	4.14497e-29	5.80338e-23		3.08446e-50	8.75067e-40	2.56614e-27	7.10112e-22	6.3553e-29	3.60324e-25	2.29622e-16	8.33689e-16	1.24047e-33	1.44379e-22	3.66678e-31	5.37119e-42	3.27579e-30	5.34715e-26	4.98683e-33	3.5866e-26	1.62372e-15
potassium channel activity			1.67095e-11	2.43347e-10					1.6152e-12	0.000673473		1.44156e-18		3.23919e-12		2.87205e-13		2.71291e-16	3.52719e-09	0.041984	1.71736e-23	3.69341e-13	8.31876e-22
iron ion binding		0.0398022	1.0273e-15	3.21526e-15					6.8081e-17	0.000304329		1.78448e-23		2.40733e-15		2.8172e-20		2.61088e-20	1.55504e-11	0.000374701	7.606e-27	9.86227e-15	1.49488e-24
calcium ion binding		1.75318e-07	9.56368e-26		8.3105e-07			6.77258e-09	5.10084e-09	7.574e-20	4.96863e-05	7.52814e-09		0.00389951	1.59989e-16	2.59182e-47		5.38183e-08		1.10818e-29	2.73202e-46	8.70469e-30	9.41152e-34		8.61241e-05
calmodulin binding		4.63581e-12	1.10544e-22		4.7649e-10	0.00657934	5.85131e-05	3.05475e-12		6.64452e-20	3.97434e-09		4.95669e-05		1.70407e-15	5.06656e-32				1.89512e-20	3.08953e-34	1.23979e-25	1.2804e-27	5.12651e-07	8.06296e-09
sugar binding	0.00650845		1.66732e-11	2.54807e-17					6.17222e-14			9.32938e-21		1.91748e-13		9.25244e-05	0.0108648	1.95136e-18	9.27245e-10		1.04785e-21	5.07596e-12	2.18442e-23			0.00011277	7.70339e-09
phospholipid binding		0.00379888	9.4878e-18	0.0057421					6.31469e-08	1.9381e-09		1.93091e-10		0.000157651	0.000145367	1.90978e-42		7.05033e-09	0.00393619	1.16506e-09	2.73255e-32	3.04042e-20	2.46904e-27				0.0187441
protein C-terminus binding		0.0350096	7.13657e-16						2.91244e-05	4.8603e-09		2.46911e-06			0.0469694	3.40406e-20		2.38675e-05		2.93548e-08	3.1842e-27	1.36201e-17	1.00677e-24
growth factor activity	6.56763e-21	2.38941e-06		8.22945e-50	1.48829e-25	3.31166e-15	1.0522e-08	1.71589e-12	2.1796e-23		0.00415698	3.1926e-37	1.35703e-08	6.73039e-32	5.23609e-18		7.04314e-19	1.27082e-34	2.10875e-24		0.00952432		9.69215e-10	1.43787e-09	6.20084e-11	3.6784e-24	3.56723e-23	2.3799e-06	5.11091e-16	4.68503e-14
cytoskeletal protein binding		7.79803e-08	3.41804e-27		9.90512e-09			6.65453e-12	2.12963e-05	5.20643e-21	1.21149e-05	7.37899e-05			1.91535e-20	2.02487e-52		0.000588354		4.34898e-32	7.14485e-48	2.5493e-32	2.00711e-35	0.00538352	5.26326e-05			2.89352e-06			4.3536e-26
transcription factor binding			4.2495e-22	4.18711e-18					1.38257e-14	1.66613e-11		1.72001e-19		3.31188e-11		2.69485e-36		2.16139e-17	2.1333e-07	1.89643e-15	2.80695e-43	4.5858e-26	2.42601e-34				4.49535e-07				1.80117e-18	0.00140929
translation factor activity, nucleic acid binding			6.96899e-08	7.6073e-09					1.07548e-10			9.53393e-16		9.969e-11		1.36079e-05		5.16926e-14	4.66962e-08		6.84939e-15	6.40626e-08	1.71769e-16				2.90183e-06				0.000123898	0.00562107
UDP-glycosyltransferase activity		8.68053e-08	6.57126e-17	0.000179482					6.50321e-12	6.55248e-10		1.65838e-17		4.43864e-09	1.93428e-05	3.35675e-51		1.1567e-13	1.13089e-06	8.65023e-08	1.88712e-32	7.28326e-19	2.6928e-26				0.000574416				3.13107e-18
peptidase activity		0.000414831	3.54071e-25	1.40994e-16					2.775e-16	9.32141e-18		8.7737e-21		7.36108e-12	6.61128e-06	5.82862e-45		1.10866e-18	7.54781e-08	3.08997e-22	5.59519e-52	3.53532e-31	3.0748e-38				3.89922e-07				1.11016e-24	0.00733331
cysteine-type peptidase activity		0.000612499	2.13217e-16						9.37446e-07	1.86816e-11		4.83699e-08		0.00346431	0.000905367	5.63818e-29		4.95198e-07	0.0482032	3.09731e-09	3.3137e-30	3.6743e-19	1.62479e-25								2.34414e-16
metallopeptidase activity		1.37602e-22	1.41976e-27		1.24272e-09		0.000425366	6.42993e-12	3.30345e-06	1.15556e-27	1.20673e-11	4.03736e-05	0.0203707		2.70731e-23	2.76614e-68		0.000471326		7.60337e-25	1.98882e-48	6.00928e-32	1.58682e-34	1.8469e-07	2.68992e-08			1.12545e-10			3.83545e-33		5.60178e-06	4.95082e-07	0.00136401	4.83014e-05
anion transmembrane transporter activity		7.93752e-16	1.03861e-21		0.00785916			3.32365e-05	1.32213e-07	4.4844e-20	1.07079e-07	4.67731e-08		0.0266337	2.16802e-12	7.65972e-46		1.88076e-06		6.19172e-16	1.37221e-39	3.58908e-25	3.74109e-29	0.00112749	0.0024456			1.70968e-05			5.84177e-26			0.00107137
primary active transmembrane transporter activity		1.44775e-05	5.71025e-13		0.00279133			7.88703e-05		3.14082e-11	0.00017446				1.38943e-05	2.47773e-15				4.14216e-09	1.90769e-20	9.57271e-15	8.79745e-18	0.00466902	0.00273005			0.00432628			2.79665e-13			0.0206944		0.0372937
tubulin binding			3.38215e-12						0.00611588	3.66861e-05		0.00211366				1.51972e-12		0.0100255		0.000120025	1.81687e-18	3.8075e-12	1.04394e-18								6.8973e-09
lipase activity		0.0184212	6.06736e-12	0.00919448					2.61885e-08	0.000302822		2.10251e-10		1.25403e-05		7.26799e-17		4.3495e-09	0.000240114	0.00742217	6.69021e-19	3.29924e-11	3.99196e-19				0.00354665				7.49228e-09
oxidoreductase activity, acting on CH-OH group of donors	2.19029e-09		4.81467e-06	1.80063e-26	6.96004e-06	0.00236976			8.29175e-16			3.33144e-28		4.18276e-23		1.55972e-12	6.58322e-10	1.57487e-25	1.39156e-16		2.15519e-18	3.61507e-09	1.46518e-20		0.049181	8.15593e-09	1.4444e-12		4.78367e-06	0.000722952	0.00107849	3.77316e-10	0.00711363		1.90509e-10	1.0404e-05	4.29898e-06	9.04117e-22	5.43e-15	6.36508e-06	0.0409582	0.0151589
oxidoreductase activity, acting on paired donors, with incorporation or reduction of molecular oxygen		5.29146e-07	2.61733e-16	6.93879e-08					3.7122e-13	1.95459e-08		3.05209e-19		2.79004e-12	0.0262697	7.65146e-35		6.59677e-16	2.95381e-09	1.62116e-06	2.61745e-31	8.00826e-18	5.08742e-25				1.83301e-05				3.95531e-16							0.000136497					7.88882e-07
transferase activity, transferring one-carbon groups			1.33209e-15	1.25684e-08					3.03758e-10	6.23428e-08		1.39197e-15		9.53979e-10		3.37953e-20		1.34584e-13	1.77238e-06	2.14786e-06	5.90592e-32	4.08039e-19	2.70508e-28				5.01316e-05				3.86483e-14							1.06722e-05
transferase activity, transferring acyl groups			7.33702e-16	7.38248e-17					2.60271e-15	5.41979e-06		7.2476e-24		6.68414e-16		2.1459e-26		2.70726e-20	4.64862e-11	3.54252e-05	3.85171e-32	5.22651e-18	4.01742e-28			0.000417701	1.56163e-08				2.08061e-13	9.13918e-05						7.6744e-11	3.11594e-05	0.00302032
transferase activity, transferring glycosyl groups		0.00196801	4.68333e-19	5.1635e-19					1.46638e-18	1.47242e-09		5.3577e-28		2.25221e-17	0.00112476	1.24978e-63		2.01275e-23	5.26015e-12	3.66248e-09	1.26227e-40	6.92051e-23	7.70417e-32			0.000213666	3.71371e-09				6.00925e-19	7.6345e-05						3.15448e-11	0.000116666	0.00109712			4.26121e-07
transferase activity, transferring phosphorus-containing groups		4.38397e-17	4.00597e-35		5.65862e-15		0.0269887	4.39408e-18	1.87141e-11	3.92515e-32	2.7385e-08	3.67859e-12		0.000750013	8.01861e-48	2.35967e-111		2.33706e-10	0.0287073	1.83979e-53	3.4618e-69	3.87184e-44	2.17529e-44	7.59439e-05	3.01578e-06			1.88537e-09			3.89811e-39		5.00448e-06	0.000152153		0.000301497							6.05667e-19		0.00309241	5.27759e-08	1.06486e-07
nucleotidyltransferase activity		0.0404729	1.90337e-11						8.45396e-08	0.000262954		1.36907e-08		0.00127182		4.53453e-16		2.19033e-07	0.0124174	0.00248287	5.29287e-18	5.61113e-11	7.49338e-17				0.0179406				2.41896e-08												0.0151767
hydrolase activity, acting on ester bonds			4.16335e-24	2.3995e-21					7.47327e-17	4.76557e-14		2.7665e-21		1.3053e-11	0.00012603	1.03371e-43		3.73596e-19	9.44288e-08	4.72328e-21	1.09589e-48	1.94021e-29	4.80274e-37				1.10579e-07				1.28598e-21	0.000425931						2.47881e-05					0.000322229					4.91043e-06
thiolester hydrolase activity		9.89375e-08	4.97109e-17					0.00164513	0.00323527	2.68679e-13	0.000276964	0.00371546			5.57307e-07	5.48441e-30		0.0186422		1.17804e-10	5.11741e-29	1.75271e-19	1.93629e-24	0.0465815	0.0234947			0.00148877			5.19726e-18			0.0340915									2.12323e-09			0.00937837
hydrolase activity, acting on glycosyl bonds		0.00306951	5.39749e-14	0.0207198					1.82949e-08	1.1709e-06		2.90036e-11		1.68181e-05		1.33612e-21		3.21772e-09	0.000433218	4.57136e-05	3.99551e-24	1.34044e-14	4.51974e-22				0.00560093				2.63224e-12												0.000407953
hydrolase activity, acting on carbon-nitrogen (but not peptide) bonds			1.06053e-11	1.63783e-08					3.5304e-11	0.000156984		1.93606e-17		7.58321e-11		6.07719e-15		7.97127e-15	2.87366e-08	0.0110317	3.25943e-24	9.08091e-14	9.03053e-23				7.15579e-06				2.45403e-10	0.0479845						1.1914e-06	0.0166966	0.0368932								0.00154677
hydrolase activity, acting on acid anhydrides		5.50254e-06	1.79874e-26		1.04202e-06			7.27937e-10	6.29612e-07	8.45919e-19	0.000391702	1.80115e-06			5.20454e-17	4.979e-44		6.56822e-06		5.75886e-33	5.26986e-47	5.9423e-31	6.33967e-35		0.0017307			0.000380836			9.59493e-24												4.58447e-07			0.00797044	0.00412499
hydrolase activity, acting on acid anhydrides, catalyzing transmembrane movement of substances		8.0675e-08	2.57321e-14		6.22205e-06		0.0101216	2.45272e-07		8.16879e-14	1.86745e-06		0.0129156		2.36192e-08	2.37571e-18				3.03895e-11	3.58528e-22	1.7015e-16	1.438e-18	3.51931e-05	1.09144e-05			5.71009e-05			1.91177e-15		0.00121732	0.000417568	0.00307383	0.000151323							2.96974e-08	0.000625971	0.0146935	1.34725e-05	1.94433e-06
ligase activity, forming carbon-nitrogen bonds		1.97746e-05	8.34304e-21	0.000266942					5.99462e-11	2.08508e-11	0.0336775	2.12995e-13		3.01197e-06	5.20424e-05	1.64146e-34		3.50494e-11	0.000434194	6.13541e-13	4.58475e-36	3.56347e-22	1.04375e-29				0.00119538				4.49801e-18												3.06929e-06
ATPase activity	0.00329515	3.54758e-19	2.95834e-31		2.10439e-27	5.68991e-06	1.60236e-08	1.43176e-27		8.93169e-34	6.80374e-14		1.78723e-08		1.27188e-40	2.7261e-70	0.0112884			3.1724e-43	3.67377e-53	1.66099e-38	2.26561e-36	4.77825e-12	6.1642e-16	2.04288e-05		8.44291e-16	4.13448e-05	0.0204428	6.6693e-36		6.94895e-16	6.6112e-10	3.4754e-08	1.03722e-16	0.00190531		0.0226686			3.70726e-05	1.12934e-20	2.54478e-10	1.51799e-09	2.82277e-16	8.26526e-19	7.52406e-07	0.000280119
purine nucleotide binding		3.56447e-15	2.35012e-37	0.0232093	7.38405e-25		0.0218028	1.53247e-23	1.37341e-10	1.78028e-33	2.69638e-08	2.67062e-11		0.00495036	6.25115e-63	3.02162e-110		1.16302e-09		2.05792e-71	1.74303e-73	4.74811e-47	4.069e-47	0.000135702	1.49437e-07			7.82752e-10			6.98153e-40		2.88386e-07	0.000242384		3.91055e-05							7.34964e-17	0.0242231	0.00856411	3.67866e-08	1.3137e-08
SH3 domain binding		3.54011e-07	5.91197e-16					0.0156248	0.000549984	6.28276e-12	0.00069278	0.000489184			8.65496e-06	1.12605e-28		0.00262256		2.4647e-09	2.83474e-27	7.84101e-18	2.91482e-23					0.0074728			2.11809e-16												1.24126e-08			0.032142
serine hydrolase activity	0.00812719		5.33203e-13	1.07595e-16					1.13985e-14	3.56442e-05		1.37293e-22		5.86502e-16		5.64196e-05	0.0129387	3.45236e-20	1.9948e-11	0.00825519	8.66652e-29	6.68612e-16	5.01517e-27			0.000722764	3.64761e-09				7.99875e-11	9.17559e-06						2.42498e-11	5.74999e-06	0.000331296								3.19575e-09
guanyl nucleotide binding	5.51846e-10		1.53336e-11	8.01257e-50	9.36715e-13	6.96344e-06			2.31249e-21			1.00551e-33		5.04211e-25	0.00017903		8.2953e-09	1.05622e-30	1.23049e-17		4.86406e-22	6.36327e-11	3.03114e-25			3.90763e-17	3.71149e-17		8.84911e-06	1.6465e-05	0.000905943	5.60235e-19	4.97292e-07		3.1394e-05	6.22965e-13	2.3312e-07	5.36829e-23	1.31643e-14	2.15647e-08	0.0147989			0.00115597	0.00102282		0.000122906	5.71378e-31
growth factor binding		0.000972513	2.4369e-14						4.02454e-05	1.503e-10	0.0315436	3.05555e-05			0.0187393	2.82586e-18		0.000115712		1.19836e-07	4.18685e-26	8.00568e-17	1.91479e-22								6.86401e-15												6.84695e-05
enzyme binding		3.79196e-07	7.47457e-27	0.00051566	0.00308804			5.06754e-07	1.64494e-10	3.85069e-19	0.000847449	1.27372e-11		0.000271724	3.27063e-17	3.57344e-60		5.08811e-10	0.0139473	2.55026e-29	9.6081e-50	1.2823e-31	4.63181e-36				0.00859908	0.000563767			3.31239e-25												2.43066e-09			0.0285487
kinase binding		0.000192598	5.29754e-19						1.10555e-08	1.66366e-12	0.0308325	3.74726e-10		0.000216669	0.000185383	2.3015e-31		7.10413e-09	0.00763129	9.86551e-12	1.20113e-34	1.03263e-21	1.2865e-28				0.0159037				3.52177e-18												3.48185e-06
protein domain specific binding		0.0054887	5.79714e-22	1.67913e-08					3.08222e-12	2.62744e-13		2.54213e-15		9.56482e-08	0.00126056	4.89419e-33		9.90126e-14	3.35129e-05	5.74415e-16	3.21856e-42	6.35673e-26	2.78803e-33				5.96503e-05				9.96859e-20							0.0113136					0.000217616
cytokine binding			1.35283e-11	3.90718e-10					2.55394e-12	0.000681674		1.62953e-19		8.93241e-13		1.56056e-25		2.46511e-16	7.06316e-09	0.0271038	6.17135e-24	3.69718e-13	1.20743e-22				1.02948e-06				2.4329e-10	0.0144279						2.54881e-08	0.000515041	0.010012			0.0400771					0.000125254
passive transmembrane transporter activity		1.85599e-06	1.81855e-24	1.21286e-06				0.0105736	2.14992e-11	4.12861e-18	0.00837391	1.86371e-14		3.28101e-07	7.52197e-09	5.82669e-46		2.04589e-12	0.000133688	2.6843e-21	1.56313e-48	5.13541e-30	5.21409e-35				0.000804911	0.0170703			6.46861e-25												1.79279e-07
active transmembrane transporter activity		1.56164e-17	1.53995e-27		8.85693e-07			1.08444e-09	1.93715e-11	2.14812e-25	7.76535e-09	8.96484e-12		0.00247012	8.84873e-23	6.74672e-68		7.7244e-10	0.0166284	6.09095e-28	3.61628e-52	8.881e-33	3.10568e-35	0.000107678	1.68381e-05			6.68649e-07			4.29751e-32		0.00210832	0.000537345									5.48072e-17	0.00246278	0.0225675	7.10735e-07	4.21816e-07
ligand-gated channel activity		6.25652e-17	7.29613e-21					0.00524046	3.3594e-06	8.58484e-16	6.79987e-05	1.01084e-07		0.00390137	2.56266e-11	8.33235e-51		4.72244e-06		5.47893e-13	5.87363e-36	6.88271e-23	3.79417e-27	0.0491125				0.000611343			9.20726e-23			0.0261679									1.40755e-14			0.00964003
inorganic cation transmembrane transporter activity			5.56469e-07	1.14765e-15					8.2097e-18			2.71326e-22		1.70422e-13		1.49754e-08		1.63141e-19	2.37108e-10		9.19792e-15	6.35359e-07	6.9117e-13			8.83104e-06	1.57633e-09				5.04753e-05	1.06638e-06						2.42604e-08	0.00281912	9.16568e-05								3.16315e-07
substrate-specific transmembrane transporter activity		7.2118e-06	1.42528e-23	2.04794e-20					1.69396e-17	8.15735e-17		1.27422e-21		1.40951e-11	4.57136e-10	2.7589e-54		4.84235e-19	7.22983e-08	7.18171e-24	2.52199e-49	4.23899e-29	1.69497e-33				3.1587e-07				9.23083e-24	0.00124533						9.70408e-05					9.30108e-07					0.000109936
polysaccharide binding			1.01328e-10	1.37533e-07					5.77606e-10	0.00272871		3.46027e-13		5.49779e-08		2.3982e-08		6.21124e-12	1.5494e-05	0.0391331	5.15782e-20	1.28118e-11	1.34166e-19				3.3455e-05				3.03034e-07							0.000321786										0.00643872
peptidase inhibitor activity	8.66108e-06		0.00925497	9.91195e-20	1.76047e-05	0.00173897			2.2631e-14			1.90201e-19		5.05735e-14			1.32997e-05	5.80058e-18	5.17875e-11		0.000103004		6.60295e-08			3.36168e-08	6.19687e-11		0.00136885	0.00133356		1.25842e-09	0.00108274		0.000859575	1.01311e-05	0.000585531	1.24342e-12	8.45611e-09	0.000126712	0.0373857			0.00207739			0.0169896	1.80843e-13
GTPase regulator activity	0.000249782	3.02277e-27	2.20712e-38	0.0171311	1.30726e-39	3.02139e-07	5.27693e-11	1.05398e-36	0.0358138	8.13955e-44	1.518e-18		1.11674e-09		2.2394e-59	5.48244e-98	0.00110324			1.38776e-58	6.1445e-67	2.67447e-47	1.03135e-43	1.69206e-15	1.94296e-22	2.26465e-06		1.57266e-20	2.8123e-07	0.00455323	1.37718e-45		2.86632e-21	6.34299e-13	1.52483e-11	6.19833e-22	0.000289898		0.00482417			4.82702e-07	5.24058e-28	3.5801e-15	5.58717e-13	1.26348e-22	1.56926e-26	2.69262e-09	2.32146e-05
protein complex binding		0.00644145	3.22697e-20					0.0243831	4.73743e-07	1.3382e-13	0.0399445	5.89871e-08		0.0114809	9.53018e-05	8.82944e-30		3.12552e-07		2.22804e-14	3.69971e-37	3.18425e-24	1.83686e-30								4.57036e-19												3.4506e-05
ribonucleotide binding		1.1158e-14	4.40488e-37		8.04768e-25		0.0203714	1.44759e-23	3.85237e-10	4.29356e-33	3.27731e-08	1.16211e-10		0.0109794	6.67722e-61	7.51106e-107		3.75868e-09		2.97803e-70	1.57633e-72	1.21106e-46	7.87081e-47	0.000136781	1.07068e-07			8.11676e-10			2.64734e-39		2.60618e-07	0.000241168		2.56351e-05							1.75404e-16	0.0217467	0.0087171	3.82847e-08	1.25573e-08
phosphoric ester hydrolase activity			1.08842e-20	4.6966e-10					1.76619e-13	1.53887e-12		3.93414e-17		5.95459e-09	0.00643738	1.24351e-35		2.26611e-15	3.91042e-06	5.52032e-14	8.92893e-42	1.89203e-25	3.43426e-33				1.19028e-05				1.00092e-19							0.00162008					0.000316229					0.0383079
identical protein binding	0.0129654		1.21251e-19	3.67568e-39					9.79233e-20	1.39092e-07		9.64722e-28		6.95091e-18		2.64668e-28	0.00908811	3.73589e-25	3.215e-12	8.22775e-11	1.56987e-40	4.50432e-23	6.88931e-33			4.22493e-08	1.72025e-11				6.85811e-15	2.04119e-10						1.12002e-12	7.61473e-06	0.000290698								1.58176e-17
cation binding		1.36933e-10	7.88969e-33	1.12062e-26	3.04475e-08			2.27339e-11	2.35162e-17	6.99213e-27	9.80747e-05	3.26521e-21		3.60162e-10	2.26814e-46	8.5031e-103		2.28933e-18	1.98254e-06	3.48564e-60	6.2956e-69	1.55099e-41	1.1431e-43		0.0250671		4.73542e-06	4.44257e-05			1.81964e-34							0.00360377					1.90636e-12			0.00475452	0.0251743	0.0232774
ATPase activity, coupled to movement of substances		4.73523e-09	3.60067e-15		4.18334e-07		0.00180416	1.61018e-08		1.99842e-15	1.64203e-07		0.00252666		8.68345e-10	1.4382e-20				1.42553e-12	7.29565e-24	8.80693e-18	1.1064e-19	4.00262e-06	8.9188e-07			5.36066e-06			4.15657e-17		0.000146063	6.34773e-05	0.000439495	1.6508e-05						0.023236	1.7034e-09	7.46624e-05	0.00242794	1.17078e-06	1.3052e-07
sequence-specific DNA binding	1.39755e-08		5.78949e-18	1.25114e-68	4.56206e-10	0.00446928			6.68328e-25	1.18919e-05		1.12591e-39		5.73345e-29		1.64677e-26	3.81685e-09	9.48634e-36	2.08544e-19	1.51084e-06	4.2026e-43	3.05658e-23	2.11351e-35			7.09712e-18	3.74775e-17		0.000394672	0.00220405	5.82944e-14	1.32525e-19	0.00776075		2.28035e-05	8.37412e-08	4.2057e-05	1.18659e-25	4.24822e-15	1.00154e-07				0.00410785			0.00772769	9.993e-38
structure-specific DNA binding			1.30495e-11	2.63562e-09					2.08303e-11	0.00151207		4.22502e-16		2.69836e-10		1.06451e-16		2.20538e-14	2.31126e-07	0.0190721	1.64285e-22	6.30052e-13	5.86172e-22				3.82664e-06				1.31305e-08	0.0256027						3.13797e-06	0.0178641									0.000473708
DNA regulatory region binding			2.81954e-14	6.55329e-06					1.58171e-09	1.96289e-06		1.18852e-14		5.86635e-09		1.84732e-25		2.74e-12	2.64807e-06	7.44273e-05	2.56182e-27	4.41146e-16	1.01511e-24				0.000220323				5.96175e-13							0.000162686					0.00217487
metal ion transmembrane transporter activity		1.18963e-09	4.33973e-18					0.0159022	6.90543e-08	2.16165e-14	4.03764e-05	1.24362e-09		0.00682581	3.54098e-07	1.85822e-35		2.13632e-07	0.0352952	3.21416e-11	9.27381e-34	6.55552e-21	3.15692e-26					0.00343246			4.97972e-21												1.00011e-10			0.0192302	0.0428419
protein heterodimerization activity			6.47464e-17	7.73239e-10					5.35654e-13	3.39064e-07		6.04148e-18		3.51306e-10		3.32212e-27		9.68592e-16	2.3256e-07	6.31326e-07	1.02227e-31	1.237e-18	9.07143e-28				4.39713e-06				5.83555e-14	0.0431138						1.44317e-05					0.00927733					0.0038526
protein dimerization activity			1.54639e-20	2.13489e-28					2.08706e-18	2.40741e-09		2.81555e-25		1.65167e-15		2.89879e-38		1.43707e-22	1.37153e-10	1.39999e-12	1.51185e-41	6.27199e-24	1.3769e-32			1.7834e-05	1.02439e-09				8.87397e-17	4.0622e-07						4.59479e-10	0.00083322	0.00269646			0.0198854					2.11255e-11
coenzyme binding			1.12359e-15	6.8142e-13					3.16157e-15	2.44022e-08		7.35695e-23		4.97867e-14		1.3772e-31		2.23339e-19	3.55647e-10	3.82223e-06	5.38911e-34	3.03619e-19	2.8614e-28			0.0165754	1.77722e-07				6.29659e-16	0.00204096						1.10682e-08	0.00225837	0.00621488			0.00314045					3.56502e-05
GTPase binding		2.90891e-12	1.88066e-20		3.78087e-09	0.0226464	0.000113482	1.01136e-10		2.15645e-18	1.39452e-09		0.000429573		1.0229e-14	1.46232e-35				4.48398e-17	4.84996e-31	1.22957e-22	2.53225e-25	2.5287e-07	1.5248e-09			9.12732e-09	0.0272359		1.23366e-21		3.51432e-06	1.29602e-06	2.64163e-05	8.21909e-06						0.00500395	5.48417e-14	1.14036e-07	3.97868e-05	7.81826e-09	6.02469e-10		0.0302699
unfolded protein binding	0.000649507		7.51287e-07	1.75385e-15					4.49154e-14			6.66354e-22		6.66218e-16		2.72389e-06	0.000310749	4.1291e-19	3.67367e-12		7.96981e-13	3.93097e-06	2.65065e-15			1.09115e-05	1.30654e-09				0.0120231	2.12506e-06			0.0390486	0.0319233	0.0166053	4.13558e-12	1.85019e-07	0.000118453								2.04399e-09
endopeptidase regulator activity	3.6213e-06		0.00798849	2.55781e-20	8.16077e-06	0.00100219			1.19574e-14			5.10228e-20		1.3998e-14			5.84044e-06	1.76175e-18	1.89081e-11		9.29706e-05		3.81917e-08			1.83913e-08	2.67521e-11		0.000666294	0.000754733		6.55076e-10	0.000571166		0.000315741	4.54012e-06	0.000295778	2.87446e-13	2.60115e-09	7.33783e-05	0.0261241			0.000799461			0.00714541	5.01925e-14
[truncated: 41 more columns]

## Sheet: NumOfPolarAAsWithNegtiveCharge
Class	magnesium ion binding	peptide receptor activity	G-protein-coupled receptor binding	purine nucleoside binding	DNA binding	transcription coactivator activity	transcription corepressor activity	RNA binding	motor activity	GTPase activity	carboxylesterase activity	helicase activity	nuclease activity	protein tyrosine kinase activity	receptor activity	olfactory receptor activity	receptor signaling protein activity	guanyl-nucleotide exchange factor activity	Ras GTPase activator activity	receptor binding	cytokine activity	cytokine receptor binding	hormone activity	potassium channel activity	iron ion binding	calcium ion binding	calmodulin binding	sugar binding	phospholipid binding	protein C-terminus binding	growth factor activity	cytoskeletal protein binding	transcription factor binding	translation factor activity, nucleic acid binding	UDP-glycosyltransferase activity	peptidase activity	cysteine-type peptidase activity	metallopeptidase activity	anion transmembrane transporter activity	primary active transmembrane transporter activity	tubulin binding	lipase activity	oxidoreductase activity, acting on CH-OH group of donors	oxidoreductase activity, acting on paired donors, with incorporation or reduction of molecular oxygen	transferase activity, transferring one-carbon groups	transferase activity, transferring acyl groups	transferase activity, transferring glycosyl groups	transferase activity, transferring phosphorus-containing groups	nucleotidyltransferase activity
magnesium ion binding
peptide receptor activity	7.16643e-37
G-protein-coupled receptor binding	6.75454e-07	2.74864e-10
purine nucleoside binding		6.58882e-59	1.07389e-13
DNA binding	0.0188271	1.96111e-49	0.000138059	7.29261e-28
transcription coactivator activity		7.60631e-35	1.33082e-05
transcription corepressor activity		4.08365e-33	2.96094e-06
RNA binding		3.45569e-44	4.62115e-06	0.014199
motor activity	8.83086e-09	7.13112e-37	1.57996e-18	3.82929e-14	6.00917e-25	1.02019e-06	0.00011208	4.63377e-14
GTPase activity	0.0115728	2.03375e-42	2.69576e-15	8.74532e-06	6.96925e-21			7.58397e-08
carboxylesterase activity	7.5214e-09	5.75136e-24		2.04122e-13		0.00325551	3.23772e-05	0.0373017	1.04467e-21	6.69785e-21
helicase activity		9.26081e-37	7.34959e-13	0.00141421	2.30483e-14			1.32911e-05			1.69021e-18
nuclease activity		1.88131e-31	0.00127304						1.58792e-11	3.3448e-05	0.00263413	0.000389478
protein tyrosine kinase activity		1.76212e-33	0.00105728						1.91393e-13	6.06066e-08	7.17571e-05	1.52743e-06
receptor activity	8.18837e-48	0.00469138	0.00342572	8.68329e-269	8.44098e-188	1.784e-45	1.78549e-38	5.1528e-108	2.12399e-62	5.53433e-82	6.75185e-10	7.91757e-58	4.15077e-36	2.66073e-35
olfactory receptor activity	2.87181e-75	9.11063e-20	7.74737e-44	1.19412e-216	7.26332e-221	9.45793e-89	1.334e-69	1.89252e-161	6.42606e-68	1.58678e-90	1.73713e-50	1.20855e-68	1.9386e-71	2.38329e-66	1.47091e-83
receptor signaling protein activity		1.59229e-34	0.000393593						6.37227e-13	3.82623e-07	0.000448978	8.83923e-06			3.22549e-38	4.02032e-73
guanyl-nucleotide exchange factor activity		6.74812e-36	6.7153e-12	0.00786952	7.68307e-14			0.000135458	0.0480439		4.90616e-19		0.00102622	1.29388e-06	9.20458e-59	1.09039e-68	1.60345e-05
Ras GTPase activator activity		6.83279e-29	1.75711e-06		0.00100323				0.000630671		3.39864e-10				2.35989e-34	1.7917e-51
receptor binding	0.000123719	1.19155e-39		3.69351e-27			0.00202649	0.0196498	1.12316e-25	1.92598e-22		4.56728e-16			1.50521e-88	1.57219e-165		1.40279e-15	2.78694e-05
cytokine activity	9.5066e-20	2.38534e-16		1.65458e-39	1.42789e-15	3.20745e-13	1.37131e-14	3.38825e-16	7.91148e-33	1.85016e-35		4.21994e-29	5.32916e-12	4.29812e-14	0.000291665	2.35854e-64	7.55341e-14	3.17649e-29	2.14308e-17	3.36487e-08
cytokine receptor binding	2.76003e-12	1.66451e-18		8.40361e-25	1.04195e-06	7.68131e-08	1.57256e-09	1.33836e-08	6.27151e-28	4.19984e-27		2.78796e-22	1.81559e-06	2.24683e-07	7.62496e-09	5.02471e-64	2.46572e-07	2.70523e-22	4.62493e-12	0.0262154
hormone activity	1.79719e-05	5.39629e-15		4.20833e-10		0.00560971	0.000141774	0.0145546	1.08964e-17	2.72935e-15		4.58192e-13	0.024305	0.011219	5.35659e-06	1.48933e-40	0.0147243	2.88843e-13	5.27866e-07
potassium channel activity	0.000968319	1.24517e-26		2.2616e-07			0.0232267		2.09961e-17	7.73321e-14		6.17119e-12			1.01403e-16	3.9837e-62		2.12049e-11	0.00010281		0.0110301
iron ion binding	0.00413204	3.09777e-35		2.35948e-08					1.29195e-20	2.69916e-17		7.4995e-14			2.76142e-34	3.34269e-87		1.522e-13	2.89004e-05		7.5321e-08	0.0336239
calcium ion binding	0.00215387	9.92353e-55	5.8027e-21	5.31852e-14	9.39651e-50	0.00052253		2.03142e-18			1.23334e-21		4.68413e-07	4.46727e-08	6.7707e-187	4.60435e-164	2.25739e-08			5.83865e-46	8.32814e-47	2.34125e-35	1.09761e-17	2.76895e-16	2.9057e-21
calmodulin binding		1.29413e-34	5.05208e-11		4.05192e-10			0.00126686			2.17041e-13		0.0279681	0.001492	1.70993e-49	4.18989e-67	0.00254745			7.18463e-12	1.81606e-23	1.56414e-17	7.13262e-10	1.41277e-08	1.80338e-09
sugar binding	6.86671e-05	9.59757e-33		2.16769e-11			0.00546446		1.58015e-21	1.10291e-18		2.38473e-15			3.64711e-27	1.79109e-84		2.35093e-15	2.21657e-06		0.000114933					2.50426e-23	8.48412e-11
phospholipid binding		5.64122e-37	1.8959e-11		1.97954e-11			0.00140222			4.18098e-13		0.0242499	0.00164973	2.93629e-61	1.63486e-82	0.00339606			2.02019e-13	3.41221e-25	6.38002e-19	2.11929e-10	1.46538e-08	1.66033e-09			3.62661e-11
protein C-terminus binding		3.31422e-32	4.97617e-08		5.83171e-05						2.02376e-08				4.48637e-42	6.20498e-66				9.2226e-07	1.0204e-17	1.47677e-12	7.01265e-07	9.59073e-05	9.00835e-05			3.63872e-06
growth factor activity	3.3555e-09	5.92605e-24		2.22162e-17	0.0169789	0.000209175	2.70479e-06	0.000370774	9.57488e-23	1.28295e-21		5.22763e-18	0.00102973	5.73968e-05	1.95413e-12	3.40576e-66	0.000105831	3.29154e-18	2.61567e-09							9.36916e-27	1.23097e-13		4.5012e-14	6.25403e-09
cytoskeletal protein binding	1.47299e-06	9.60071e-52	7.90075e-23	1.77772e-21	1.49194e-52	8.29433e-07	0.00527945	1.38264e-22			5.87953e-23		2.4478e-10	1.74101e-11	2.43732e-164	1.36782e-148	1.23748e-11			3.35025e-48	1.46192e-46	1.85496e-36	4.57232e-19	9.58493e-19	7.46251e-25			4.82675e-26			8.82242e-28
transcription factor binding		1.43928e-45	2.12339e-08		0.000427138				1.1189e-10	0.000738537	1.15371e-05	0.0103989			4.96523e-103	7.63816e-147				4.17182e-07	1.72335e-21	4.58767e-13	4.47758e-05	0.0169395		1.94101e-09		0.00112793			5.53488e-08	5.90318e-14
translation factor activity, nucleic acid binding	0.00209834	1.42435e-30	2.04403e-12	3.59854e-05	3.88118e-13	0.00530033		1.15663e-06			3.36661e-16		2.87836e-05	6.01158e-07	5.74744e-42	5.69686e-51	1.37887e-06			1.84336e-14	3.93301e-24	2.39157e-19	2.78093e-12	1.7023e-11	7.62982e-13			7.29001e-14			4.61115e-16		0.000152816
UDP-glycosyltransferase activity	1.14354e-09	6.88681e-28		2.92227e-16		0.000441908	5.55264e-06	0.00512447	2.12795e-24	2.34173e-23		3.99677e-20	0.0011638	2.80076e-05	1.14343e-12	5.91255e-61	0.000101809	1.42705e-20	1.07866e-10							1.96489e-25	7.31396e-15		5.06385e-15	1.99166e-09		2.18876e-27	4.92553e-07	1.76008e-17
peptidase activity	8.00872e-06	8.10064e-44	0.0477024	2.70052e-24		0.0319379	0.000739301		1.97992e-29	1.43373e-26		1.28649e-19			1.01826e-74	1.06551e-152		1.82708e-19	2.82714e-07		5.38602e-10	0.00582262				1.44937e-44	4.64831e-14		1.40955e-15	5.99676e-08		1.5697e-48	6.65822e-07	4.34943e-17
cysteine-type peptidase activity		1.19464e-35	1.01324e-08		3.41754e-05				0.000146934		1.00277e-10				6.00958e-47	2.29977e-69				1.91196e-07	3.38607e-21	1.24515e-14	1.29126e-07	9.73748e-06	3.50758e-05			1.64337e-07			5.56148e-11	0.0199375			4.5452e-12	6.98046e-09
metallopeptidase activity		3.76157e-36	0.0295709	1.56358e-05					8.83586e-21	1.33566e-16		1.80413e-13			2.28784e-36	3.42893e-81		2.44516e-14	3.98017e-05		5.98745e-11	0.000318138				8.13938e-19	8.29979e-09		3.97446e-09	0.000518562	0.0356753	1.02672e-21		2.80368e-12			0.000270405
anion transmembrane transporter activity	2.17081e-20	1.16678e-18		1.28968e-34	2.01209e-13	1.07891e-12	5.80955e-14	7.83995e-14	3.01637e-30	2.19381e-32		1.40543e-27	1.71985e-11	4.09795e-15	0.00277899	2.67296e-62	1.90963e-14	2.00567e-27	1.28616e-16	4.45402e-07				0.00484335	1.39687e-08	4.83414e-40	1.21226e-22	3.2153e-05	5.73043e-23	9.33525e-17		6.82313e-40	3.0102e-19	1.43686e-23		1.2847e-09	2.39519e-21	1.57697e-12
primary active transmembrane transporter activity	5.41215e-08	3.40345e-21		5.7761e-13		0.00232872	2.75719e-05	0.0148616	4.01796e-20	1.74474e-18		2.67414e-16	0.00588744	0.000220388	4.89887e-09	1.13933e-50	0.000820638	2.30119e-16	9.74265e-09							5.79569e-21	3.73637e-12		7.68389e-12	6.21373e-08		2.68636e-22	7.45257e-06	4.51412e-15			1.42758e-09
tubulin binding		2.08385e-29	1.20264e-10	0.0179654	4.30451e-09			0.000568018			1.35379e-11		0.00307819	0.000382452	1.02977e-37	6.7565e-53	0.000860136			1.7082e-10	1.59126e-19	1.96507e-15	2.21957e-09	2.57599e-08	8.61427e-09			6.87334e-10			9.3139e-12		0.0367241		6.41623e-13	2.33959e-12		7.62255e-08	8.6442e-19	7.10742e-11
lipase activity	0.000126442	7.66754e-21		4.18271e-08			0.00296309		3.36273e-17	8.20411e-14		3.85939e-12			8.10176e-10	4.29528e-48		6.67291e-12	1.44738e-05							7.45691e-16	7.71569e-09		4.25425e-09	1.49458e-05		9.98259e-18	0.00197338	1.03241e-11			1.06669e-06				9.9833e-09
oxidoreductase activity, acting on CH-OH group of donors	2.88676e-09	1.91936e-26		6.06342e-15		0.00320404	1.025e-05	0.0278634	1.26909e-23	3.43655e-23		3.95021e-20	0.00115717	3.49893e-05	2.12238e-12	1.27786e-55	0.0002226	3.42943e-21	2.04647e-11							2.74223e-24	2.16954e-14		2.74778e-14	4.5463e-09		1.75419e-25	4.50488e-06	1.6917e-17			4.86024e-11		0.0194257		3.45826e-12
oxidoreductase activity, acting on paired donors, with incorporation or reduction of molecular oxygen	0.0474278	1.63544e-31		0.000113719					1.76338e-16	1.96238e-13		2.79062e-11			6.60549e-25	1.83326e-66		7.0497e-11	0.00031957		3.78078e-07	0.0487653				2.04705e-14	2.11776e-07		6.55654e-07	0.00266066		2.0258e-17		8.15877e-11			0.00135215		2.46453e-08		4.09747e-07
transferase activity, transferring one-carbon groups		1.83241e-37	4.44496e-07		0.00907659				2.40481e-08		4.33692e-08				4.93437e-50	6.91126e-80				6.99395e-05	3.82759e-19	3.83804e-12	6.06589e-06	0.00211126	0.00366759	0.00856994		7.28305e-05			1.30451e-08	2.0564e-06		0.0077917	4.45508e-09	4.20768e-06		0.0342224	1.62161e-18	1.71866e-07		0.000197173	7.08257e-09
transferase activity, transferring acyl groups	1.82129e-12	1.69787e-24		1.10149e-26	1.54097e-06	1.96203e-07	6.19367e-09	3.28746e-08	1.68536e-27	1.59225e-26		8.17808e-22	6.43867e-06	1.54978e-07	3.343e-13	2.51624e-80	2.43697e-07	1.88557e-21	2.36484e-11						0.0247594	1.85276e-36	1.9361e-17		4.40797e-18	6.76564e-12		4.8489e-38	5.65713e-13	3.32986e-19		0.0106179	2.37025e-14	0.000140012			4.77448e-15			0.030755	8.20422e-12
transferase activity, transferring glycosyl groups	1.19454e-15	1.26845e-30		4.50008e-36	6.12559e-08	4.41202e-09	9.31291e-11	3.88206e-10	8.35224e-35	5.01258e-36		8.90109e-29	1.29885e-07	4.07016e-09	2.35046e-19	1.7877e-94	6.70979e-09	2.00032e-29	4.91815e-15						0.0183384	2.77389e-48	5.19752e-22		5.25218e-24	4.00024e-15		1.06835e-49	2.12346e-16	1.3944e-23		0.00405839	8.74217e-19	4.13771e-05			2.16977e-18			0.0210481	2.07389e-15
transferase activity, transferring phosphorus-containing groups		6.1562e-55	1.18885e-11		1.29003e-15				2.97009e-15	4.9226e-07	2.1713e-12	0.000135179			5.18706e-187	2.0798e-184		0.000502276		2.9983e-18	2.86961e-35	1.08107e-21	7.72905e-09	3.85228e-06	7.42952e-07	6.42917e-14	0.0405481	1.58874e-09	0.0289109		2.2124e-15	7.3384e-21		7.32138e-06	1.32621e-14	6.08838e-18		0.000222392	1.22597e-31	6.94279e-12	0.00411074	6.51496e-07	8.19915e-14	0.00063659		4.44452e-23	7.93475e-31
nucleotidyltransferase activity		1.03452e-32	8.86103e-07		0.0365879				0.000241167		6.49806e-07				9.09106e-37	2.77376e-62				0.00053463	4.38254e-16	2.75257e-10	3.16705e-05	0.0040261	0.013237			0.000437819			1.81006e-07	0.0204395			8.14846e-08	8.28295e-05			3.60454e-16	1.72938e-06		0.000374367	4.42882e-07			3.09238e-10	1.4995e-12
hydrolase activity, acting on ester bonds		1.60562e-48	2.6522e-06	3.60671e-05					7.31301e-21	7.56861e-14	0.000352253	5.5698e-10			1.34603e-119	1.51767e-165		3.16961e-09		0.00585339	1.39801e-20	1.02822e-10	0.00204921			5.52191e-26	2.19091e-06		3.7411e-07	0.0319839	4.28563e-06	2.3373e-32		3.62646e-10	3.21259e-05	0.00919297			1.41632e-18	0.000337457	6.85449e-07		0.000162738			1.06928e-10	6.88792e-14	0.0263098
thiolester hydrolase activity		3.36397e-29	0.000116297						1.34826e-06		6.34559e-05				4.16609e-28	1.16441e-52					1.25689e-12	1.89827e-07	0.00298484			0.041383					3.98293e-05	0.000134571		0.00486469	1.2038e-05				6.73525e-14	0.000231595		0.0147336	9.13354e-05			2.033e-07	2.75256e-09
hydrolase activity, acting on glycosyl bonds	3.77596e-10	1.76186e-26		3.9129e-16		0.000701031	4.57928e-06	0.00472669	1.49254e-23	3.37722e-23		4.50696e-20	0.000263303	4.73646e-06	3.06423e-11	2.27832e-57	3.1439e-05	1.28834e-20	2.32642e-11							6.6894e-25	1.41319e-14		1.16818e-14	2.79963e-09		2.04781e-26	6.04259e-07	1.23983e-17			8.51834e-12	0.0168014			6.86019e-13				3.59021e-09			5.9881e-15	4.61976e-08
hydrolase activity, acting on carbon-nitrogen (but not peptide) bonds	0.0367041	4.03889e-27		8.52143e-05					5.00799e-17	8.6457e-14		1.34882e-11			1.41327e-19	2.43031e-57		4.7459e-12	7.50563e-05		3.91243e-05					2.41355e-14	8.77674e-08		1.57249e-07	0.000904538		1.74713e-16		1.17903e-10			0.000477696		3.08405e-06		3.34527e-07				0.0222311			0.000537743
hydrolase activity, acting on acid anhydrides		3.11578e-54	7.54867e-18	2.11113e-06	3.45649e-40			3.00717e-11	0.000261171		1.29434e-18		0.000873746	5.20265e-05	2.72322e-194	3.72871e-171	6.39726e-05			8.40634e-38	3.94314e-43	4.63752e-31	6.97758e-15	5.955e-13	1.43919e-16			6.20542e-19			7.38412e-23	0.00281664	0.000579844		3.1413e-22	3.91438e-37		3.71687e-14	7.79411e-37	1.01918e-17		6.64478e-13	7.26461e-21	7.42633e-11		5.60657e-32	8.61836e-44	5.24242e-07
hydrolase activity, acting on acid anhydrides, catalyzing transmembrane movement of substances	4.29835e-06	2.96905e-22		9.60707e-10			0.00112685		5.22764e-18	5.70748e-16		3.40041e-14		0.00788249	2.16088e-10	1.99952e-47	0.0288168	2.64233e-14	3.23913e-07							1.55576e-17	2.86722e-10		7.78487e-10	3.22403e-06		4.79108e-19	0.000896844	2.20175e-13			1.11785e-07				2.91636e-09				1.40826e-05			6.37611e-09	8.00608e-05
ligase activity, forming carbon-nitrogen bonds		1.66821e-44	6.68417e-09		3.5036e-05				6.25576e-11	0.000419516	2.63447e-10	0.00590588			1.13359e-76	1.08165e-107		0.0111731		4.45317e-08	1.26734e-25	6.71505e-16	5.07155e-07	0.000123053	0.000169716	6.58853e-06		1.77118e-06			1.20715e-11	5.15211e-10		0.000293758	1.17821e-11	4.40985e-09		0.008904	8.54499e-25	1.20658e-09		1.03333e-05	2.60251e-11	0.00948603		1.74986e-16	1.02924e-20
ATPase activity		1.43688e-43	3.19148e-10		3.06825e-08				5.70743e-07		1.16294e-09				1.62134e-84	3.35275e-114				5.0447e-11	4.03738e-25	9.21046e-17	7.44771e-08	2.03377e-05	2.94113e-05	0.0201571		1.96005e-07			1.18313e-11	1.64502e-06			1.82147e-11	1.43563e-11		0.000642945	5.89528e-23	3.44526e-09		3.29973e-06	1.81575e-10	0.00406912		1.00863e-16	7.28017e-22
purine nucleotide binding		9.15356e-60	6.19864e-15		3.23845e-38			0.000102175	8.01914e-13	0.000377343	4.9032e-15	0.0227266			7.7516e-304	3.70532e-224				7.58878e-34	1.78143e-42	2.39752e-27	2.17404e-11	9.83473e-09	1.55477e-10	1.84255e-11		1.4223e-13			2.27844e-19	3.81426e-19		0.000317137	3.5385e-18	5.02978e-30		1.56533e-07	1.17015e-36	1.83078e-14		2.69282e-09	7.33296e-17	3.83949e-06		2.98581e-29	4.1813e-40
SH3 domain binding		1.05532e-27	0.000236968						8.02348e-06		4.99026e-05				2.67599e-28	4.81254e-53					3.23922e-12	2.10687e-07	0.00206113					0.0375451			4.58572e-05	0.000936777		0.0378917	1.04844e-05	0.0316878			1.21326e-12	0.000250499		0.0202476	2.03621e-05			4.74318e-07	3.43891e-09
serine hydrolase activity	1.13007e-20	5.35409e-22		6.20551e-39	1.95435e-14	2.21236e-13	1.10608e-14	2.11056e-15	2.73023e-34	8.31359e-37		1.46748e-30	2.90307e-12	8.24381e-15	9.35274e-06	6.36637e-72	1.84455e-14	1.39835e-30	3.25934e-18	2.54692e-07				0.0108275	3.7873e-08	4.0536e-46	2.78739e-24	0.000132213	8.64615e-26	3.34806e-18		1.75765e-46	4.23659e-21	1.44486e-25		1.33097e-09	1.33829e-22	2.46384e-11			1.29368e-20			9.20834e-08	5.90263e-20			5.37783e-35	3.6398e-17
guanyl nucleotide binding		1.92453e-49	1.41e-15	0.00146763	8.79214e-25			3.08737e-07	8.98028e-05		2.50209e-19		0.00369778	3.61192e-05	4.69798e-124	1.99848e-130	9.80102e-05			4.13717e-26	5.44587e-39	2.80172e-28	2.47009e-14	2.51601e-12	9.53097e-16			9.65872e-18			1.50729e-21	0.0113128	0.0241146		4.81908e-22	5.25228e-29		2.80673e-14	1.47949e-34	1.30528e-17		1.66738e-12	1.14505e-21	3.08412e-11		3.32765e-28	1.17958e-38	0.000119157
growth factor binding		2.2699e-26		0.00219426					4.94804e-15	1.07664e-11		5.24181e-10			7.75343e-19	5.32792e-52		2.77413e-10	0.000674062		1.71621e-05					4.81285e-12	2.99318e-06		2.54414e-06	0.00491956		2.22707e-14		1.12727e-09			0.00299842		1.53908e-06		1.87294e-06							0.0103633
enzyme binding		2.50895e-50	2.87472e-13		8.84806e-19			0.00128837	1.94314e-06		7.77246e-12				9.25824e-146	1.12379e-159				1.46163e-20	2.79186e-32	8.61301e-22	4.81972e-10	2.47559e-07	1.36747e-08	0.0170028		1.01185e-10			3.37258e-15	5.24968e-07			2.3569e-14	3.24268e-20		1.7558e-06	9.50498e-28	1.50445e-11		5.79037e-08	3.68742e-13	3.53643e-05		3.35513e-22	2.14638e-29
kinase binding		3.58705e-38	8.07067e-08		0.00136204				1.34791e-06		1.34523e-07				6.81231e-55	2.8495e-87				7.82141e-06	1.53686e-19	1.37399e-12	6.02423e-06	0.00131106	0.00339222	0.0363109		7.65928e-05			1.04629e-08	4.24924e-05		0.0424403	1.03094e-08	1.08859e-06		0.0434137	1.19228e-18	4.00765e-07		0.000129442	3.61582e-08			2.16633e-12	1.85735e-15
protein domain specific binding		9.92628e-43	5.25551e-11		2.80033e-11				0.000250628		1.76773e-09				1.30542e-94	4.63883e-125				1.34654e-13	3.31254e-25	2.0552e-17	4.25204e-08	7.44638e-06	2.04686e-06			2.84126e-08			8.043e-12	0.000834552			1.90652e-11	4.22994e-14		6.16749e-05	4.02701e-22	3.46723e-09		2.12882e-06	2.18506e-10	0.000783193		4.31345e-17	1.60385e-22
cytokine binding	6.63836e-10	2.11204e-16		1.82778e-16	0.000670152	1.07144e-05	7.75446e-08	1.35085e-05	1.62413e-22	1.13319e-21		1.44093e-18	1.97568e-05	4.1727e-06	1.46642e-05	9.94001e-50	6.56861e-06	7.31588e-19	7.86492e-11							1.42715e-24	2.73121e-14		5.94761e-15	3.26881e-10		1.15942e-25	5.37441e-09	2.33018e-16			8.56356e-12	0.00396617			4.77525e-13				8.09972e-10			6.18994e-15	1.94556e-08
passive transmembrane transporter activity	1.18923e-13	1.41699e-37		2.84013e-39	6.83613e-06	4.40307e-07	7.4317e-09	1.83922e-08	2.92567e-34	9.50631e-36		1.72074e-27	1.2457e-05	7.64476e-07	9.32948e-39	1.23642e-127	1.21236e-06	1.59254e-27	7.73813e-13		0.00587413					3.06472e-54	2.28061e-20		3.35244e-22	2.39421e-13		1.29848e-55	4.35699e-15	1.70625e-22			5.1801e-16	0.00509941	0.00200874		6.79126e-17				4.62668e-13			2.74427e-32	2.37735e-10
active transmembrane transporter activity	2.44342e-39	2.71305e-13		3.90455e-100	2.17245e-59	4.73097e-32	1.46918e-30	8.26793e-50	3.123e-49	1.41477e-58	3.5823e-10	5.28884e-46	1.84175e-27	7.29002e-31		5.41257e-94	9.35411e-32	7.39594e-46	9.01488e-29	1.49002e-36		0.00013537	0.000752289	5.12531e-14	1.21603e-27	2.58791e-93	1.94345e-39	4.44865e-21	2.95797e-44	4.16581e-33	2.86205e-09	4.04162e-87	4.07302e-55	4.11536e-36	1.71242e-12	1.19702e-40	1.76077e-39	1.32427e-30		5.2939e-08	2.14892e-31	4.52337e-08	6.40168e-13	4.35989e-23	4.61093e-39	2.40537e-08	1.03427e-13	1.14957e-85	7.5485e-32
ligand-gated channel activity	1.46901e-09	2.4639e-28		2.10272e-15		0.00105103	2.57995e-05	0.0234013	9.85934e-23	1.74704e-22		3.20771e-19	0.00417381	6.02017e-05	9.26025e-14	5.45608e-62	0.000301571	7.08791e-19	9.65796e-10							3.89486e-24	2.61468e-14		1.30918e-13	1.17446e-08		2.0361e-26	2.14848e-06	4.92486e-17			3.19465e-11		0.0245163		3.88813e-12				2.63691e-08			4.91056e-14	4.85424e-07
inorganic cation transmembrane transporter activity	6.23183e-23	4.05215e-10		4.88389e-48	1.17548e-25	1.60445e-18	1.20921e-18	1.99239e-24	2.43937e-34	2.3608e-36	0.00030044	1.16618e-29	3.50894e-15	3.44103e-17		1.67363e-58	1.30759e-17	2.78408e-29	3.43594e-18	8.90392e-16				8.26098e-07	8.74971e-14	4.22941e-52	1.10123e-25	2.85661e-10	6.18991e-28	6.64031e-21	0.00173254	2.81236e-51	6.40263e-29	4.92898e-25	2.44064e-05	3.34875e-18	1.05159e-24	8.86955e-16		0.0034628	1.11836e-21	0.00220545	1.26773e-05	4.19888e-12	9.43486e-23	0.0118047	5.99176e-05	4.91463e-42	1.52264e-19
substrate-specific transmembrane transporter activity	5.13174e-29	3.06613e-25		1.94907e-117	1.06212e-52	3.14209e-22	1.58482e-21	2.7666e-41	8.79685e-48	2.4806e-56		2.52267e-41	9.31532e-18	2.93198e-19	3.75124e-21	1.29155e-147	3.94621e-20	2.33563e-41	4.8138e-22	2.81717e-23				0.000281985	2.21578e-13	8.85282e-109	1.35739e-33	3.12051e-08	5.29966e-39	6.28229e-26		1.56066e-101	1.42258e-47	9.71563e-32		9.23548e-24	1.59801e-30	1.125e-16			2.07169e-26		0.0274954	1.47121e-10	4.13129e-29			3.28006e-89	1.63814e-22
polysaccharide binding	0.0004064	5.38909e-28		4.95084e-09			0.0125001		9.27702e-18	4.98769e-14		7.01688e-12			1.56014e-19	5.39282e-72		1.13232e-11	8.32496e-05		0.0142522					1.3765e-18	6.94182e-09		1.08634e-08	6.78482e-05		1.9775e-20	0.00495066	1.22919e-11			6.77078e-06		0.00994944		5.72075e-08				0.00101958			1.62117e-07	0.00183531
peptidase inhibitor activity		4.03489e-27		1.82313e-05					2.07453e-16	1.34672e-12		2.24339e-10			5.55087e-22	7.28911e-66		2.55408e-10	0.000634332		0.000155199					3.4852e-15	2.61793e-07		3.91805e-07	0.00124909		9.096e-18		4.6497e-10			0.000802234		6.00468e-05		6.50252e-07				0.033678			0.000236658
GTPase regulator activity		5.42038e-50	3.01849e-16	5.78743e-05	6.43595e-29			1.35079e-08	0.000119231		3.86671e-21		0.000752961	2.37765e-06	7.23733e-135	6.81281e-134	9.60725e-06			1.23598e-29	7.8512e-42	2.20777e-30	1.22202e-15	1.6552e-13	1.16342e-17			1.0093e-19			1.52737e-23	0.0160122	0.00313999		3.48336e-24	7.96672e-33		1.72198e-16	1.39366e-36	2.44512e-19		1.55922e-13	3.73402e-24	1.3268e-12		1.16185e-30	1.88577e-42	3.8536e-06
protein complex binding		7.0177e-38	2.07434e-05						1.52296e-10	4.87897e-05	0.00358731	0.00076394			1.72605e-50	4.35222e-95		0.00333788			2.23123e-14	7.65947e-08	0.00935939			5.25634e-08	0.0439722				0.000198818	3.87832e-11		6.72305e-05	0.000515914				1.0859e-13	0.0032337	0.0142138		0.00269592			1.48673e-07	3.79465e-09
ribonucleotide binding		5.55228e-60	7.41823e-16		4.83946e-44			1.56902e-06	1.33267e-11	0.00690468	1.81592e-16				1.78944e-307	2.19873e-222				6.14775e-38	1.52328e-44	2.96845e-29	1.77235e-12	6.67857e-10	2.29704e-12	7.75931e-09		2.22341e-15			5.82531e-21	2.04063e-16		0.0019147	7.98366e-20	5.55911e-34		2.72023e-09	3.54979e-38	9.3039e-16		2.45754e-10	1.48521e-18	1.98231e-07		3.46765e-31	5.23746e-43
phosphoric ester hydrolase activity		4.02944e-42	2.86876e-06						1.24651e-14	3.27649e-07	5.23639e-06	2.25441e-05			1.16213e-74	4.52307e-117		0.000140824		0.000986965	1.07391e-19	2.49094e-11	0.000241714			1.58381e-11	0.00754672	0.00680497	0.00366273		3.26598e-07	6.36241e-17		1.87401e-06	6.75954e-07	0.000211253			2.40894e-18	1.07258e-05	0.000387484	0.0102528	1.41665e-06			5.17384e-11	2.41212e-14
identical protein binding		1.10677e-45	3.13395e-08		9.71004e-05				4.46691e-12	2.16252e-05	1.03991e-05	0.00151955			1.61179e-121	1.11384e-157		0.00612883		8.42486e-08	2.84965e-22	3.07846e-13	5.18784e-05	0.0294062		3.44455e-12		0.0012514			3.90724e-08	4.44993e-17		3.73841e-05	5.16645e-07	2.16811e-07			2.21631e-19	7.66324e-06	0.0162525	0.00308514	2.8556e-06			2.72029e-13	5.60338e-17
cation binding		1.25752e-55	5.29426e-09	1.20857e-07	7.89203e-09				2.69894e-20	1.37619e-13	4.83065e-06	5.15714e-09			6.094e-297	4.17235e-239		1.83696e-08		1.07876e-11	9.06107e-28	3.03038e-15	5.13969e-05			2.26182e-34	1.20283e-05	0.00148732	2.72071e-06		3.41102e-09	3.35364e-40		2.46675e-09	1.29018e-07	5.46638e-09			5.87373e-24	2.84416e-06	9.38571e-06	0.00424421	1.41141e-06			4.38836e-16	4.75583e-21	0.0256376
ATPase activity, coupled to movement of substances	4.42474e-06	4.50655e-22		1.1435e-09			0.00128976		1.64923e-17	9.26034e-16		5.30605e-14		0.0066714	3.96712e-10	5.36972e-47	0.0266107	3.89507e-14	3.46908e-07							3.40373e-17	4.19224e-10		1.28762e-09	4.05017e-06		1.24746e-18	0.00101609	3.1883e-13			1.2737e-07				4.64544e-09				1.47081e-05			6.77856e-09	8.11208e-05
sequence-specific DNA binding	6.39408e-09	2.98203e-39		2.4386e-36	0.000604528	4.2505e-05	2.62262e-06	1.13457e-06	6.66542e-30	1.80573e-28		4.35378e-21	0.00828297	0.00180449	1.18457e-59	5.52064e-156	0.00161093	2.16597e-20	1.79342e-08		0.000201275					7.59449e-52	4.0184e-16		8.59825e-18	3.88552e-10		3.2359e-54	2.38342e-12	2.83294e-18			1.00372e-11		0.000747662		6.72571e-14				5.18946e-09			5.17364e-27	2.23913e-07
structure-specific DNA binding		8.37882e-30	0.00296046						1.597e-08	0.00265677		0.0105068			1.88872e-30	5.03351e-70					4.95232e-09	9.20286e-05				4.18386e-05					0.0406651	6.2846e-08		0.000435256	0.0491682				8.86376e-09		0.0291429					0.000372254	3.2169e-05
DNA regulatory region binding	0.0405228	8.072e-24		8.67503e-05					2.20261e-13	3.89093e-10		1.28224e-08			8.58581e-16	3.47759e-58		7.70088e-08	0.00727064		0.0200028					3.30414e-12	2.61627e-06		7.76925e-06	0.0046241		1.25187e-14		6.94599e-09			0.00125819		0.0119914		2.65011e-06							0.000721402
metal ion transmembrane transporter activity	1.74111e-22	6.4445e-11		1.51204e-37	4.80852e-20	6.84394e-17	3.63508e-18	7.53655e-20	9.44964e-32	2.45274e-33	2.46692e-05	8.29716e-29	4.83106e-15	1.0463e-17		8.95275e-52	1.03333e-17	1.4208e-28	5.65939e-19	5.83194e-13				1.66109e-07	9.35321e-14	3.00735e-41	1.91704e-24	2.01355e-10	9.83026e-26	3.61463e-20	0.000600654	1.87674e-40	5.35751e-24	1.87429e-24	1.36583e-06	4.74525e-16	3.05802e-24	6.43908e-16		0.000837673	5.34518e-21	0.000376426	9.24634e-07	8.26316e-13	2.52132e-22	0.00642448	1.79e-05	3.95646e-34	1.23338e-19
protein heterodimerization activity		1.18032e-34	0.0047078	0.0413797					9.51713e-14	1.42603e-08		1.04078e-06			8.64375e-39	7.95058e-90		3.23413e-06			1.48008e-09	0.000291226				2.0585e-12	0.000106073		0.000264902			1.52581e-15		7.94785e-08					2.10719e-09		9.51163e-05					0.000623927	0.000137431
protein dimerization activity		2.34297e-46	5.06381e-07						1.19932e-14	2.65097e-08	0.000250946	9.64178e-06			9.72576e-105	3.80723e-153		3.04775e-05		0.0003211	9.02263e-20	4.89507e-11	0.000919861			5.05025e-16	0.00133705		0.00158087		2.23133e-06	1.18416e-20		5.84241e-07	2.36012e-05	0.000608207			1.16164e-17	0.000180406	0.000732157	0.0427445	0.000124281			5.33627e-11	1.068e-13
coenzyme binding	2.09519e-06	1.67195e-34		4.22918e-13			0.00106902		4.35088e-24	1.51201e-22		1.34549e-18		0.0337599	4.98472e-27	2.09381e-80		3.69937e-19	1.00455e-08		7.8972e-06					4.76716e-26	6.53691e-13		6.14218e-13	2.82314e-07		5.0162e-28	0.000411891	3.83137e-16			2.57508e-08		1.99453e-07		6.74363e-11				3.19157e-06			1.51735e-11	0.000106887
GTPase binding		1.50283e-31	9.04312e-11	0.0462079	8.44976e-10			0.000991835			4.11497e-14		0.00422905	0.00011864	4.37183e-42	3.82155e-55	0.000422425			1.97989e-11	1.9362e-22	1.74234e-17	7.31895e-11	4.70489e-09	4.53395e-10			2.16471e-11			5.78345e-14				2.10193e-15	7.42029e-14		4.81416e-10	3.12376e-21	1.53951e-12		1.18543e-09	1.9036e-15	4.0227e-08		2.04311e-16	1.55487e-21	0.00726148
unfolded protein binding	7.57193e-07	6.11832e-32	2.51354e-15	2.00542e-10	6.15703e-18	4.60218e-05	0.00111116	2.47707e-10			8.96182e-17		3.8824e-09	6.4027e-11	1.4993e-46	6.27616e-56	2.69759e-10		0.00114984	7.01451e-19	1.21341e-25	6.14207e-22	9.16958e-15	1.65427e-13	9.14702e-16			2.29877e-16			9.80134e-18		6.51338e-08		1.09017e-18	1.96351e-21	0.00255579	4.66207e-16	3.19345e-23	1.62624e-15		1.5231e-13	3.47331e-18	6.87124e-13	1.15566e-06	9.99729e-21	3.07457e-26	1.78911e-11	0.00314396
endopeptidase regulator activity		4.10967e-28		0.00103854					6.14781e-15	7.9097e-11		6.37078e-09			1.20983e-23	5.82912e-65		7.52406e-09	0.00575848		9.52819e-06					5.93609e-13	3.94694e-06		7.815e-06	0.0112315		1.43087e-15		6.0277e-09			0.00944928		2.85908e-06		6.48443e-06							0.00851578
[truncated: 41 more columns]

## Sheet: NumOfPolarAAsWithPositiveCharge
Class	magnesium ion binding	peptide receptor activity	G-protein-coupled receptor binding	purine nucleoside binding	DNA binding	transcription coactivator activity	transcription corepressor activity	RNA binding	motor activity	GTPase activity	carboxylesterase activity	helicase activity	nuclease activity	protein tyrosine kinase activity	receptor activity	olfactory receptor activity	receptor signaling protein activity	guanyl-nucleotide exchange factor activity	Ras GTPase activator activity	receptor binding	cytokine activity	cytokine receptor binding	hormone activity	potassium channel activity	iron ion binding	calcium ion binding	calmodulin binding	sugar binding	phospholipid binding	protein C-terminus binding	growth factor activity	cytoskeletal protein binding	transcription factor binding	translation factor activity, nucleic acid binding	UDP-glycosyltransferase activity	peptidase activity	cysteine-type peptidase activity	metallopeptidase activity	anion transmembrane transporter activity	primary active transmembrane transporter activity	tubulin binding	lipase activity	oxidoreductase activity, acting on CH-OH group of donors	oxidoreductase activity, acting on paired donors, with incorporation or reduction of molecular oxygen	transferase activity, transferring one-carbon groups	transferase activity, transferring acyl groups	transferase activity, transferring glycosyl groups	transferase activity, transferring phosphorus-containing groups	nucleotidyltransferase activity
magnesium ion binding
peptide receptor activity	5.04421e-32
G-protein-coupled receptor binding		1.78497e-21
purine nucleoside binding		6.8593e-49
DNA binding	0.000227544	1.08543e-46		1.20807e-30
transcription coactivator activity		1.75181e-17			4.93868e-10
transcription corepressor activity		3.01897e-24
RNA binding	0.000134505	2.48233e-43		5.1122e-18		1.02039e-08
motor activity	0.000170561	3.0663e-35		5.1066e-06		3.93551e-05
GTPase activity		3.27954e-30			3.80371e-06			1.44197e-05	0.000941101
carboxylesterase activity	0.0123259	7.09941e-12		1.09646e-05	9.65033e-12			5.89461e-12	5.73106e-12	0.0352751
helicase activity	3.68924e-05	8.28106e-37		6.10623e-07		7.23596e-06				0.000283679	1.38449e-13
nuclease activity		3.29493e-31									2.36022e-05
protein tyrosine kinase activity		4.82106e-21		0.0353525	7.57575e-10			3.62897e-10	4.80721e-10			6.1951e-11	0.00834594
receptor activity	4.25517e-51		2.15914e-33	6.97575e-284	0	1.11234e-32	4.17906e-38	1.0022e-191	4.55604e-62	1.13742e-56	3.44791e-12	1.71563e-66	1.88341e-55	3.24901e-27
olfactory receptor activity	2.90562e-73	2.21326e-18	7.49869e-54	4.88263e-206	4.77283e-206	6.80662e-63	6.00583e-62	2.69031e-154	1.19451e-65	1.80424e-85	8.2768e-43	3.38751e-68	1.85948e-70	9.80023e-59	8.40441e-68
receptor signaling protein activity		6.6928e-23			1.84587e-10			8.95164e-11	1.42543e-09			3.9252e-11	0.0464664		1.91755e-34	2.30624e-62
guanyl-nucleotide exchange factor activity		1.25697e-32						0.0158757	0.00561175		3.7682e-05	0.00594677		0.0212632	5.52892e-54	1.84421e-67
Ras GTPase activator activity		1.40127e-27									0.00107022				5.80222e-37	6.06738e-51
receptor binding		1.35481e-29		0.000169282	2.7504e-40			1.26073e-26	6.91524e-10			3.77666e-11			1.28762e-124	1.25177e-143
cytokine activity		7.10841e-18			8.24324e-08			6.54423e-07	0.000752584			0.000232929			1.92111e-32	5.83833e-59
cytokine receptor binding		9.87976e-19			1.32736e-10			8.49211e-10	1.06585e-06			1.10036e-07			6.69533e-30	5.19545e-63
hormone activity		2.50954e-14			0.0115141			0.0209094							1.06639e-19	8.96658e-40
potassium channel activity	2.34367e-06	1.50656e-15	0.000761974	1.49283e-12	5.72898e-20		0.00041992	1.92083e-20	2.59569e-20	1.42922e-05		2.97011e-23	4.70808e-11		1.59106e-16	9.94482e-52		7.37822e-12	3.60366e-08
iron ion binding		9.08883e-36			3.08259e-07			1.42078e-07	1.03361e-06		0.00238345	4.81392e-08			1.06383e-66	1.04669e-84								7.64882e-09
calcium ion binding	1.24387e-07	2.53992e-14	1.53081e-05	1.52305e-34	2.46602e-71		2.46757e-06	5.00078e-51	2.73172e-22	3.26266e-08		1.94807e-24	3.1062e-12		3.0943e-44	2.16635e-111		1.73679e-10	5.31483e-07	3.85412e-08	0.0412638				2.24519e-09
calmodulin binding		8.97819e-32									3.75256e-07			9.21692e-05	1.20539e-52	5.77027e-65	0.000628081			0.0002992		0.00505928		1.23378e-12		5.43878e-15
sugar binding	2.26289e-10	1.82253e-09	2.88902e-07	9.62473e-23	1.79954e-34	0.00729475	6.70322e-08	7.65443e-32	3.98076e-24	1.5608e-09		1.64107e-25	1.64852e-14		8.54221e-12	1.24986e-56	0.00107668	6.27515e-14	3.57504e-10	2.00722e-07	0.0011688		0.0108697		3.41491e-12		7.78905e-17
phospholipid binding		2.07821e-28			0.000193173			0.000331787	0.00610604		0.00960458	0.00294974			1.56259e-51	1.04686e-73								1.25133e-06		3.28547e-08		1.96666e-10
protein C-terminus binding		1.82512e-22			2.81102e-05			4.41954e-05	0.000386856			7.76571e-05			8.61518e-34	4.72229e-58								0.0128525		0.00282353		1.66128e-05
growth factor activity		3.7998e-23									0.0101021				2.43717e-40	6.31871e-60								6.87468e-06		2.38624e-08		1.31486e-09
cytoskeletal protein binding		2.48293e-41			0.000168222			0.00501842			3.60069e-07			0.000341945	1.57475e-137	9.55013e-136	0.00189646			7.30585e-07		0.0108651		5.14461e-14		6.03111e-28		2.30347e-22
transcription factor binding		1.51583e-27			1.33879e-21			1.79939e-16	1.99189e-07			2.59046e-08			8.63034e-86	4.30086e-117								0.0152637		3.39992e-07	0.0118052	2.15627e-07				0.00227302
translation factor activity, nucleic acid binding		2.3596e-27		0.0336048		0.0089833					5.80867e-08			7.66938e-06	3.27557e-40	1.83971e-47	1.48206e-05			1.95034e-05	0.0315185	0.000313158		5.09143e-13	0.0130633	7.35826e-14		3.84951e-16					0.000790781
UDP-glycosyltransferase activity		3.47282e-28						0.0390092	0.0132816		0.00114257	0.00533987			7.5875e-42	5.54671e-58								2.61164e-08		2.73549e-07		1.07276e-10
peptidase activity	0.000363201	4.7124e-24	0.00333102	6.06611e-22	1.51152e-55		0.00228516	7.23721e-43	1.58534e-21	0.000212142		5.57185e-24	9.31948e-10		2.64581e-70	8.56868e-120		1.93998e-08	6.68346e-05						1.66252e-05		1.7032e-12		2.42864e-05		5.39549e-06	2.78416e-21	0.0244219	1.69859e-12	2.46236e-05
cysteine-type peptidase activity		3.38526e-31			0.0155485			0.0075461	0.0087055		0.00204559	0.00269192			1.15335e-48	1.55071e-67								9.69991e-08		1.92928e-08		2.32304e-11								2.19184e-05
metallopeptidase activity		1.3087e-27		0.00354479	5.66398e-14			3.21873e-14	6.90078e-13			1.1405e-14	0.000879842		1.83713e-41	3.5598e-76		0.00170896									6.22755e-06	0.00208129				3.95069e-06		3.87139e-07
anion transmembrane transporter activity	1.47777e-24		1.02627e-16	5.39997e-43	2.46448e-46	7.99513e-13	1.3219e-18	3.31551e-43	9.04737e-34	1.10514e-23	1.19632e-05	1.95495e-36	2.90709e-27	1.35084e-12		4.63847e-23	1.17741e-15	4.92387e-28	4.28528e-22	8.16151e-23	3.96027e-13	3.68208e-12	1.95958e-10	5.91124e-07	7.12456e-29	6.4538e-08	7.54385e-28	0.00578515	2.0864e-23	1.19094e-16	2.53661e-19	2.27618e-37	1.16816e-21	1.59058e-24	2.5219e-23	2.26447e-15	1.27891e-24	5.44977e-18
primary active transmembrane transporter activity	1.63352e-11	1.51983e-05	5.99965e-07	3.04687e-18	1.32116e-22	0.00396837	7.60689e-08	9.0827e-22	9.19116e-20	4.69234e-09		8.66043e-21	2.78932e-13	0.00112811	0.00240901	6.47203e-37	1.55515e-05	5.44428e-14	3.88059e-11	5.85745e-07	0.000685375	0.00740926	0.00461346		1.79653e-13		3.24135e-15		1.0633e-09	4.98053e-06	1.80603e-08	2.74208e-17	9.65176e-07	9.53484e-15	8.0496e-11	0.0101144	3.20332e-12	5.23885e-06
tubulin binding		7.64507e-26									4.97308e-05			0.00948845	5.50204e-37	2.49925e-50								4.06432e-09		1.33033e-09		5.5401e-12								1.0554e-07		0.00198913	1.03682e-21	1.96415e-11
lipase activity	0.0463764	1.26641e-10		7.32646e-05	1.19336e-11			1.37764e-11	3.00179e-11			2.91994e-12	0.000129341		1.6293e-11	1.15831e-40		0.000549103	0.0077416						0.0376558		1.46448e-06		0.0288649		0.0151302	1.12807e-06		2.69179e-07	0.0100585		0.00967675		2.17739e-05		0.000176107
oxidoreductase activity, acting on CH-OH group of donors	0.0235721	1.98303e-19		6.40226e-06	6.03922e-13			7.70176e-14	6.38456e-15			1.87679e-17	1.85066e-06		2.38008e-21	1.13669e-51		2.20459e-06	0.000452696						0.00078897		3.53523e-08		0.00678221		0.00572459	6.42428e-08		1.45158e-09	0.000165121		0.00148183		3.62674e-10	0.0149586	1.34772e-05
oxidoreductase activity, acting on paired donors, with incorporation or reduction of molecular oxygen		1.49809e-32			0.00369659			0.00098333	0.00034485		0.000826931	1.51937e-05			1.74933e-49	1.55062e-65								2.65443e-09		7.73876e-08		3.43073e-11								5.78141e-05			3.02111e-26	1.07843e-12		0.0190402	0.000171011
transferase activity, transferring one-carbon groups		1.24512e-30			0.0148552			0.0156177			0.00113746	0.0288415			6.45879e-54	4.71337e-74								4.08772e-08		9.28772e-10		7.28854e-12								9.9747e-07			4.02851e-25	1.4139e-11		0.00527586	0.000556164
transferase activity, transferring acyl groups	0.0286858	3.67608e-20		3.05752e-08	1.6059e-21			3.60309e-20	2.62702e-15	0.0374172		3.63718e-17	2.50793e-06		1.58169e-32	4.67106e-75		9.1188e-06	0.002142						0.00362945		1.60869e-08		0.00605561		0.00193696	2.1649e-10		2.30876e-09	0.00150195		0.00226821		4.45276e-12		1.66804e-05			0.00229008	0.000498183
transferase activity, transferring glycosyl groups		2.64501e-32			9.5899e-10			2.79771e-09	6.92315e-07		0.0189848	1.16905e-07			1.89014e-68	1.16084e-91								3.01377e-07		1.08062e-08		5.30637e-11						0.0101612		3.03861e-05			1.0278e-26	8.53183e-11			0.00641814			0.0162161
transferase activity, transferring phosphorus-containing groups		5.31099e-45			5.92212e-20			7.80201e-14	1.55411e-05		1.89184e-05	4.14487e-06		0.0351205	3.7419e-198	1.34487e-171				0.00371667				3.27042e-12		1.04538e-27		6.29803e-21								1.36487e-18		0.00301558	8.38524e-40	4.02451e-17		0.000123579	5.41735e-06			1.08788e-07
nucleotidyltransferase activity		9.04458e-27									0.00305319				1.09309e-39	7.46773e-58								7.69537e-07		3.1356e-07		1.38496e-09								7.43012e-05			1.99844e-21	1.06621e-09		0.0167157	0.00186717			0.00418191
hydrolase activity, acting on ester bonds		1.0561e-37		0.024142	6.76697e-33			1.55977e-24	1.49639e-11			2.58651e-13			5.28552e-138	3.20753e-154								3.85401e-05		6.44715e-12	0.000218398	1.78485e-11				3.07764e-06		9.78803e-06		7.29409e-05			2.59481e-30	8.06224e-11
thiolester hydrolase activity		4.08534e-27									0.0017777				5.96857e-37	8.82251e-52								9.68354e-08		6.15716e-07		3.26352e-10								7.58565e-05			1.04324e-21	6.72642e-11		0.00900154	0.000446012			0.00244239
hydrolase activity, acting on glycosyl bonds	3.16905e-08	1.31876e-08	2.75443e-05	1.99229e-14	1.48376e-20		1.07539e-05	3.42577e-20	6.06623e-19	3.37333e-07		6.42054e-21	3.44855e-11		9.97657e-08	1.47378e-43	0.0183442	4.07087e-11	7.98032e-09	0.000482968	0.0364899				1.13549e-09		3.72122e-13		9.37561e-08	0.000307084	6.85023e-07	8.93327e-15	0.000276524	3.31963e-13	7.30917e-09		5.36672e-09	0.0106112	0.0232898		8.77607e-10			1.04759e-09	4.81904e-09		4.21425e-08	1.40836e-13	5.90122e-08
hydrolase activity, acting on carbon-nitrogen (but not peptide) bonds		2.66897e-16		0.000169146	8.07617e-12			4.61738e-12	3.63197e-12			3.98266e-13	0.00013208		2.02275e-18	2.61891e-50		0.000469528	0.0123195						0.0393962		1.21568e-06				0.0285589	1.75666e-06		9.5247e-08	0.0125479		0.0195792		1.25017e-08		0.000208771			0.0175566	0.00928236			0.000219928	0.0314278
hydrolase activity, acting on acid anhydrides		8.88354e-42			7.09994e-14			2.99022e-09	0.0078181		2.06929e-05	0.00304386		0.0374853	4.21936e-170	5.56156e-161				0.000566901				1.72992e-11		7.13714e-27		9.74705e-20								3.34105e-18		0.00186423	4.93363e-37	3.73927e-15		7.30737e-05	1.03988e-05			7.86608e-08
hydrolase activity, acting on acid anhydrides, catalyzing transmembrane movement of substances	8.51934e-11	1.30131e-06	3.76342e-06	1.73783e-16	5.50371e-20	0.0182883	4.82239e-07	2.15749e-19	2.72675e-18	3.93046e-08		1.66753e-19	2.24571e-12	0.00287438	0.000476723	6.86723e-39	4.14011e-05	1.81069e-13	9.86675e-11	7.34525e-06	0.003568	0.0299423	0.0165558		5.98589e-13		4.26343e-14		7.88927e-09	2.0177e-05	1.63065e-07	1.55625e-15	1.03021e-05	7.56684e-14	2.34488e-10	0.0398246	1.48291e-11	1.40555e-05			1.34035e-10		0.0238464	2.55635e-12	9.75201e-11		5.16485e-10	1.44539e-15	4.57835e-09
ligase activity, forming carbon-nitrogen bonds		1.76031e-33			1.68046e-15			1.97697e-14	1.0118e-10			4.64449e-12			3.66129e-66	3.46003e-100								0.0121376		2.22154e-05	0.000360808	1.62936e-07				0.000303572		8.03799e-06					2.48069e-23	2.97433e-09
ATPase activity		8.41115e-33			8.31457e-09			3.61708e-07	0.00223134		0.0182483	0.000717406			2.38197e-79	3.055e-108								9.13649e-06		8.58796e-12		2.17465e-11								2.69098e-06			3.09476e-26	4.71224e-10		0.0372275				0.00864663
purine nucleotide binding		4.26445e-49			1.16274e-34			2.70473e-19	3.51273e-06		1.10268e-05	4.64706e-07		0.0396984	6.18287e-308	4.00453e-213				0.000104685				1.38148e-12		5.86295e-36		6.4183e-23						0.028716		8.41547e-23		0.00332247	2.7605e-43	4.12671e-18		7.01975e-05	6.45826e-06			2.42852e-08
SH3 domain binding		8.48763e-19			4.67934e-06			1.50689e-06	3.57987e-07			5.20959e-08			1.33729e-23	7.49794e-46											0.02165	0.012855						0.000900789					9.38006e-13	0.000251981
serine hydrolase activity	1.39778e-10	6.12577e-08	4.0036e-07	7.37763e-22	4.31227e-32	0.00475714	7.40589e-08	5.99115e-30	4.74874e-23	5.98518e-10		1.85439e-25	2.47119e-14		3.15916e-09	5.20974e-49	0.00119081	2.7129e-14	1.83445e-10	2.903e-07	0.00111593	0.030822	0.00717579		2.50554e-12		1.97494e-16		1.89862e-10	1.01349e-05	1.48551e-09	2.74289e-21	2.39085e-07	1.0263e-15	6.22703e-11		3.10909e-11	0.000521561	0.0367799		7.50312e-12			1.09861e-11	5.76843e-12		2.60413e-11	2.64212e-20	4.92008e-10
guanyl nucleotide binding		2.25685e-39			3.63477e-10			1.674e-08	0.00010722		0.000265466	2.49393e-05			2.02325e-105	3.05158e-124								1.21557e-09		1.40908e-16		9.34756e-16								9.98555e-11			5.50315e-33	8.84484e-14		0.00136846	0.000185142			2.78235e-05
growth factor binding	0.000154602	4.05373e-09	0.0135833	1.56409e-08	4.85687e-15		0.00449835	1.16438e-14	3.22194e-13	0.000775018		2.89514e-15	4.70667e-07		2.85283e-09	1.69187e-40		3.92744e-07	2.45978e-05						1.48947e-05		6.38897e-09		0.000344975		0.000551129	1.96808e-09		2.75514e-09	4.22299e-05		3.41777e-05		0.00209234		2.09153e-06			7.64131e-06	2.27892e-05		0.000254075	4.61736e-08	0.000143911
enzyme binding		1.32419e-32		0.00530115	8.2187e-31			2.51249e-23	5.25574e-11			1.50189e-12			1.22277e-110	2.1607e-134								0.00209044		2.34015e-08	0.000211847	1.00789e-08				2.31786e-06		1.14833e-05		0.0127948			2.10042e-25	1.09374e-08								0.0203958
kinase binding		1.27565e-22			4.80592e-13			1.95039e-12	1.93422e-09			1.28968e-10			1.94249e-39	3.3651e-71											0.000586459	0.00111627				0.000551194		3.17439e-05					6.66902e-16	4.95101e-05
protein domain specific binding		7.96222e-27			6.61436e-18			6.71067e-15	5.44583e-08			7.5006e-09			4.51888e-70	2.12312e-100								0.020713		1.27972e-05	0.00772769	7.83063e-07				0.00267468		0.00033831					1.98236e-20	6.35983e-07
cytokine binding	4.46303e-20		1.67995e-13	1.12328e-31	3.77179e-34	2.82746e-09	3.8319e-15	2.24503e-32	1.4402e-27	6.70487e-19	0.000533647	6.32883e-30	1.17584e-21	1.9239e-10		1.64486e-26	4.22074e-12	1.12375e-22	1.96736e-18	3.07788e-16	6.99369e-10	2.1265e-09	4.81545e-08	3.24549e-05	8.74281e-23	0.000138591	4.32846e-23		2.57222e-18	2.96948e-13	3.32982e-15	1.81381e-28	1.2775e-15	1.88328e-20	6.99709e-19	9.11303e-11	2.51858e-20	1.883e-14			4.17719e-18	0.00120721	3.6633e-08	2.60275e-21	4.55523e-20	4.75514e-09	2.66062e-20	1.41213e-29	1.1681e-17
passive transmembrane transporter activity	1.76222e-16	5.01231e-15	2.17755e-10	7.34407e-50	3.02426e-71	2.17433e-05	2.14753e-11	2.3747e-59	5.85146e-35	4.93839e-16		1.8294e-39	3.73506e-23	0.0048456	3.96789e-28	5.12065e-92	1.36297e-06	1.98792e-23	1.11429e-15	1.13548e-15	3.77223e-06	0.00155189	0.000278269		3.81107e-22		2.16774e-24		6.48273e-17	8.13083e-09	2.86304e-14	7.8178e-41	2.3552e-14	5.9103e-22	5.80321e-17	0.000426012	1.52392e-17	7.04723e-07	8.71519e-06		7.84411e-17			2.11995e-19	3.41327e-19		2.35869e-20	1.86043e-43	5.48654e-15
active transmembrane transporter activity	1.19877e-45		1.65097e-32	3.77401e-116	1.91005e-124	2.79634e-33	7.28552e-37	2.32066e-99	8.50538e-50	5.17088e-49	8.67599e-18	4.53464e-52	5.79646e-47	2.11461e-30	3.08383e-09	5.94223e-05	6.27383e-35	7.54694e-46	3.08979e-34	8.90301e-73	3.02053e-32	6.61517e-32	2.13621e-22	6.48795e-23	8.17909e-54	4.11831e-42	3.63034e-45	4.30099e-20	5.55784e-45	1.78694e-33	2.09547e-37	5.0981e-84	2.28081e-61	1.11445e-35	7.99814e-38	5.69846e-55	1.5748e-43	6.27735e-41	0.00612277	1.06874e-10	2.86778e-34	4.60268e-17	8.9094e-26	3.40746e-43	9.30397e-47	3.693e-35	6.61508e-55	7.62025e-100	1.10452e-36
ligand-gated channel activity	1.53796e-10	1.18926e-13	4.63759e-06	3.24076e-18	5.89048e-24		1.60808e-06	3.44792e-24	1.26259e-23	1.89084e-08		5.73599e-27	1.11464e-14		2.00178e-12	1.3265e-51	0.000992718	2.59343e-16	7.7657e-12	6.54771e-05	0.0120581		0.0375861		9.81643e-14		2.8065e-16		9.18574e-10	4.35374e-05	2.87325e-08	2.13989e-18	3.2677e-05	3.84047e-16	7.02769e-12		8.01278e-12	0.00138186	0.00020884		6.21023e-12			1.17895e-13	8.44344e-12		2.97521e-11	1.37099e-17	6.28842e-10
inorganic cation transmembrane transporter activity	1.63718e-18		6.09423e-14	7.04722e-40	1.49113e-51	6.05013e-12	7.1005e-16	2.97002e-44	1.04184e-25	1.23671e-19	0.000157981	3.6521e-27	5.05871e-21	2.4757e-10		2.89178e-08	3.40883e-12	6.00056e-20	3.14654e-15	3.2796e-23	6.47193e-12	5.23445e-11	6.6858e-09	1.51867e-05	4.48048e-21	5.05116e-10	6.88989e-22	0.00102155	2.43957e-18	5.94619e-13	8.64349e-17	4.00592e-34	4.65006e-21	7.84988e-19	3.51419e-16	5.27058e-15	2.97785e-18	7.58335e-14			9.53683e-17	0.000212901	1.61512e-07	3.85642e-18	7.01677e-20	1.9897e-10	5.86236e-21	8.83148e-36	4.08817e-16
substrate-specific transmembrane transporter activity	1.61308e-30		9.57743e-21	1.84552e-126	9.18451e-168	4.75358e-18	1.88133e-23	6.62033e-113	8.49991e-45	3.51321e-33	0.000201138	1.6202e-48	3.24446e-36	1.51736e-13		4.75117e-52	1.84323e-18	5.64139e-35	7.89525e-24	2.44041e-56	3.16648e-18	2.22805e-15	1.05577e-11	8.9821e-06	3.57674e-39	1.07382e-15	8.16608e-36	0.0105351	2.07006e-31	1.21936e-19	3.21226e-26	2.39666e-79	1.24116e-43	4.80138e-29	1.54732e-26	3.94574e-29	5.34726e-30	3.86086e-21			3.47198e-25	0.000200027	2.7738e-09	1.12938e-30	1.31392e-33	1.2654e-14	1.04558e-39	6.19907e-99	4.06299e-25
polysaccharide binding		7.72567e-17			3.33027e-08			1.05784e-07	3.05187e-05			8.03023e-07			9.82382e-27	1.48224e-57																		0.00349061					1.32384e-11	0.0105532
peptidase inhibitor activity	0.000395056	2.0188e-14	0.0169174	1.10651e-09	3.27188e-19		0.00827668	1.80114e-18	2.01854e-15	0.00146166		1.0726e-17	1.4429e-07		2.05524e-18	9.65984e-57		4.17247e-07	4.59265e-05						2.32608e-05		1.0642e-09		0.000395868		0.000342567	5.29653e-11		2.95744e-10	5.23653e-05		6.23329e-05		4.76717e-07		1.49536e-06			1.32079e-05	2.02685e-05		0.000365797	4.12718e-09	0.000154118
GTPase regulator activity		2.50776e-45			3.93768e-06			1.82191e-05	0.00459289		3.81922e-08	0.00277645		5.66066e-05	2.22975e-133	1.59158e-128	0.00187375			3.35689e-05		0.0160687		1.93126e-17		4.86174e-26		7.05195e-24								7.2709e-21		5.07373e-07	1.27536e-41	3.78254e-20		7.89246e-07	5.89707e-10			3.34591e-11
protein complex binding	0.00567661	1.38827e-17	0.0330341	1.50544e-10	4.46481e-26		0.0208711	1.05164e-23	1.4115e-16	0.00616987		2.59336e-18	3.29938e-07		8.13414e-31	9.39895e-74		3.42844e-06	0.000693049						0.000712277		1.31764e-09		0.00109784		0.000294567	1.87792e-12		4.81213e-10	0.000515917		0.000479373		1.64407e-10		3.69745e-06			0.000645037	8.77877e-05		0.00272901	1.30286e-09	0.00117649
ribonucleotide binding		8.01501e-49			4.38985e-32			5.92785e-18	1.11939e-05		6.88721e-06	2.09711e-06		0.0241764	2.5054e-302	4.11101e-211				3.12813e-05				6.81024e-13		1.57385e-36		3.08732e-23								1.34186e-23		0.00144622	2.6104e-43	3.84027e-18		4.10595e-05	3.51918e-06			1.0119e-08
phosphoric ester hydrolase activity		5.2608e-31		0.000218516	2.75586e-23			9.38751e-21	9.54357e-14			7.05552e-16	0.00120008		2.52285e-70	6.40752e-108		0.0251466								0.000814183	2.42814e-06	4.03073e-06				1.08785e-07		2.14934e-07					1.73193e-22	1.86766e-07	0.00313038							0.000492821
identical protein binding		5.99193e-27		8.11523e-09	3.48927e-42			2.72453e-30	5.61472e-13			1.52855e-14	0.000784149		5.66025e-92	3.75418e-128		0.0253045								0.00102447	1.47498e-06	0.000143329				1.11448e-10		1.55793e-07					2.39966e-19	7.19057e-05	0.00203616							5.94584e-07
cation binding		7.6439e-44			2.57116e-22			9.95516e-10			1.69511e-05			0.0144443	0	1.49383e-217				7.81284e-11		0.0351694		2.54451e-11		1.07524e-42		1.89848e-22					0.00107506			3.00146e-27		0.000836858	1.74401e-39	1.70576e-16		3.9738e-05	1.98967e-05			3.52352e-09
ATPase activity, coupled to movement of substances	1.98636e-11	2.14384e-06	1.31821e-06	2.41958e-17	9.95037e-21	0.00831017	1.54842e-07	3.63716e-20	4.03754e-19	1.07537e-08		2.12666e-20	4.67994e-13	0.00128043	0.00100564	1.8779e-38	1.50871e-05	3.61315e-14	2.44744e-11	2.21706e-06	0.00149112	0.0138168	0.00786751		1.1659e-13		8.80105e-15		2.0556e-09	7.1128e-06	4.93413e-08	2.43572e-16	3.29188e-06	1.60897e-14	5.93923e-11	0.0169199	3.32807e-12	4.86029e-06			3.37163e-11		0.0113209	5.48357e-13	2.31323e-11		1.21912e-10	2.1882e-16	1.28346e-09
sequence-specific DNA binding		5.5787e-29		6.51498e-08	2.46467e-38			3.3503e-28	8.53932e-13			1.9072e-14	0.00110094		3.43268e-95	1.09921e-134		0.0302934								0.000191454	2.4837e-06	3.12334e-05				5.84316e-10		3.27312e-07					8.60812e-21	1.4982e-05	0.00303606							2.43627e-06
structure-specific DNA binding		5.31357e-19			0.0130585			0.0254951							3.60288e-31	3.75308e-53								0.00368094		0.000438449		1.63508e-05								0.0460032			4.37676e-15	3.28424e-05
DNA regulatory region binding		2.49835e-14		0.00308935	1.34752e-10			2.39762e-10	5.09445e-09			2.50577e-10	0.00382702		2.23874e-17	2.75334e-47		0.0126659									5.4426e-05					9.63305e-05		5.8282e-06					1.08856e-07		0.00517624							0.00465592
metal ion transmembrane transporter activity	1.1952e-30		6.414e-23	2.22928e-50	5.54447e-52	8.58122e-22	1.1139e-25	2.07982e-47	2.22858e-33	3.01119e-31	2.02147e-14	6.95607e-35	3.3006e-31	5.68404e-22	8.34119e-06		3.40053e-24	3.8574e-31	1.75982e-25	6.11196e-35	3.24476e-21	1.4552e-21	5.65074e-17	1.48512e-17	5.44018e-34	9.20431e-23	7.46624e-31	1.81287e-14	3.09008e-29	1.45093e-23	2.67317e-25	3.38933e-43	1.76255e-32	2.9698e-26	5.55735e-27	2.88614e-29	8.17946e-30	1.40205e-27	0.00458458	6.79207e-09	3.07044e-25	1.07959e-13	9.25448e-20	3.17939e-30	6.19993e-31	2.1689e-23	2.99554e-33	1.30616e-46	3.02397e-26
protein heterodimerization activity	0.0140458	7.03792e-18		1.53408e-08	2.00272e-21			1.59415e-19	8.91176e-14	0.0384181		1.15488e-15	6.06941e-06		1.3172e-28	1.26301e-71		2.86454e-05	0.00154719						0.00104707		2.98229e-08		0.0131171		0.00385538	5.36236e-10		4.89844e-09	0.00235906		0.00189553		6.0047e-10		2.81147e-05			0.000664518	0.000561811		0.013429	9.88977e-08	0.0038121
protein dimerization activity		4.10182e-25		4.75462e-14	2.6002e-44			2.36332e-33	1.27468e-15			8.96839e-18	3.3587e-06		4.01641e-75	1.76592e-125		6.30587e-05	0.00910595						0.00557061		8.92362e-09	0.0224188	0.0166023		0.00205884	2.15288e-14		1.91478e-09	0.00863257		0.00571997		1.10938e-16	0.00297548	4.14449e-05			0.0072623	0.000760843		0.0310836	1.8176e-11	0.014616
coenzyme binding		3.78842e-29		0.00274771	6.04185e-14			2.24215e-14	2.78148e-13			1.25363e-16	0.000437779		9.11858e-44	8.25591e-76		0.000548126									4.59717e-06	0.000327048				4.09142e-06		3.33962e-07					3.71143e-19	4.64827e-07	0.00150335							0.00211272
GTPase binding		1.38948e-23									0.0113281				6.61609e-33	2.76958e-50								7.03037e-06		1.68485e-05		3.88938e-08								0.00142042			4.66025e-19	4.1215e-08			0.00711398			0.0301816
unfolded protein binding		4.51961e-28		0.0393371		0.0125791					2.76125e-08			7.92119e-06	1.00038e-43	1.12578e-52	1.15354e-05			2.83668e-05		0.000717458		4.81028e-14	0.00425209	1.44901e-14		1.68499e-16					0.001123			2.23489e-13		1.02847e-07	7.40999e-26	3.82876e-14		1.54069e-07	4.45085e-10			9.47851e-10	0.00328987
endopeptidase regulator activity	0.00224452	8.33081e-15		3.11888e-08	1.52519e-17		0.0307872	5.63508e-17	2.09071e-14	0.00748857		1.51908e-16	1.10783e-06		7.44963e-19	5.04375e-55		3.86946e-06	0.000228427						0.000200169		7.81432e-09		0.00215581		0.00137334	9.60794e-10		1.55683e-09	0.000302888		0.000392232		1.74234e-07		6.97609e-06			8.98145e-05	0.000129758		0.00253048	8.85955e-08	0.000688039
[truncated: 41 more columns]

## Sheet: NumOfPolarAAWithoutCharge 
Class	magnesium ion binding	peptide receptor activity	G-protein-coupled receptor binding	purine nucleoside binding	DNA binding	transcription coactivator activity	transcription corepressor activity	RNA binding	motor activity	GTPase activity	carboxylesterase activity	helicase activity	nuclease activity	protein tyrosine kinase activity	receptor activity	olfactory receptor activity	receptor signaling protein activity	guanyl-nucleotide exchange factor activity	Ras GTPase activator activity	receptor binding	cytokine activity	cytokine receptor binding	hormone activity	potassium channel activity	iron ion binding	calcium ion binding	calmodulin binding	sugar binding	phospholipid binding	protein C-terminus binding	growth factor activity	cytoskeletal protein binding	transcription factor binding	translation factor activity, nucleic acid binding	UDP-glycosyltransferase activity	peptidase activity	cysteine-type peptidase activity	metallopeptidase activity	anion transmembrane transporter activity	primary active transmembrane transporter activity	tubulin binding	lipase activity	oxidoreductase activity, acting on CH-OH group of donors	oxidoreductase activity, acting on paired donors, with incorporation or reduction of molecular oxygen	transferase activity, transferring one-carbon groups	transferase activity, transferring acyl groups	transferase activity, transferring glycosyl groups	transferase activity, transferring phosphorus-containing groups	nucleotidyltransferase activity
magnesium ion binding
peptide receptor activity
G-protein-coupled receptor binding
purine nucleoside binding
DNA binding	1.51844e-16	2.73186e-08	0.000241884	3.66665e-120
transcription coactivator activity	0.00151856			1.14509e-10
transcription corepressor activity				4.15506e-06
RNA binding					7.94846e-24
motor activity					2.93004e-22	2.62707e-07	1.06703e-05
GTPase activity					3.44547e-14
carboxylesterase activity
helicase activity					3.90223e-18	3.307e-05	0.00134901
nuclease activity					1.45373e-09
protein tyrosine kinase activity	0.000506443			1.13173e-09					2.4286e-09			3.50664e-06
receptor activity	5.30382e-13	2.20885e-05		3.28312e-89	8.93987e-06			6.13899e-14	1.72204e-21	3.90121e-08		4.39164e-16	4.96042e-06
olfactory receptor activity				1.29891e-11	2.51096e-19				1.1105e-08			8.46669e-05			7.48478e-09
receptor signaling protein activity	0.00198832			3.05093e-09					5.10365e-08			1.45619e-05
guanyl-nucleotide exchange factor activity					4.81206e-11										5.04311e-08
Ras GTPase activator activity					4.27894e-11	0.00966979								0.000723185	1.28745e-09		0.00398903
receptor binding	1.27709e-06	0.0353602		1.80462e-39	0.00151463			3.54335e-05	2.29061e-12	0.0003647		4.38468e-09	0.0308396			0.00270497		0.00220961	9.56763e-05
cytokine activity				1.55283e-05	0.00156689				2.3748e-05			0.00423018
cytokine receptor binding	0.00177187			2.97642e-10					1.85927e-08			7.61073e-06							0.00267481
hormone activity
potassium channel activity				0.000807207	0.00130996				2.79841e-05			0.00680139
iron ion binding	0.0195266	0.000494365	0.000421679	8.66153e-05	5.07833e-42	1.19132e-13	5.01715e-11	4.76343e-07		5.42171e-05	7.33616e-05		2.2904e-05	9.458e-16	1.93611e-41	2.95858e-19	5.57939e-15	1.51113e-05		6.78931e-25	3.35791e-11	2.28944e-15	0.000757741	1.49834e-10
calcium ion binding				3.78003e-14	6.36191e-08				2.99238e-06			0.000922672													1.0438e-14
calmodulin binding					1.32787e-19	3.62616e-06	9.14776e-05							5.45733e-08	8.46474e-19	2.71563e-07	5.39955e-07			1.3963e-10	0.000249691	2.265e-07		0.000173071		3.52915e-05
sugar binding	3.89518e-14	6.32576e-09	3.19682e-05	9.9995e-31				1.63826e-10	6.82693e-18	8.63564e-12	0.00366803	3.12841e-15	4.34317e-09	0.0261605	0.00178324	1.45047e-12		2.4456e-10	6.41376e-11	0.00776455	0.000176596	0.0121411	0.0082719	4.86241e-05	8.37952e-28	7.40585e-05	4.51044e-16
phospholipid binding					1.26118e-11										5.24954e-07					0.00416421					0.000331361			2.25549e-10
protein C-terminus binding					1.37628e-07										0.000116442										0.00118986			8.05821e-08
growth factor activity	0.0294105			6.06538e-07					4.71083e-06			0.000614984													3.23873e-11		0.000100951
cytoskeletal protein binding					4.50275e-43	1.573e-06	0.00182904							3.96947e-05	4.46227e-31	0.000814566	4.29071e-05			5.52473e-17	0.0205506	2.13403e-05				3.41277e-06		1.09388e-20			0.000483685
transcription factor binding	3.42282e-05			8.04914e-24				0.00535576	2.35944e-10	0.00769174		2.22338e-07						0.0361906	0.000780883						5.81786e-21		6.67246e-09	0.0367288	0.0286593			4.54121e-12
translation factor activity, nucleic acid binding					2.93351e-16	4.61455e-06	7.83432e-05							1.69214e-07	2.16594e-15	1.83013e-06	7.50086e-07			4.0058e-09	0.000275968	7.92282e-07		0.000278559		0.000132623		5.39103e-15			7.73914e-05		4.87577e-08
UDP-glycosyltransferase activity		0.0380772	0.0341617		8.84539e-24	9.34901e-09	2.23183e-07	0.00895328		0.020796	0.00485994		0.0075154	7.58652e-12	2.1047e-24	3.32068e-12	1.44308e-10	0.00274309		3.4427e-14	2.55702e-07	1.09559e-10	0.0458341	9.79211e-08		4.91411e-08		1.37361e-19			2.26229e-07		3.24626e-12
peptidase activity	1.57474e-14	2.58545e-07	0.00405984	3.47296e-56				7.96923e-13	1.18543e-20	1.09031e-10		2.65697e-16	7.28104e-08			2.94548e-12		1.09626e-09	1.79779e-10					0.0170748	1.47382e-36	0.00319064	4.85569e-18		3.33539e-09	3.56525e-06		9.08711e-28		1.41777e-15	1.0918e-22
cysteine-type peptidase activity	4.33267e-05			4.99072e-12					1.1327e-10			1.5527e-07						0.00429142	4.89314e-05						8.97363e-18		2.82042e-09					1.39817e-06		1.26845e-08	2.39517e-13
metallopeptidase activity	1.93127e-06	0.00951548		5.28177e-15				0.0189952	8.1234e-11	0.00106953		3.66857e-08	0.0186613			0.032713		0.00236198	4.6057e-05						8.43377e-19		2.18847e-09		0.00395947			2.6018e-09		4.81037e-09	7.91052e-13
anion transmembrane transporter activity					4.70578e-09										5.73436e-06					0.0264193					0.000205491			5.79731e-09							0.0370257	1.25369e-07		0.0150484
primary active transmembrane transporter activity					5.6348e-10									0.010696	6.26987e-08					0.00134468		0.0366306			0.00710595			8.6378e-10					0.0186272			3.65513e-09	0.000935492	0.00146244
tubulin binding					5.503e-07										7.60884e-05					0.037645								2.28843e-07								4.38576e-06		0.0263629
lipase activity				3.49402e-05					3.69178e-06			0.000918663							0.0347088						4.22334e-11		3.73624e-05					0.00931853		2.97894e-05	2.91504e-08
oxidoreductase activity, acting on CH-OH group of donors					1.72587e-13	0.00332511	0.0373198							7.18269e-05	6.52877e-12	0.024814	0.000954458			6.0683e-06		0.000413044						1.47915e-12			0.025134		0.000157455			9.55131e-13	4.34315e-06	5.3057e-06				0.0126315
oxidoreductase activity, acting on paired donors, with incorporation or reduction of molecular oxygen	0.00903623	0.00022581	0.000592301	0.00019654	3.14193e-29	2.23137e-11	9.7656e-10	1.06823e-05		0.0001032	6.67312e-05		2.63306e-05	4.59848e-14	4.62863e-30	2.53546e-16	3.5088e-13	6.59033e-06		2.36722e-18	8.2629e-10	3.62172e-13	0.00124364	7.23208e-10		2.10548e-11		1.09092e-22	0.000569384	0.0010896	7.72226e-10		2.96516e-16			2.13051e-27	1.08872e-15	6.49714e-16	0.000138648	0.00122532		2.21032e-10	0.0218029
transferase activity, transferring one-carbon groups					1.5515e-13	0.0469444									1.44602e-09					0.000126576					0.00167053			7.17838e-12					0.00230166			3.86639e-11	0.00320047	0.000303255						0.00102906
transferase activity, transferring acyl groups					6.84671e-12										3.05508e-07					0.00607688					2.71931e-06			3.9358e-10							0.0022134	3.47863e-09		0.0104053						4.42456e-06
transferase activity, transferring glycosyl groups					1.74911e-38	5.26959e-10	2.29339e-07	0.00870844						1.41369e-11	5.85571e-36	9.64752e-13	1.00154e-10			5.0509e-20	3.74567e-07	4.44331e-11		1.49684e-06		5.1016e-10		2.11816e-24			1.13111e-07		5.33418e-16			8.03508e-32	1.73147e-13	2.00726e-14				1.9199e-07				0.0244926
transferase activity, transferring phosphorus-containing groups					8.58102e-65	1.44476e-06	0.00340053							1.70113e-05	2.37365e-45	0.000729074	2.85387e-05			3.35707e-21	0.0447856	1.24339e-05			3.85186e-07	3.42192e-06		1.33359e-23			0.000699474		1.37751e-13		0.012886	6.70987e-36	3.29176e-07	4.75844e-10				0.0140455		3.20825e-06
nucleotidyltransferase activity					2.90108e-12	0.00651503								0.00338584	1.05061e-09		0.00814614			4.5585e-05		0.00823255						1.32297e-11					0.000470923			6.30237e-11	0.000335324	5.18174e-05
hydrolase activity, acting on ester bonds				3.90507e-13	1.00573e-25				4.74531e-07			0.00100528			9.79264e-12					0.000362053					1.5707e-17		6.85067e-06	1.39395e-12				0.000217314		3.14941e-05	7.66541e-10	9.40786e-14		0.0312834						4.4498e-14			3.64586e-11	0.000422619
thiolester hydrolase activity	0.000236165			1.22389e-08					1.01836e-08			4.29898e-06						0.0224364	0.000466164						5.25126e-14		1.94258e-07					9.05381e-05		3.1255e-07	5.49037e-11					0.00376727			3.58488e-05	1.28117e-12	0.0265573		1.57854e-10	2.65936e-05	0.00182663
hydrolase activity, acting on glycosyl bonds	9.74839e-05			2.50195e-10					6.23041e-10			3.98354e-07						0.00625117	6.69025e-05						3.68055e-16		7.12284e-09					6.72164e-06		1.37607e-08	1.00999e-12					0.00165498			8.53918e-06	9.97321e-15	0.00326601		2.46289e-12	2.43531e-06	0.000346474
hydrolase activity, acting on carbon-nitrogen (but not peptide) bonds					3.01698e-05										0.0255037										3.19577e-05			3.07682e-06							0.0024506	0.000310343								3.52109e-05
hydrolase activity, acting on acid anhydrides					6.48822e-75	4.14471e-10	4.8157e-06							2.64422e-09	7.57851e-59	2.56469e-10	6.0983e-09			8.10552e-30	1.62453e-05	8.25892e-10		0.000565979	0.0222267	7.5413e-12		5.48746e-28			8.16106e-07		5.87561e-20			1.33054e-44	1.94383e-11	3.96958e-14				3.52652e-05		0.0165665
hydrolase activity, acting on acid anhydrides, catalyzing transmembrane movement of substances					1.11097e-09									0.00824805	9.75184e-08					0.00182106		0.033132			0.00265521			9.84414e-10					0.0268156		0.0228244	5.06909e-09	0.000777544	0.00171213						0.000347342
ligase activity, forming carbon-nitrogen bonds	0.000939276			1.23496e-13	0.000190781				1.26099e-09			2.52101e-06							0.00173113						2.00833e-18		3.58699e-08	4.54604e-05				2.00223e-06		1.72545e-07	2.15681e-12					0.0486337			0.000254974	1.61333e-15			1.6619e-13	4.35322e-07	0.00507638
ATPase activity					3.10698e-49	1.9223e-11	4.41473e-08	0.00109743						1.67635e-12	7.52941e-45	3.14006e-14	1.74239e-11			4.60408e-25	5.85386e-08	1.53129e-12		4.20664e-07		2.94122e-12		3.13937e-27			1.36514e-08		4.51906e-19			3.63627e-38	1.09287e-14	9.4146e-16				1.08255e-07				0.0159798		0.0407822
purine nucleotide binding					4.19312e-128	3.49401e-10	1.20372e-05							5.50323e-09	9.64421e-92	2.20297e-10	1.23136e-08			1.55921e-39	5.49314e-05	1.30206e-09		0.00283167	1.05103e-05	1.80422e-13		2.38065e-30			1.69974e-06		3.12175e-23			3.4286e-56	2.54272e-11	1.97229e-14				0.000100371		4.10445e-05
SH3 domain binding					0.00822033				0.0422781																9.96917e-06			0.000360612							0.00153429									1.14864e-05			0.0189169
serine hydrolase activity	6.20869e-20	1.19618e-13	1.00907e-07	3.65998e-39			0.00186372	4.5118e-14	5.73227e-23	1.08679e-16	7.45955e-06	9.02595e-20	1.46314e-13	1.1925e-05	5.25996e-08	1.16789e-20	0.000137667	5.44923e-16	2.39109e-15	1.90458e-05	9.20081e-08	1.19204e-05	8.78846e-05	1.79256e-09	8.50669e-33	5.02874e-08	2.43302e-20		8.45049e-15	3.43145e-11	0.0107766	2.37746e-26	0.000126631	9.15658e-19	4.07356e-24		0.000444216		3.0395e-13	4.20134e-15	9.41789e-11	0.00265105	2.20694e-18	1.33318e-26	1.39577e-16	5.43481e-15	3.53372e-30	3.5467e-31	8.27922e-16
guanyl nucleotide binding					1.58799e-32	0.000112736	0.0321843							0.000450517	5.20163e-23		0.000827506			7.51665e-12		0.000370593			7.95284e-06	0.00527431		8.79528e-19			0.00992518		2.9844e-08		0.0258321	8.05775e-23	1.12313e-05	1.14992e-07						1.77264e-05
growth factor binding	9.55793e-12	6.52249e-08	0.000570926	5.60268e-21				8.37663e-07	2.86104e-16	1.04539e-08	0.00736128	1.43127e-13	1.2583e-07			8.22207e-09		2.15433e-09	2.06612e-10		0.00488528			0.000773169	6.43909e-23	0.0112305	1.85503e-14		1.42634e-07	1.68072e-06		4.50171e-14		1.21824e-13	1.73466e-18				1.27609e-07	2.01419e-09	9.4648e-07		2.26926e-12	4.80734e-20	8.75889e-10	6.38369e-08	3.44331e-20	4.47392e-16	5.82981e-10
enzyme binding				2.01247e-09	7.19757e-20				3.03064e-05			0.010781			7.30717e-09					0.006781					4.77482e-14		0.00026985	1.45857e-10				0.00274503		0.000513606	1.49428e-07	1.1317e-10								1.87112e-11			1.49632e-08	0.0106408
kinase binding				0.000113525	0.000877123				0.000121281			0.0178806													2.99266e-10		0.000952781	0.000136961						0.000975242	1.76493e-06	0.03419								3.70237e-09			2.59407e-06
protein domain specific binding				0.000136995	4.81163e-14				0.000774734						1.40029e-06					0.0351927					7.96903e-11		0.00640406	1.75099e-09						0.00549011	6.5012e-06	1.34912e-08								2.89481e-09			5.59652e-06
cytokine binding	1.49066e-11	4.79825e-07	0.0087527	9.1527e-20				2.81385e-05	9.75876e-16	2.25848e-07		7.11702e-13	1.82006e-06			1.54383e-07		1.65443e-08	5.5378e-10					0.00807169	7.51663e-23		3.68534e-14		1.33465e-06	3.05067e-05		8.98466e-13		2.46606e-13	2.7926e-18				1.1603e-06	6.41337e-09	1.13822e-05		6.92533e-12	8.64046e-20	2.00645e-08	1.12169e-06	1.21796e-19	9.96141e-15	3.78065e-09
passive transmembrane transporter activity				0.00130043	7.61683e-23				0.000481612						1.17626e-13					5.87079e-06					5.05668e-12		0.00410531	5.85536e-14					0.00211469	0.00404641	9.89064e-07	3.04159e-15	0.016783	0.000699294						1.24916e-10			2.5244e-06
active transmembrane transporter activity				0.0161993	7.3589e-23	0.0324895			0.00087928					0.0461652	1.26206e-14					1.16031e-06					2.53959e-11		0.00455437	6.05351e-15					0.000492623	0.00556329	5.76663e-07	2.38698e-16	0.00272812	0.00013978						2.01888e-10			7.93596e-06
ligand-gated channel activity					3.28772e-07				0.0343676						0.000806755										1.5725e-06			8.43167e-08							0.000373861	4.57009e-06								1.53093e-06			0.010376
inorganic cation transmembrane transporter activity					1.67899e-18	0.00310118								0.00252645	1.60689e-13		0.0108767			4.03119e-07		0.00385695			0.000682234			2.95421e-14					4.707e-05			7.78384e-15	0.000166863	1.70639e-05						0.000423647
substrate-specific transmembrane transporter activity				2.22318e-05	1.10018e-46	0.00198544			0.000389087					0.012039	6.00566e-29		0.0280563			8.2396e-13		0.00920839			2.37647e-13		0.00321043	7.33384e-19					2.38846e-07	0.00429129	4.18378e-07	8.90141e-26	0.000324301	4.12606e-06						2.46276e-11			4.94043e-07
polysaccharide binding	7.41563e-13	4.5753e-08	0.000240293	4.52306e-26				2.02221e-08	6.2469e-17	3.19576e-10	0.0111186	5.38125e-14	3.57645e-08		0.0410936	1.48498e-10		2.05139e-09	3.18592e-10		0.00149257		0.0365326	0.000269751	2.96472e-25	0.00168321	7.31463e-15		7.19115e-09	8.29691e-07		1.60561e-17		7.49773e-14	2.16763e-18				7.18608e-08	2.51734e-09	1.10704e-06		5.8123e-12	3.9489e-21	1.35058e-10	8.65284e-09	4.90432e-22	6.96043e-20	2.04096e-10
peptidase inhibitor activity	8.62344e-07	0.00334389		7.87808e-15				0.00784516	4.07504e-11	0.00057426		1.55488e-08	0.00562974			0.00410353		0.00033974	9.71249e-06						3.67491e-18		9.44626e-10		0.00137644	0.024351		2.42451e-09		2.51141e-09	5.74945e-13				0.0039532	0.000145981	0.00702522		1.00459e-06	1.17088e-15	0.000103629	0.00279905	2.19031e-14	3.86787e-10	1.59465e-05
GTPase regulator activity					7.35765e-27	0.00908929			0.0381449					0.0171225	2.2498e-18		0.0498485			2.95793e-08		0.0212288			4.94753e-09			1.35004e-15					2.31659e-05		0.000149238	2.07481e-18	0.00055888	3.16465e-05						3.36715e-08			0.00115319
protein complex binding	1.28491e-06	0.0111298		5.11694e-18				0.00584262	4.57335e-11	0.000614931		2.43043e-08	0.0129478			0.00560157		0.000932957	3.83525e-05						1.36346e-19		1.16188e-09		0.00295597			7.56602e-11		6.97614e-09	6.71375e-13				0.0108061	0.000374039	0.0175773		2.69946e-06	6.89642e-16	0.000183024	0.00570555	2.61676e-15	1.02051e-11	4.06658e-05
ribonucleotide binding					5.25054e-125	3.73626e-10	1.1816e-05							6.00972e-09	7.44782e-90	2.06829e-10	1.24573e-08			5.28891e-39	5.25893e-05	1.47385e-09		0.00280419	1.85981e-05	2.01863e-13		3.31695e-30			1.63473e-06		4.2477e-23			1.39979e-55	2.83471e-11	2.01332e-14				9.58464e-05		6.80672e-05
phosphoric ester hydrolase activity				0.000296815	5.28746e-17				0.000187118						6.47445e-09					0.00118702					9.18961e-12		0.00143476	6.6021e-12						0.00222522	5.90006e-07	1.32959e-11		0.0090331						2.73978e-10			1.84268e-06
identical protein binding				1.35922e-05	9.85218e-25				0.00214402						1.65121e-12					8.45086e-05					4.08936e-11		0.0128947	5.12144e-12					0.0123929	0.0139041	3.01027e-05	3.2371e-13		0.016122						5.45298e-09			1.00732e-05
cation binding	2.11327e-09	0.00251221		4.07992e-90	3.07915e-08			6.27395e-12	2.63213e-16	2.25477e-06		3.67037e-12	0.000766631			4.88181e-06		4.47331e-05	1.36394e-06						5.53867e-34		3.13353e-14	0.00374745	3.74033e-05	0.00560135		6.15104e-28		7.8687e-12	1.65778e-18				0.000750602	5.26922e-05	0.00325822		5.75272e-08	4.42581e-24	6.22184e-07	5.41423e-05	1.56579e-28	3.8981e-41	4.42765e-07
ATPase activity, coupled to movement of substances					4.03063e-10									0.00364311	2.778e-08					0.000726174		0.01436			0.0121481			4.83126e-10					0.0119541			1.89801e-09	0.00032783	0.000805747						0.00156395
sequence-specific DNA binding	2.8253e-16	6.27146e-09	7.03168e-05	1.90877e-66				5.99003e-18	4.9902e-22	6.33224e-14	0.0134158	3.15259e-18	5.5815e-10		0.000301143	8.47678e-17		2.01938e-11	1.00415e-11	0.00272353	0.000411581		0.0341224	0.000302688	1.49703e-38	6.6624e-07	1.65869e-19		1.35631e-11	3.02335e-08		1.21928e-33		9.44871e-17	8.57009e-24				1.34975e-09	2.46437e-10	1.19936e-07		6.14366e-14	1.38329e-28	1.13289e-13	7.70537e-12	8.31131e-35	1.31015e-43	1.18163e-12
structure-specific DNA binding	2.2613e-05	0.0176362		2.51539e-12				0.0328063	2.53453e-09	0.00302444		3.88553e-07	0.0314298			0.046092		0.00322004	0.00012031						1.2035e-15		3.35912e-08		0.0108855			7.34285e-08		8.51637e-08	2.76246e-11				0.0197702	0.00210066	0.0292597		2.60362e-05	1.43044e-13	0.00071989	0.0164924	2.77203e-12	2.21967e-08	0.000153184
DNA regulatory region binding	4.93358e-10	2.18698e-06	0.00192395	5.35584e-19				3.35298e-06	1.15098e-13	4.46682e-08	0.0427548	1.10486e-11	2.98857e-06			1.07666e-07		1.54988e-07	1.64405e-08		0.012916			0.00325371	1.93379e-20	0.0221987	2.50063e-12		8.51237e-07	1.75913e-05		3.12953e-13		9.46397e-12	1.72577e-15				2.27753e-06	1.86325e-07	1.10494e-05		7.80072e-10	1.62364e-17	2.61288e-08	7.44803e-07	1.44416e-17	1.20548e-14	1.39881e-08
metal ion transmembrane transporter activity					3.9847e-06				0.00234011						0.00765217										1.94543e-08		0.011332	4.93411e-07						0.00625989	4.85632e-06	5.39644e-05								1.96441e-08			0.000222292
protein heterodimerization activity				1.54015e-06					1.94686e-05			0.0032993													1.34901e-11		0.000182949	0.00441881				0.00175595		0.000178061	3.90097e-07									5.41243e-10			2.06215e-07	0.0056166
protein dimerization activity				9.70011e-08	8.26184e-17				0.00022589			0.0428671			9.01581e-07					0.0440934					3.08488e-12		0.00170126	1.77559e-09				0.0064928		0.00225716	2.99171e-06	7.45187e-09								8.0932e-10			4.24339e-07	0.0382986
coenzyme binding					2.12805e-21	6.73731e-05	0.00304068							1.7636e-06	1.04839e-18	0.000584119	2.5795e-05			1.1827e-09	0.0225083	5.92086e-06		0.0254681	0.00553686	0.00438087		6.27156e-17			0.00230836		2.99182e-07			6.72361e-19	3.68152e-08	5.13756e-08				0.00170688		0.000791709
GTPase binding					1.17078e-05										0.00436538										0.000750737			1.35712e-06							0.0318766	9.21193e-05								0.000430642
unfolded protein binding					4.39566e-17	1.08021e-06	1.95686e-05	0.0153401			0.0328943		0.0488311	3.051e-07	1.13268e-15	3.31083e-07	3.85224e-07			4.36585e-10	9.01425e-05	9.80561e-07		0.00026503		6.78929e-06		6.70891e-15			1.74649e-05		3.79103e-09			1.14504e-15	3.48881e-08	2.15446e-09				1.25226e-05				0.0214689
endopeptidase regulator activity	3.0595e-05	0.0439266		6.44359e-12					2.09278e-09	0.010614		5.49632e-07						0.00698772	0.000177496						7.37658e-16		3.70152e-08		0.0190372			1.99017e-07		6.73736e-08	3.40613e-11					0.00259549			2.93502e-05	8.30335e-14	0.00205599	0.0442408	4.05428e-12	7.97888e-08	0.000284986
[truncated: 41 more columns]

## Sheet: NumOfNonpolarAA
Class	magnesium ion binding	peptide receptor activity	G-protein-coupled receptor binding	purine nucleoside binding	DNA binding	transcription coactivator activity	transcription corepressor activity	RNA binding	motor activity	GTPase activity	carboxylesterase activity	helicase activity	nuclease activity	protein tyrosine kinase activity	receptor activity	olfactory receptor activity	receptor signaling protein activity	guanyl-nucleotide exchange factor activity	Ras GTPase activator activity	receptor binding	cytokine activity	cytokine receptor binding	hormone activity	potassium channel activity	iron ion binding	calcium ion binding	calmodulin binding	sugar binding	phospholipid binding	protein C-terminus binding	growth factor activity	cytoskeletal protein binding	transcription factor binding	translation factor activity, nucleic acid binding	UDP-glycosyltransferase activity	peptidase activity	cysteine-type peptidase activity	metallopeptidase activity	anion transmembrane transporter activity	primary active transmembrane transporter activity	tubulin binding	lipase activity	oxidoreductase activity, acting on CH-OH group of donors	oxidoreductase activity, acting on paired donors, with incorporation or reduction of molecular oxygen	transferase activity, transferring one-carbon groups	transferase activity, transferring acyl groups	transferase activity, transferring glycosyl groups	transferase activity, transferring phosphorus-containing groups	nucleotidyltransferase activity
magnesium ion binding
peptide receptor activity	6.93993e-35
G-protein-coupled receptor binding		1.32944e-22
purine nucleoside binding		1.47331e-55
DNA binding	1.17733e-16	7.19594e-61	1.50238e-18	6.83536e-103
transcription coactivator activity		1.14807e-39	0.000274189	0.000147487	0.0014092
transcription corepressor activity	0.000191543	4.56182e-34	8.33599e-06	1.00983e-07
RNA binding	1.9317e-05	9.66362e-54	2.86428e-09	1.42693e-23	1.34877e-05
motor activity	2.967e-07	1.47409e-35	9.46026e-08	7.51302e-11
GTPase activity		8.22214e-42	0.0010271	0.000467888	1.26864e-08
carboxylesterase activity	0.0285116	3.21052e-22		0.000270882	1.59155e-19	4.53042e-08	2.33862e-09	7.50791e-13	1.1488e-11	3.72712e-10
helicase activity	0.0113593	5.13507e-36	0.000125838	5.24465e-05							9.27918e-10
nuclease activity		1.13685e-35			1.77867e-11			0.0471193	0.00254288		0.00141955
protein tyrosine kinase activity		8.86861e-34			3.43813e-09				0.00485931		0.000152893
receptor activity	2.10893e-19	2.77632e-06	1.35111e-07	1.8412e-118	1.2009e-300	1.08148e-41	9.9457e-35	5.54787e-126	8.21841e-38	7.35634e-42	0.00589235	2.93396e-32	5.51189e-24	1.23455e-20
olfactory receptor activity	8.64058e-75	7.43747e-11	2.00819e-57	1.23457e-214	7.24757e-229	2.84173e-90	1.18682e-68	2.22371e-171	1.07726e-67	2.16554e-91	1.19909e-48	1.24269e-68	1.42309e-76	2.00003e-66	1.73158e-81
receptor signaling protein activity		8.93508e-35			8.11163e-09						4.12403e-05				1.99442e-25	1.50158e-72
guanyl-nucleotide exchange factor activity		1.42559e-35	0.00410687	0.00289824	8.01393e-05						3.05296e-09				2.20854e-30	1.68232e-69
Ras GTPase activator activity		1.53384e-28			9.03479e-08				0.000840073		0.00557902				2.72662e-14	9.83086e-52
receptor binding		1.39881e-46			1.71097e-42			6.77591e-07	0.00235753		0.000351834				6.01634e-93	2.62403e-171
cytokine activity		3.54023e-25		0.000133028	1.56206e-33	2.11959e-09	7.7054e-11	1.29286e-18	2.93378e-13	4.10039e-10		4.50185e-10	0.00515161	0.00292696	4.83989e-08	1.01592e-72	0.000145117	1.09112e-08		4.80502e-06
cytokine receptor binding		7.56486e-29			3.61124e-27	1.51241e-06	1.45816e-08	9.58651e-14	5.18151e-11	5.84064e-07		1.63891e-07			1.6901e-11	3.06721e-75	0.0241068	4.81108e-06		0.00675273
hormone activity		4.8766e-21			3.95206e-13	0.00842074	0.000212614	2.82279e-06	4.19265e-06	0.0126725		0.00240125			2.14066e-06	5.11278e-48		0.0287922
potassium channel activity		4.74218e-24		0.00450449	2.73898e-24	2.31286e-08	4.73446e-10	1.25817e-14	4.9819e-13	9.76924e-10		6.18023e-10	0.00845804	0.00562467	2.35286e-05	3.81022e-57	0.000207281	5.88386e-09		0.000278735
iron ion binding	2.31764e-06	7.45781e-27		1.14342e-14	2.75673e-49	2.61e-17	1.37071e-17	3.7801e-31	3.76184e-22	9.70303e-20		1.42379e-17	9.61028e-09	8.14469e-09	4.61508e-05	1.02301e-81	6.04136e-11	1.93388e-16	3.37046e-06	1.53622e-14
calcium ion binding	0.000681478	5.53382e-54	2.11635e-07	3.39498e-16	3.16856e-14						1.20429e-12				7.77601e-109	6.12931e-164				0.0480131	1.59625e-16	8.87084e-12	4.78471e-05	1.01063e-13	6.50507e-30
calmodulin binding		4.5175e-34	0.00367534	0.0397067	0.0060341						5.08302e-07				7.61569e-28	8.16506e-67					3.09973e-07	6.00178e-05		5.67671e-07	7.60205e-14
sugar binding		4.90988e-37			2.49761e-09						8.81774e-06				4.67542e-32	4.50165e-82					6.00326e-06	0.0020897		1.12689e-05	4.73514e-13
phospholipid binding		1.25051e-36	0.0244509		2.53546e-07						5.8099e-07				6.11941e-33	4.49522e-80					6.61693e-07	0.000208697		1.17964e-06	1.64749e-14
protein C-terminus binding		1.69595e-32			6.48352e-05						0.000111002				8.58918e-25	4.50801e-67					6.51242e-05	0.007506		0.000131526	1.52708e-10
growth factor activity		6.31794e-30			2.93273e-07										3.56512e-21	2.06043e-67					0.0341244				3.02769e-06
cytoskeletal protein binding	5.55243e-07	5.134e-51	2.46267e-09	5.4506e-22	5.58021e-06						8.93566e-14		0.00868538	0.0330265	9.42752e-101	1.92245e-146			0.0358533	1.59909e-05	1.08952e-18	2.10031e-14	1.48278e-06	9.41055e-16	6.68768e-32
transcription factor binding	0.000911076	2.53856e-50	1.32911e-06	1.4105e-13	1.76247e-09						1.20668e-10				1.15982e-91	5.51843e-149				0.0489286	1.21635e-14	1.86163e-10	0.000230139	6.40008e-12	6.38e-26
translation factor activity, nucleic acid binding	0.0057664	5.32837e-29	7.23275e-05	0.000127453							3.02292e-08				9.40966e-24	1.31226e-50					1.82167e-08	1.23061e-06	0.0011269	1.14578e-08	2.13604e-14
UDP-glycosyltransferase activity	1.97787e-08	5.49879e-23		2.13205e-13	2.89591e-36	2.08875e-17	1.62082e-18	1.21749e-25	8.49653e-22	4.28694e-22		8.26616e-20	3.12124e-10	2.99617e-11		3.28713e-58	1.14283e-12	4.50549e-20	4.74791e-09	4.49377e-13						1.79012e-26	4.54165e-15	1.10636e-14	6.70618e-16	7.32712e-12	8.83034e-07	4.82671e-28	1.98849e-23	3.96628e-15
peptidase activity		1.13942e-47			1.1518e-36		0.00297131	1.17897e-07	4.54626e-05		8.80995e-05				2.66982e-68	9.29968e-152					1.50654e-05	0.0220337		0.00023632	2.53298e-14	0.00174291						1.71329e-07	0.00142911		9.34029e-14
cysteine-type peptidase activity	1.60377e-07	5.5011e-37	8.30535e-08	6.59887e-12							2.08182e-13		0.0025514	0.00186792	1.69578e-39	2.36457e-69			0.00114399	0.00855848	1.21408e-14	3.45006e-12	3.19534e-06	6.599e-15	8.52944e-24										1.85046e-25	4.36869e-05
metallopeptidase activity		1.46512e-36			5.17452e-10						0.000147131				3.1272e-27	1.96193e-79					0.000421774			0.000998912	1.77043e-10										3.59302e-11		0.0401818
anion transmembrane transporter activity	9.82214e-22	5.26022e-09	8.30204e-07	6.28081e-38	8.78286e-57	7.79676e-31	2.02927e-27	5.81493e-46	4.31839e-31	2.39302e-36	8.58146e-05	1.68897e-30	1.65851e-23	4.68069e-24		4.0261e-45	2.62604e-25	7.21768e-31	2.77824e-19	6.98882e-31	2.03402e-07	2.18101e-11	7.27915e-07	1.02195e-07	9.34702e-05	2.87544e-47	6.79653e-26	1.64484e-27	9.2243e-29	1.44683e-22	2.34583e-17	1.77891e-45	5.74938e-41	4.85291e-24	0.00238882	6.13069e-33	1.12262e-34	1.94235e-25
primary active transmembrane transporter activity	7.68025e-12	1.06869e-16		6.24015e-19	1.30907e-36	4.67325e-20	3.45832e-19	7.63881e-29	2.46062e-23	3.26142e-25		1.58483e-21	1.50505e-13	6.63061e-15		1.25157e-45	5.41314e-16	3.57069e-22	8.1212e-12	8.49927e-16		0.00291719				2.68797e-30	2.09413e-17	2.71691e-17	6.45104e-19	4.3499e-14	5.18786e-09	2.06802e-30	1.55488e-25	1.09534e-17		9.97541e-18	1.71732e-26	3.53907e-15
tubulin binding	0.00231404	2.13824e-29	4.41341e-05	6.94384e-05							3.21523e-08				8.80548e-25	9.52678e-52					2.11629e-08	9.6592e-07	0.000762793	2.81265e-08	7.16256e-15										7.67746e-15				8.28107e-24	2.59965e-17
lipase activity		2.63208e-23			3.77498e-14	0.000917363	1.57139e-05	3.95383e-07	2.21684e-07	0.000334801		9.00345e-05			2.17834e-06	1.82383e-50		0.000908118								3.16235e-06	0.00781686		0.0207128			6.01872e-08	1.60565e-05	0.000236008			4.40552e-08		5.01777e-08		0.00014012
oxidoreductase activity, acting on CH-OH group of donors	4.11068e-12	1.76715e-24		6.57936e-19	6.74997e-38	7.37736e-21	1.80557e-20	1.86768e-30	2.53512e-25	2.00964e-28		2.87049e-24	4.42775e-14	7.12729e-16		2.41422e-56	3.51549e-17	2.26348e-25	9.28783e-13	3.16117e-15		0.0459583				7.63535e-33	8.23181e-19	1.94822e-18	1.10608e-20	1.25443e-14	1.91699e-08	7.52515e-33	1.02772e-26	1.17803e-19		5.88201e-18	2.08444e-30	9.0945e-16	0.00550208		2.02016e-18
oxidoreductase activity, acting on paired donors, with incorporation or reduction of molecular oxygen	5.15162e-06	1.02732e-25		3.85631e-11	7.1542e-34	1.38314e-14	5.53965e-15	3.50468e-23	6.52464e-19	2.43093e-17		8.8431e-16	9.32128e-08	1.82069e-08	0.0045217	8.73701e-65	6.76506e-10	4.95041e-15	2.67959e-06	2.59028e-10						5.66693e-23	3.22404e-12	1.95642e-11	9.11895e-13	3.44976e-09	4.62641e-05	1.94393e-24	9.0046e-20	6.29166e-13		4.23903e-11	9.26228e-21	2.24359e-09	0.000452426		3.37625e-13
transferase activity, transferring one-carbon groups		5.58665e-35			3.10647e-11			0.0187045	0.0243794		0.0331695				1.59418e-23	5.87007e-79									4.00419e-07							0.0175038			2.75123e-07		0.0119116		6.27108e-21	6.57153e-11			2.6778e-10	5.20114e-06
transferase activity, transferring acyl groups	0.000187318	1.52034e-23		2.60492e-11	9.2909e-43	7.57164e-14	2.83701e-14	5.25663e-26	1.87271e-17	5.41744e-15		1.19342e-13	1.28394e-06	8.87633e-07	3.57363e-05	9.66312e-77	4.31591e-08	1.61075e-12	0.000187966	2.00721e-11						5.31221e-24	1.19675e-10	8.85111e-10	5.0176e-11	4.63654e-08	6.63642e-05	1.33819e-25	5.78055e-21	2.16474e-11		6.10759e-11	1.76877e-18	5.56917e-08	0.00102608		7.9121e-12				1.51607e-05
transferase activity, transferring glycosyl groups	4.814e-10	1.92489e-25		3.68417e-23	1.89659e-67	1.53017e-23	1.90178e-23	8.69625e-43	2.28526e-27	4.58237e-28		6.63474e-24	7.35962e-13	5.11128e-13	0.00273627	1.56397e-83	1.15985e-15	1.15422e-23	8.24679e-10	1.37367e-22						4.69832e-42	1.4479e-18	6.14529e-19	3.04922e-20	7.69184e-15	2.66349e-09	8.29627e-44	1.07124e-36	5.98398e-18		6.96852e-22	3.00241e-31	1.58295e-14	0.000450499		6.69552e-18				5.39768e-10
transferase activity, transferring phosphorus-containing groups		1.68589e-52			1.02026e-61	0.0223146	1.1181e-05	4.16126e-14	1.55184e-08		3.5753e-05	0.00641334			7.97948e-90	1.18412e-181					1.10765e-05	0.0418937		0.000326974	1.22006e-15	8.93706e-09						3.09748e-14	5.61558e-08	0.00441457	4.38037e-15		6.82627e-09		2.64254e-37	8.14013e-20	0.00164564		2.4626e-20	3.40365e-12		5.79182e-12	1.91814e-24
nucleotidyltransferase activity		4.02773e-31			8.84139e-08						0.0143002				9.28945e-18	5.61321e-62									1.3363e-06										1.09906e-07		0.0304927		2.1433e-19	5.87004e-11			3.65275e-11	4.70909e-06		5.94956e-05	1.95896e-09
hydrolase activity, acting on ester bonds		7.98649e-49			2.17957e-54	0.00661352	8.11034e-06	2.50502e-14	1.38534e-08		0.00263853	0.00320236			1.96141e-70	5.10199e-166					0.00125359			0.0146767	8.57936e-12	3.45293e-09						5.19144e-14	2.7753e-08	0.00200136	1.34991e-11		9.70311e-09		2.08263e-31	1.26314e-15	0.000756816		2.6639e-15	5.71469e-09		6.0096e-09	6.0287e-19
thiolester hydrolase activity	0.0025887	2.29752e-30	0.000207561	6.88083e-05							3.01382e-08				4.9631e-25	1.22684e-52					9.96607e-09	9.26531e-07	0.00355309	6.65333e-09	4.1578e-15										5.40803e-17				1.49842e-24	9.4301e-18		0.00015541	2.6246e-19	2.93292e-13		1.41821e-11	5.95982e-20	0.00235311
hydrolase activity, acting on glycosyl bonds		3.98834e-26			7.81798e-22	1.28718e-07	4.28534e-10	2.12122e-12	1.7939e-12	1.10064e-09		1.40393e-09		0.0218012	3.43859e-06	4.893e-56	0.00102964	2.57656e-09		0.00347482						4.19299e-12	3.45324e-06	3.48042e-05	4.10027e-06	0.000521079		1.23335e-14	7.11968e-11	8.87422e-08		0.00387733	5.08974e-15	0.0140509	7.71163e-11	0.00157105	1.53376e-07		0.00628681					0.00717937
hydrolase activity, acting on carbon-nitrogen (but not peptide) bonds		2.4857e-25			2.47837e-22	7.35102e-08	2.53505e-10	1.21331e-12	6.46163e-13	4.59789e-10		1.07931e-09		0.0224624	7.63827e-06	2.20948e-54	0.000847232	9.24348e-10		0.00223621						2.68683e-12	2.26548e-06	1.25641e-05	2.30402e-06	0.000221955		4.81102e-15	3.06527e-11	9.17826e-08		0.00268344	1.33802e-15	0.0113404	8.44222e-11	0.00106338	1.116e-07		0.00261455					0.00479753
hydrolase activity, acting on acid anhydrides		1.77449e-51	0.0332096		1.31855e-40		0.013774	6.16546e-07	0.000113268		1.17852e-06				5.90555e-91	1.70038e-170					5.38442e-08	0.000340267		3.24298e-06	8.38277e-19	0.0118639						8.6738e-07	0.0153361		3.41161e-17		0.000180111		3.80539e-38	1.94819e-21			4.9611e-22	2.31561e-14		1.28761e-14	7.50487e-28
hydrolase activity, acting on acid anhydrides, catalyzing transmembrane movement of substances	9.72077e-10	7.11859e-18		2.96507e-15	4.06993e-31	5.22654e-17	1.97888e-16	1.96457e-24	3.80803e-20	1.20133e-21		1.34416e-18	3.20979e-11	1.09823e-12		1.8396e-44	1.72656e-13	3.86581e-19	5.91133e-10	1.72525e-12						1.38115e-25	8.63179e-15	2.07642e-14	4.48288e-16	1.01796e-11	3.74543e-07	9.89586e-26	2.43361e-21	1.8321e-15		2.5202e-14	4.83791e-23	1.0551e-12			5.27837e-15				7.5852e-09			3.87482e-16	4.41892e-09
ligase activity, forming carbon-nitrogen bonds		2.11833e-42	0.00664505		4.50541e-11						3.33898e-07				1.01959e-45	1.63966e-104					6.71401e-08	7.91362e-05		7.36399e-07	1.25189e-16										1.6018e-16				1.82178e-32	4.82217e-20		0.0176115	3.6556e-21	7.94197e-14		7.06261e-13	5.95989e-23
ATPase activity		1.04501e-39			1.22891e-35	8.8549e-05	4.70439e-07	4.66034e-14	1.46514e-09	8.39001e-05		2.1656e-05			8.42773e-30	1.17828e-112		0.000482256							6.85869e-05	4.8224e-11	0.00748001		0.017319			2.31674e-14	2.01401e-09	4.80459e-05	3.01655e-05		1.63305e-10		3.63356e-21	3.89665e-09	3.85411e-05		5.05917e-08	0.000565095		0.0016607	4.21424e-08
purine nucleotide binding		8.72312e-57			2.41894e-106	0.00165383	6.59381e-07	2.73738e-21	5.89926e-10	0.00966748	2.21974e-05	0.000551822			7.04537e-138	8.95939e-223		0.0315305			4.48041e-06	0.0354989		0.000268975	3.36967e-17	1.01434e-13						6.11646e-20	9.52001e-12	0.000688209	1.33514e-15		9.88244e-11		1.11651e-40	4.09463e-21	0.000319538		1.55193e-21	5.53133e-13		3.00576e-13	4.88896e-27
SH3 domain binding		1.75166e-26			5.80245e-06						0.02283				2.07149e-14	2.67216e-50									6.08601e-06										1.74934e-07				9.03471e-17	7.62535e-10			4.34004e-10	1.81563e-05		0.000290231	1.11328e-08
serine hydrolase activity		3.91106e-32			3.02182e-19	0.0068328	7.62471e-05	1.21688e-07	5.87151e-07	0.0297601		0.00258507			2.93124e-16	1.96572e-76									0.041308	1.29746e-05						4.40955e-08	3.42428e-05	0.00174677	0.00247354		5.15543e-07		2.31851e-14	2.94186e-05	0.000665252		0.00051314				0.000110639
guanyl nucleotide binding		3.61216e-48	0.00933658	0.0277678	2.19542e-22		0.0467675	0.00921378	0.000418758		8.02675e-09				7.4826e-61	3.45289e-130					3.03697e-09	1.37368e-05		2.96311e-08	4.44959e-20							0.000714118			9.64488e-21		0.000654555		9.82704e-40	3.54045e-25		0.00859745	1.03151e-27	9.627e-17		3.5681e-15	1.67678e-29
growth factor binding		1.60332e-30			0.00400303						8.56441e-06				7.27733e-21	9.25922e-56					3.88869e-05	0.00373905		2.8019e-05	3.5662e-11										9.44983e-13				3.52604e-23	9.52018e-16			6.52335e-17	1.95678e-10		2.08267e-08	7.66003e-15
enzyme binding		1.48384e-50	0.000314613	1.16026e-06	1.31272e-21						3.76282e-08				1.59554e-91	2.97436e-159					5.55762e-11	4.85322e-07	0.0201244	9.62974e-09	7.95918e-22										1.29874e-19				7.4946e-39	1.03771e-22		0.00279933	1.8317e-23	1.54175e-16		2.34361e-17	1.53455e-31	0.0139552
kinase binding		1.37107e-38			5.11179e-09						4.59505e-05				8.29164e-34	2.46892e-88					1.3191e-05	0.0044228		6.47353e-05	2.55277e-12										3.16161e-13				9.14178e-27	6.80219e-16			3.01133e-16	2.0908e-10		1.33188e-09	1.29585e-17
protein domain specific binding		3.00731e-43	0.00218941	0.000177698	1.31643e-12						7.44919e-07				2.33422e-61	7.28992e-123					6.54895e-09	8.39829e-06		2.28244e-07	9.13297e-18										4.56618e-17				6.67727e-32	4.92531e-19		0.00999566	2.02401e-19	1.03599e-13		7.53834e-14	8.81039e-26
cytokine binding		5.21707e-16			7.00422e-19	1.18926e-05	6.04541e-08	8.99705e-10	6.86431e-10	2.09759e-05		3.14858e-06			0.0013571	1.52228e-45		5.96035e-05		0.00760972						2.38606e-08	0.000202718	0.00394262	0.00104474	0.00705107		9.05102e-11	2.30123e-08	9.91179e-06		0.042851	3.1622e-10		0.000217616		4.06295e-06
passive transmembrane transporter activity	5.11942e-11	1.05581e-29		6.69326e-33	9.11271e-96	1.54776e-26	6.32164e-25	8.60064e-57	1.43828e-29	1.91318e-31		7.52088e-26	2.51134e-14	3.20055e-14	3.06616e-07	1.43062e-113	2.88052e-17	2.7738e-25	2.77637e-10	2.06715e-29						1.64235e-54	4.95225e-20	4.78871e-21	9.93234e-23	6.50137e-16	2.85767e-10	1.23776e-54	1.85049e-45	2.22955e-19		7.6281e-28	1.14598e-33	1.17484e-16	2.48659e-05		2.81227e-19				1.62509e-11			1.17041e-32	2.00324e-10
active transmembrane transporter activity	1.08616e-46		1.85725e-22	2.32045e-119	4.84284e-151	1.3257e-61	9.31445e-49	4.53621e-113	6.44115e-53	1.03334e-68	1.54716e-18	1.23351e-52	1.00253e-48	1.1842e-45	8.77158e-05	6.57117e-46	2.36775e-49	2.37894e-53	3.50856e-35	1.32833e-91	1.82432e-27	1.25344e-33	1.41246e-20	1.57897e-24	9.25312e-26	1.75354e-112	1.5892e-47	1.96853e-55	8.26077e-56	8.37831e-44	3.80331e-38	1.04514e-102	3.79043e-97	9.96969e-39	2.35262e-18	2.77616e-88	9.5936e-57	2.1482e-52	0.0106499	4.52999e-11	2.60191e-39	1.686e-22	2.66169e-19	1.82744e-21	1.56184e-46	3.29656e-22	3.66176e-25	2.21686e-106	4.94891e-39
ligand-gated channel activity	4.034e-07	4.36987e-23		4.09201e-12	4.51844e-35	2.62068e-16	2.85788e-17	7.64461e-25	1.0739e-20	7.76572e-21		1.96941e-18	2.85395e-09	5.32716e-10		1.89415e-58	1.09188e-11	8.14798e-19	3.75541e-08	9.94389e-12						1.68971e-25	4.73671e-14	1.01968e-13	4.65163e-15	6.43364e-11	4.24526e-06	4.75768e-27	4.91346e-22	1.04571e-14		1.07597e-12	1.74173e-24	1.9765e-10	0.000370325		3.19061e-14				1.11775e-06			1.071e-13	5.27621e-07
inorganic cation transmembrane transporter activity	1.4714e-27	0.0281689	3.29877e-12	3.36726e-57	4.77587e-83	3.11188e-39	1.12474e-33	5.13735e-64	5.09213e-37	2.85288e-43	4.18432e-09	3.09427e-35	9.82343e-30	1.09555e-28		6.65036e-36	7.47012e-31	2.51662e-35	2.52308e-22	9.60024e-48	1.06058e-13	5.53632e-18	1.88579e-11	1.53823e-12	2.18618e-11	1.70831e-63	3.04955e-31	2.28026e-34	2.52447e-35	3.29777e-28	1.30025e-23	1.18005e-60	2.13627e-56	2.19133e-27	4.60133e-08	2.45535e-47	1.33248e-39	5.94606e-32		0.00213172	1.13962e-27	1.42006e-12	1.4233e-07	1.35665e-09	4.29699e-28	4.08435e-10	1.98495e-10	5.53188e-54	2.39128e-24
substrate-specific transmembrane transporter activity	3.45118e-29	5.5649e-13	3.89086e-09	3.28767e-119	7.14983e-225	9.15508e-51	3.5378e-41	1.27332e-125	5.32593e-46	1.74838e-57	9.94291e-05	5.29778e-43	3.27383e-33	7.98287e-31		2.17108e-100	1.43176e-35	4.73458e-43	2.47915e-22	1.83748e-89	1.43969e-10	9.94076e-16	1.74642e-08	9.30972e-09	1.2505e-06	7.13345e-119	2.24941e-36	1.44624e-42	6.04346e-44	7.47425e-32	1.63798e-25	1.66423e-108	1.18794e-97	9.76949e-31	0.00657453	1.92052e-77	1.34517e-50	4.52037e-37			4.37164e-31	4.11144e-09	0.0470935	0.000180493	2.09575e-30	9.33793e-06	1.50704e-05	7.73173e-100	7.64365e-25
polysaccharide binding	0.0105494	3.56701e-36	9.73986e-05	2.00068e-05							6.76045e-08				1.50221e-35	9.77403e-76					2.13009e-09	4.70901e-07	0.00320096	1.37225e-08	2.34269e-16										1.20784e-16				1.13015e-27	3.21227e-18		0.000371355	6.5407e-19	1.05398e-13		4.66118e-13	1.07449e-21	0.00160357
peptidase inhibitor activity		1.72055e-33			3.55314e-12		0.0231724	0.00431233	0.000718137		0.0265685				4.74067e-20	3.97524e-71									1.39386e-06							0.000814589			4.90449e-08		0.000302245		1.18505e-20	2.95614e-11			3.93962e-11	5.26643e-06		7.79567e-05	4.28711e-10
GTPase regulator activity	0.00166676	2.48888e-50	5.32433e-06	4.39079e-11	1.63811e-12						7.4703e-12				2.10661e-78	3.00802e-135					1.54274e-14	2.36473e-10	0.000412892	9.76945e-13	6.00257e-27										2.07785e-26				1.63608e-43	1.56448e-28		9.03713e-06	3.18461e-31	1.32164e-21		5.94023e-21	1.72079e-38	4.00583e-06
protein complex binding		6.47258e-38	0.0355139		1.55357e-08						3.15435e-05				1.36199e-38	1.67123e-93					3.57366e-06	0.00106626		3.03263e-05	2.85997e-13										3.38009e-13				2.02505e-26	1.28394e-15			8.10347e-16	9.71452e-11		2.52744e-10	1.7572e-18
ribonucleotide binding		4.52102e-57			2.21827e-97	0.0120956	4.52182e-06	2.02749e-18	5.52607e-09		4.91306e-06	0.00380147			9.4702e-141	4.04498e-221					5.49597e-07	0.00656061		4.52477e-05	1.36601e-18	3.05988e-11						2.08791e-17	8.73184e-10	0.00278185	8.3337e-17		1.5213e-09		7.5563e-42	3.45058e-22	0.00123857		7.74093e-23	4.93533e-14		2.35682e-14	5.81366e-29
phosphoric ester hydrolase activity		2.00298e-40			1.17116e-33	0.00294345	2.8968e-06	3.69437e-11	2.21479e-09	0.0145283		0.000734538			4.34825e-35	1.97182e-115		0.0351083							1.67956e-07	6.38305e-08						4.00121e-12	2.36452e-07	0.000514868	1.2129e-08		1.73296e-09		1.05051e-24	2.20132e-12	0.000170944		3.38691e-12	2.93249e-06		2.62035e-05	1.75779e-12
identical protein binding		1.79832e-45			1.99385e-43		0.00139087	4.92137e-10	2.35887e-05		0.00873816				6.35478e-69	9.36039e-158					0.000944588			0.0136969	4.90278e-11	4.72029e-05						6.93104e-09	8.05335e-05		2.18583e-10		3.21729e-05		4.1042e-28	1.26098e-13	0.0413911		7.1034e-13	5.81734e-08		1.61045e-08	1.27219e-17
cation binding	1.81531e-06	4.98871e-60	1.17335e-10	5.07389e-53	2.30538e-16						9.6166e-14		0.00878782		3.98392e-285	6.30278e-241				2.51376e-14	4.0044e-22	4.06486e-16	4.45369e-07	6.50848e-16	4.66603e-37										3.6304e-28	7.32343e-13			1.34784e-51	5.9766e-31		6.62254e-08	6.76487e-32	9.84812e-26	0.00415308	2.32249e-31	9.29387e-53	2.69402e-26
ATPase activity, coupled to movement of substances	2.38225e-10	1.20745e-17		3.96966e-16	3.58172e-32	7.71203e-18	3.16314e-17	2.04802e-25	3.87657e-21	1.24169e-22		1.63044e-19	6.96751e-12	2.19504e-13		4.98217e-44	2.87058e-14	4.85079e-20	1.57577e-10	2.79668e-13		0.0236207				9.99384e-27	1.44624e-15	3.35397e-15	6.56419e-17	1.92573e-12	1.00826e-07	6.56454e-27	2.3643e-22	2.95234e-16		3.51067e-15	3.92916e-24	1.92538e-13			7.40031e-16				1.79947e-09			5.06815e-17	1.16715e-09
sequence-specific DNA binding		2.52756e-50	0.000274584	1.40489e-07	2.49861e-19						1.05773e-07				7.89033e-94	7.30874e-161					5.29048e-11	4.42891e-07	0.0202735	1.23279e-08	2.28153e-21										3.43146e-19				3.83077e-37	2.4733e-21		0.00238037	1.74407e-21	9.13309e-16		3.65264e-17	3.33889e-31	0.00201945
structure-specific DNA binding	0.000206449	2.46312e-35	4.50559e-06	8.8385e-08							1.10052e-09				7.60767e-36	1.30349e-70					3.30483e-11	7.95451e-09	0.000122964	2.64936e-10	1.83431e-18										9.64259e-19	0.0025078			5.98484e-29	3.19717e-20		1.18386e-05	1.32616e-21	7.82951e-16		6.07171e-15	8.13264e-24	1.22686e-05
DNA regulatory region binding		1.40031e-32	0.0028455	0.00839837							7.27167e-07				1.86308e-26	5.08883e-62					2.07687e-07	3.72417e-05	0.0314186	4.23599e-07	2.48115e-13										4.60171e-15				8.62637e-25	1.18327e-16		0.00418354	8.57162e-18	9.2704e-12		1.33793e-10	3.08654e-18
metal ion transmembrane transporter activity	1.83245e-25		4.298e-13	8.8172e-43	5.47905e-56	5.26411e-33	3.76474e-29	7.14235e-47	4.34222e-32	8.03437e-36	2.74743e-11	8.81723e-31	4.38086e-27	3.39188e-26		2.09193e-22	1.99825e-27	2.45384e-30	1.65056e-21	2.72303e-36	3.15486e-14	5.91955e-18	2.38733e-12	6.76695e-14	5.40566e-13	3.34825e-47	5.96663e-28	1.05573e-29	2.98085e-30	1.45464e-25	5.81402e-22	2.15837e-45	7.40131e-43	4.74407e-25	1.76428e-10	3.62192e-37	1.25432e-33	1.95439e-28		8.89696e-06	3.10441e-25	7.81268e-14	1.42371e-10	5.4267e-12	6.28113e-26	1.93488e-11	6.26094e-12	4.45759e-41	4.11109e-23
protein heterodimerization activity		6.36526e-33			7.3285e-15			0.0013582	0.00954523						1.42381e-24	1.72061e-84									3.74899e-05							0.00325514			1.19929e-05		0.00947322		1.153e-17	3.36405e-08			1.85097e-07	0.00082862		0.000710032	1.52184e-08
protein dimerization activity		5.25008e-44			1.84369e-39		0.0008874	6.31507e-10	1.77224e-05		0.0267422				8.06848e-59	6.04457e-147					0.00523724			0.0482484	1.20911e-09	2.79343e-05						6.61587e-09	4.72508e-05		2.97766e-09		1.88458e-05		1.64438e-26	1.45307e-12	0.0312187		7.913e-12	5.34065e-07		1.79409e-07	1.46223e-15
coenzyme binding	1.01682e-05	2.21112e-30		9.35637e-12	2.48986e-43	9.80489e-17	8.5149e-18	2.20069e-28	4.32657e-22	1.19535e-21		4.92381e-19	2.73115e-08	3.22932e-09	1.02248e-05	1.96929e-78	3.95972e-11	3.78503e-19	7.1909e-07	5.34881e-12						8.57014e-29	7.81091e-14	3.59029e-13	5.47427e-15	2.2893e-10	3.80706e-05	1.03062e-30	2.94178e-24	5.35567e-15		1.28999e-12	2.44634e-26	1.27406e-09	6.74023e-09		2.02762e-14				1.63387e-05			1.2324e-13	7.66918e-06
GTPase binding		1.22974e-29	0.00305291	0.0181609							1.48914e-06				6.58009e-23	7.022e-54					1.13603e-06	8.56028e-05	0.0356701	8.55151e-07	1.1411e-12										1.06519e-13				6.40422e-23	6.41155e-16		0.00532201	4.37497e-17	2.28007e-11		7.97943e-10	1.76428e-16
unfolded protein binding	0.00579039	1.29637e-30	5.37316e-05	0.000119738							8.51223e-08				4.82319e-26	2.08837e-55					2.0903e-08	1.47788e-06	0.00120982	4.33052e-08	1.33262e-14										6.31393e-15				4.78851e-24	9.63183e-17		0.000239037	1.82919e-17	5.28693e-13		1.10704e-11	3.6298e-18	0.00286189
endopeptidase regulator activity		5.52694e-33			2.29248e-11		0.0438443	0.0123794	0.00165029		0.0230625				9.16784e-20	2.27317e-69									1.37988e-06							0.00257196			3.75734e-08		0.000845385		2.12971e-20	3.41718e-11			4.03871e-11	5.28702e-06		7.72096e-05	3.5529e-10
[truncated: 41 more columns]

[truncated: 4 more sheets: NumOfSmallAAs, NumOfAromaticAAs, NumOfSulfurAAs, NumOfHydroxylAAs]
